# Supplementary material for: Identification and validation of microbial biomarkers from cross-cohort datasets using xMarkerFinder
Source: Springer Nature journal article supplement (doi:10.1038/s41596-024-00999-9), 2024-05-14
Supplement: MOESM1 [file 41596_2024_999_MOESM1_ESM14.pdf]

# Identification and validation of microbial biomarkers from cross-cohort datasets using xMarkerFinder

In the format provided by the authors and unedited

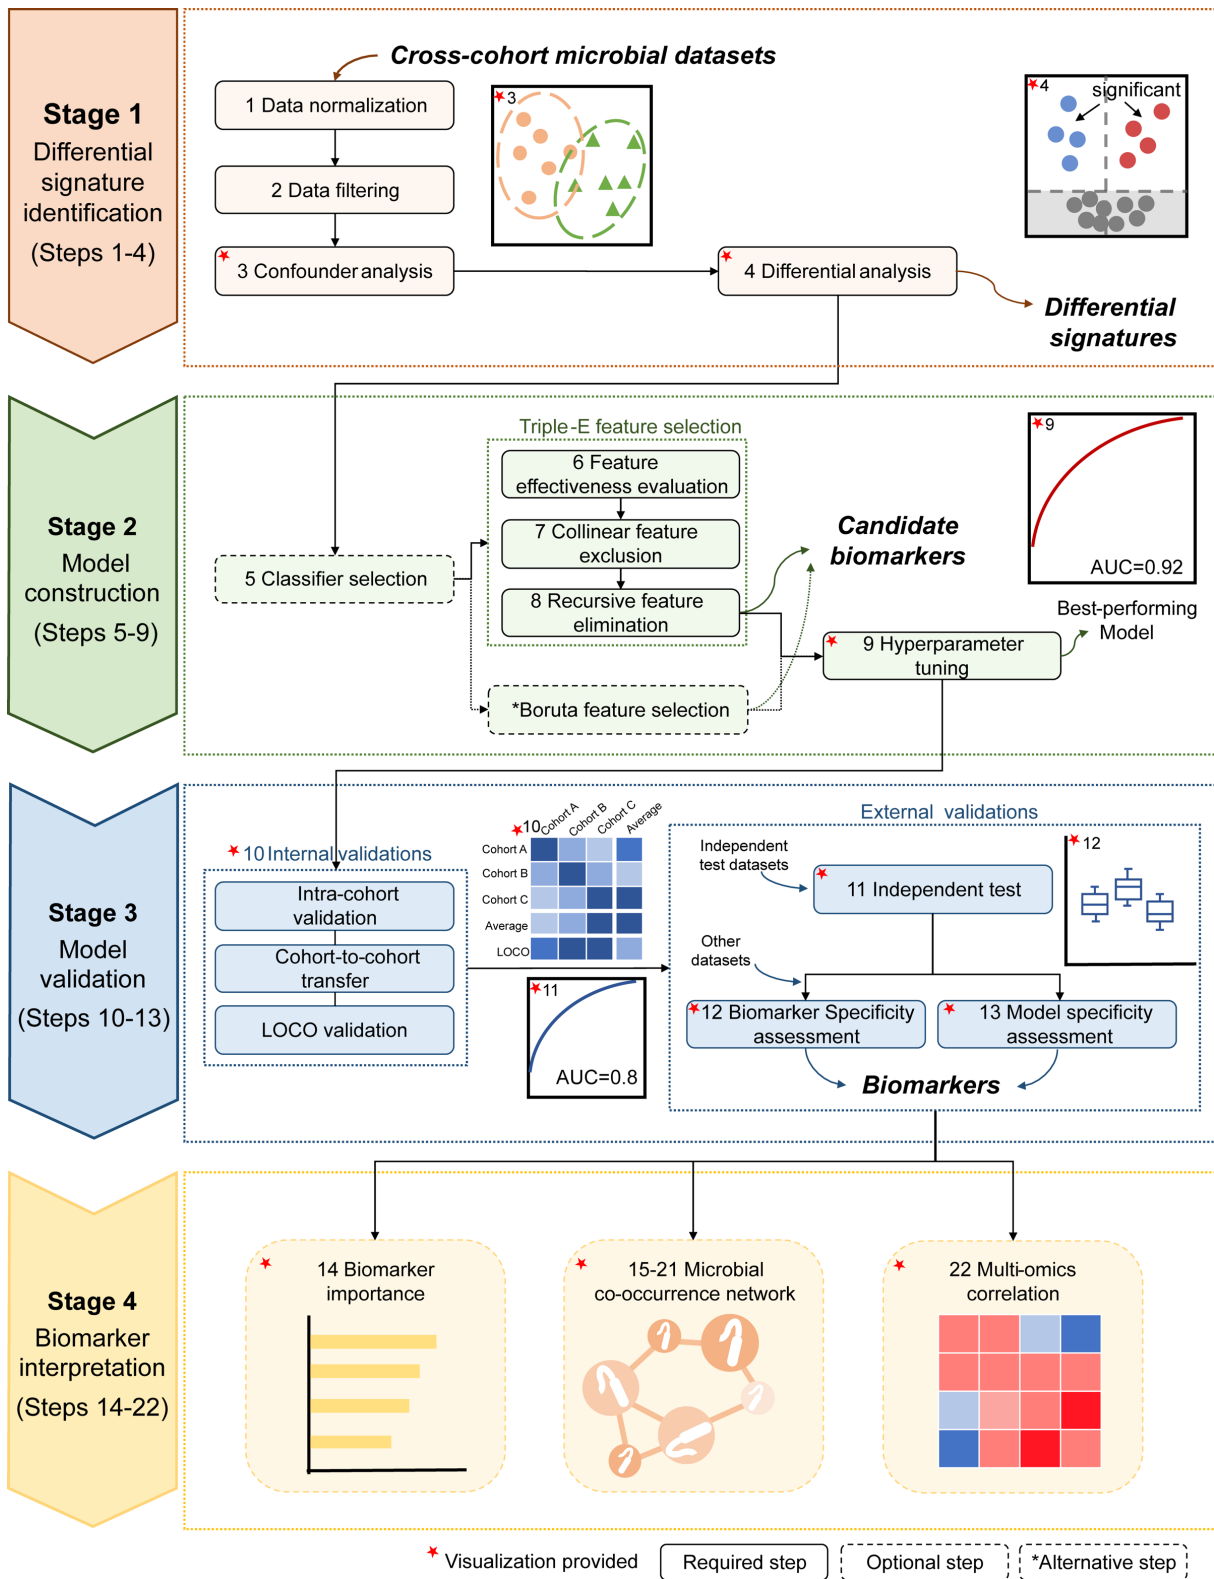

**Supplementary Figure 1. Overview of the xMarkerFinder workflow.** Four main stages of xMarkerFinder: differential signature identification (steps 1-4), model construction (steps 5-9), model validation (Steps 10-13), and biomarker interpretation (steps 14-22).

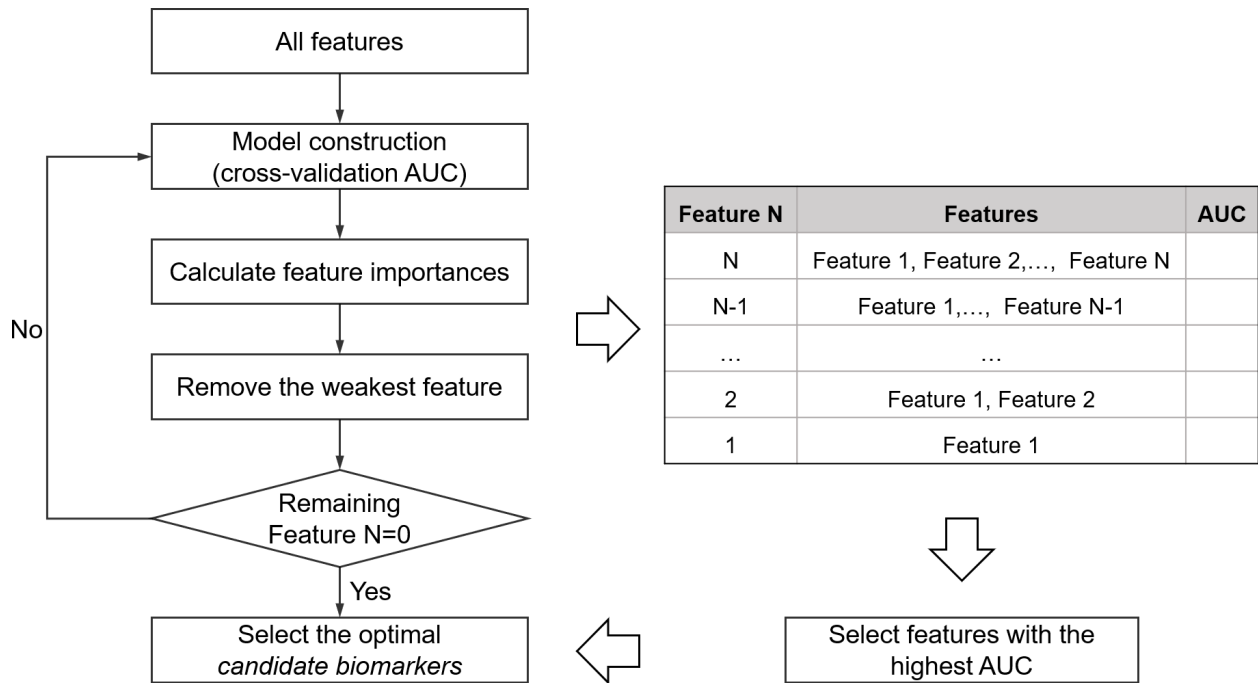

**Supplementary Figure 2. Recursive feature elimination.** The third step of Triple-E feature selection procedure aiming at determining the minimal panel of candidate biomarkers, achieved by recursively removing the weakest feature for model construction per loop to obtain the best panel of features with the highest cross-validation AUC value.

**Supplementary Table 1. Comparison between xMarkerFinder and other tools**

|                                   | <b>xMarkerFinder</b>    | <b>LefSe</b> | <b>NetMoss</b> | <b>SIAMCAT</b> | <b>MIIDL</b> |      |
|-----------------------------------|-------------------------|--------------|----------------|----------------|--------------|------|
| <b>Adenoma vs<br/>Control</b>     | Feature No.             | 15           | 72             | 428            | 10           | 1389 |
|                                   | Cross-validation<br>AUC | 0.75         | 0.66           | 0.61           | 0.64         | 0.68 |
| <b>EBW-CRC vs<br/>EBW-Control</b> | Feature No.             | 15           | 104            | 313            | 444          | 606  |
|                                   | Cross-validation<br>AUC | 0.9          | 0.86           | 0.73           | 0.82         | 0.52 |
| <b>OSCC vs<br/>Control</b>        | Feature No.             | 17           | 60             | 248            | 6            | 60   |
|                                   | Cross-validation<br>AUC | 0.85         | 0.83           | 0.77           | 0.75         | 0.42 |
