# Supplementary material for: Identification and validation of microbial biomarkers from cross-cohort datasets using xMarkerFinder
Source: Springer Nature journal article supplement (doi:10.1038/s41596-024-00999-9), 2024-05-14
Supplement: MOESM3 [file 41596_2024_999_MOESM3_ESM16.xlsx]

## Sheet: example_train_data
	Deinococcus actinosclerus	Bacillus sp. LM 4-2	endosymbiont of Pachyrhynchus infernalis	TM7 phylum sp. oral taxon 957	Oceanisphaera profunda	Desulfitobacterium dehalogenans	Serinicoccus sp. W204	Streptomyces xinghaiensis	Ruegeria sp. AD91A	[Clostridium] saccharolyticum	Euzebyella marina	Cryptobacterium curtum	Pseudomonas mucidolens	Maribacter sp. T28	Thermochromatium tepidum	Psychromicrobium lacuslunae	Bradymonas sp. YN101	Micropruina glycogenica	Aeromonas salmonicida	Rhodothermaceae bacterium	Leuconostoc garlicum	Shewanella psychrophila	Burkholderia sp. THE68	Bifidobacterium angulatum	Rhodococcus sp. MTM3W5.2	Methylobacterium durans	Gloeothece verrucosa	Desulfosarcina ovata	Leptospira interrogans	Beijerinckiaceae bacterium	Candidatus Riesia pediculicola	Oenococcus sp. UCMA 16435	Yersinia massiliensis	Microlunatus phosphovorus	Paracoccus aminovorans	Microbacterium oleivorans	Winogradskyella sp. RHA_55	Saccharomonospora sp. 31sw	Xanthomonadaceae bacterium AQ6-296	Dickeya paradisiaca	Nonlabens marinus	Streptomyces niveus	Kushneria sp. YCWA18	Paenibacillus bovis	Ochrobactrum quorumnocens	Mycoplasma alkalescens	Cobetia marina	Bartonella vinsonii	Colwellia psychrerythraea
CCMD21593359ST-11-0	166	NA	0	0	96	463	0	155	107	12221	465	661	0	128	87	137	NA	115	300	294	0	106	282	935	79	125	158	370	148	126	84	61	0	110	67	0	438	63	101	132	159	264	91	463	333	0	0	0	234
ERR1018192	20	NA	4	78	16	296	31	7	16	5225	91	104	66	35	20	15	NA	18	162	11	4	81	53	9405	7	72	8	293	164	24	26	55	34	58	20	18	107	12	55	40	57	45	27	222	136	26	0	26	129
DRR171561	0	NA	0	0	0	62	0	0	0	1124	161	0	0	0	0	0	NA	0	85	0	0	0	0	0	0	0	77	0	110	157	0	0	0	0	0	0	0	0	0	0	142	0	0	0	0	0	0	0	0
CCIS40244499ST-3-0	33	NA	4	30	243	259	9	13	11	8578	469	80	27	146	16	27	NA	38	110	102	5	53	48	40	18	23	112	111	117	25	9	163	16	25	8	3	59	89	28	59	98	21	20	171	52	36	21	100	183
CCMD72895164ST-21-0	514	NA	1	146	49	542	126	505	60	14074	100	330	113	89	184	139	NA	279	500	443	9	57	135	437	176	217	139	430	147	89	34	181	23	187	317	65	182	114	177	179	135	556	98	425	332	8	130	71	160
DRR171460	0	NA	67	0	0	301	0	0	0	4476	231	0	111	0	0	0	NA	0	95	0	0	0	142	351	0	0	0	111	128	0	84	0	0	0	0	0	197	0	87	91	0	67	0	252	0	0	0	0	459
ERR688525	172	NA	119	0	0	572	97	183	0	10878	74	407	62	240	83	112	NA	173	379	217	0	77	101	649	114	267	232	432	411	72	173	135	0	107	171	114	131	78	82	144	297	361	120	579	171	179	0	85	250
ERR688569	450	NA	0	0	0	514	126	343	72	7448	134	551	81	315	150	99	NA	288	655	266	0	0	251	317	166	174	246	527	325	61	164	71	0	219	166	126	248	103	92	191	80	549	111	406	0	250	0	273	88
ERR688574	408	NA	0	123	0	562	73	183	94	8438	258	669	0	136	153	80	NA	276	397	445	0	67	162	17503	123	156	164	803	306	94	135	178	0	90	128	77	121	93	90	249	237	481	91	358	162	154	0	0	312
DRR171665	106	NA	0	0	60	303	0	109	72	10528	74	134	0	85	0	0	NA	0	696	171	0	60	145	95	0	0	112	207	156	0	0	0	0	0	0	0	0	0	89	77	0	142	93	273	0	0	0	0	0
DRR171663	0	NA	0	0	0	212	0	0	0	3425	0	0	72	106	0	64	NA	117	184	133	0	106	0	434	0	110	0	177	0	0	0	0	0	75	0	0	0	0	0	0	0	183	0	185	0	116	0	0	0
DRR127685	24	0	4	100	61	219	43	99	58	5274	486	274	55	253	61	20	0	43	255	148	38	93	49	827	38	61	88	316	268	57	48	57	87	20	23	25	173	38	101	45	93	100	40	311	69	17	0	47	143
CCMD67373733ST-11-0	893	NA	0	0	236	590	313	526	107	9725	595	552	71	293	314	163	NA	339	1389	563	0	101	297	1044	257	554	156	1007	265	175	0	183	0	303	427	225	153	279	140	337	159	950	117	435	222	0	0	128	244
DRR171716	419	NA	0	0	0	435	124	281	96	12020	148	140	83	238	0	0	NA	548	344	176	0	72	126	1931	171	165	166	566	97	59	0	0	0	119	202	0	0	156	114	131	201	575	73	422	123	102	0	0	113
ERR688534	0	NA	0	0	0	221	0	0	0	5602	0	191	107	0	0	0	NA	0	0	0	0	0	0	336	0	0	254	160	0	99	70	77	0	0	0	0	0	0	0	388	0	75	73	258	0	0	0	0	108
DRR127625	281	0	13	72	74	245	63	130	58	6530	393	233	71	193	366	64	0	96	156	388	0	116	236	623	67	116	227	654	62	53	45	106	34	163	104	54	158	103	85	132	48	367	32	357	105	50	146	44	151
ERR1018307	78	NA	2	36	39	392	35	102	75	11457	93	407	78	93	25	55	NA	25	75	65	57	137	35	1585	37	70	93	344	149	109	61	95	43	66	74	73	108	44	97	87	50	127	114	462	40	67	59	58	125
DRR171945	137	NA	0	85	172	369	0	0	0	14758	63	0	0	91	128	0	NA	107	142	0	101	0	69	983	0	112	173	241	114	0	0	152	0	90	176	0	86	0	165	218	130	172	63	312	0	0	0	0	0
DRR127721	7	0	0	162	24	797	17	6	9	16884	124	43	6	58	13	16	0	37	69	20	0	149	68	98	2	28	75	160	177	44	7	20	13	11	21	12	78	0	48	58	32	95	85	186	272	16	28	20	72
DRR171779	313	NA	0	0	98	563	84	210	0	20351	190	273	157	112	66	89	NA	264	167	199	0	228	150	284	117	148	104	367	107	155	0	175	0	172	143	0	101	176	80	318	258	316	138	400	308	0	0	233	171
CCMD64503764ST-21-0	371	NA	39	50	114	588	186	163	43	30444	142	179	75	241	39	33	NA	108	316	106	0	18	96	200	84	232	239	400	212	109	272	280	13	120	55	80	73	55	68	106	133	282	108	361	38	24	60	30	107
DRR171690	226	NA	0	0	0	139	69	152	0	8897	507	0	0	281	0	80	NA	111	114	108	0	0	89	144	120	125	0	382	0	68	0	127	0	59	79	0	351	0	180	146	300	138	0	131	128	0	0	0	122
DRR171735	139	NA	0	517	0	154	0	0	0	3432	171	5751	0	130	0	0	NA	74	86	0	0	66	0	558	0	0	102	186	103	0	0	106	0	133	0	0	164	0	0	60	0	101	0	243	83	0	0	159	64
ERR688595	106	NA	0	0	0	328	0	80	0	8739	127	686	60	129	62	0	NA	0	127	0	0	88	0	561	0	72	83	181	135	61	0	69	0	0	151	0	70	0	82	67	98	174	0	397	0	0	0	0	95
DRR171858	417	NA	0	0	0	342	101	157	98	10062	150	248	0	139	0	88	NA	336	451	231	0	0	115	327	131	264	243	493	199	0	0	0	0	0	92	0	60	99	0	147	136	136	0	343	0	0	0	0	106
ERR1018191	98	NA	1	100	10	494	8	41	6	9995	81	312	20	21	6	49	NA	24	82	30	3	7	16	2114	31	18	22	116	280	6	50	53	13	35	22	9	30	21	182	31	132	53	30	216	8	14	7	21	30
ERR688521	0	NA	0	370	0	606	0	0	0	13326	281	1076	108	161	0	0	NA	0	187	104	0	61	0	2077	0	0	201	243	237	104	109	334	0	0	93	0	309	0	77	126	219	170	207	779	124	0	0	210	491
ERR688571	0	NA	0	238	0	400	0	0	0	7023	0	68	76	87	0	0	NA	0	0	0	0	0	0	5996	0	0	194	120	218	57	264	95	0	0	0	0	134	0	61	0	0	0	81	469	0	92	0	0	332
DRR171856	0	NA	0	207	0	248	0	126	0	6933	193	59	0	362	0	0	NA	0	114	0	0	152	82	320	0	0	191	214	309	58	0	0	0	0	0	0	111	0	139	58	106	93	0	686	131	0	0	0	129
CCMD35633353ST-11-0	859	NA	150	144	100	1161	295	575	238	14422	627	1632	113	377	299	190	NA	589	3224	521	0	141	428	2190	341	393	138	1271	335	134	164	275	0	311	511	340	134	229	275	465	215	974	164	958	390	124	0	146	126
DRR171739	137	NA	0	196	0	227	0	0	0	5390	100	357	0	172	0	57	NA	188	0	0	0	96	0	186	0	0	227	125	209	0	0	86	0	0	0	0	93	71	0	60	76	115	0	364	0	0	0	0	76
CCMD79349503ST-11-0	158	NA	0	0	0	187	0	68	0	3655	0	137	0	68	0	0	NA	74	184	0	0	67	115	515	0	0	107	251	89	65	0	66	0	0	146	103	0	71	0	0	0	187	0	230	133	0	0	0	0
CCIS87167916ST-4-0	1371	NA	0	20	59	417	305	1020	63	1906	23	194	89	6	445	193	NA	490	774	421	4	11	566	849	584	552	16	643	13	180	1	7	8	326	366	254	8	557	142	281	30	1244	55	220	148	0	154	3	18
DRR171817	116	NA	0	0	0	239	0	119	158	8609	155	177	0	74	0	0	NA	0	0	0	0	0	137	121	72	0	60	178	0	74	0	0	0	0	0	91	201	0	0	66	0	313	0	252	0	0	0	0	316
CCIS41548810ST-4-0	812	NA	1	12	59	436	236	228	122	7737	76	341	98	41	134	118	NA	441	448	359	6	39	272	634	220	455	118	909	72	95	7	29	32	182	260	133	44	180	144	255	83	611	115	413	107	34	176	34	74
DRR171906	307	NA	0	202	445	740	95	121	0	3405	780	164	0	424	89	0	NA	83	372	863	0	123	124	1157	109	228	91	397	374	62	0	73	0	203	135	0	255	213	161	200	548	329	81	307	149	429	0	0	69
CCIS12656533ST-4-0	204	NA	45	67	30	404	116	148	61	3459	244	516	66	112	220	56	NA	119	328	184	1	52	89	679	93	110	166	359	211	42	77	118	3	82	119	82	162	94	90	105	111	261	51	324	109	70	59	200	70
ERR688644	144	NA	0	0	178	159	240	111	0	2382	96	327	248	510	0	0	NA	308	1854	441	0	0	0	185	0	0	0	190	0	209	0	0	0	270	0	0	0	0	154	289	0	353	0	145	342	0	0	0	0
DRR171734	0	NA	0	194	0	264	0	74	0	10301	0	138	60	172	0	0	NA	0	56	87	343	71	0	0	0	0	140	184	179	0	0	106	0	0	0	0	82	0	0	145	157	98	0	232	0	0	0	68	0
DRR171670	92	NA	0	0	68	590	104	84	158	19377	430	657	0	265	0	0	NA	201	134	241	0	74	0	645	0	119	272	409	447	134	71	149	0	63	66	0	234	0	141	91	67	96	90	822	142	185	0	108	310
ERR688532	0	NA	0	0	0	109	0	0	0	3434	0	85	0	0	0	0	NA	0	0	0	0	0	0	159	0	0	0	147	0	0	0	0	0	0	0	0	0	0	0	0	0	0	0	156	0	0	0	0	0
ERR1018211	677	NA	46	518	24	390	120	344	41	4890	65	308	35	201	71	117	NA	231	320	482	4	104	294	1533	184	329	267	605	211	53	15	55	15	154	156	149	250	92	105	260	235	561	135	303	92	155	94	118	239
CCMD90311071ST-21-0	209	NA	14	34	102	352	104	116	62	9465	342	398	24	149	124	75	NA	185	486	231	29	141	83	299	84	150	175	406	181	75	46	139	22	119	109	60	119	93	97	85	138	255	90	395	104	28	64	52	335
ERR1018206	54	NA	0	149	626	226	10	36	36	6625	472	50	4	798	10	19	NA	5	19	165	0	33	19	8697	17	3	18	60	86	24	32	11	29	9	78	35	33	134	11	30	27	75	39	97	60	15	0	5	293
CCIS29688262ST-20-0	55	NA	5	337	178	1026	53	69	29	18863	242	308	119	185	43	32	NA	26	113	83	2	87	31	1651	36	34	319	406	324	308	206	439	9	39	79	26	325	26	89	40	116	209	64	1139	111	112	0	333	918
DRR171605	591	NA	0	0	0	322	141	259	116	3110	212	131	154	230	116	133	NA	251	271	340	0	181	248	380	186	191	300	431	205	74	0	114	0	119	174	72	154	185	102	136	261	429	69	206	152	0	0	0	75
DRR127628	135	0	5	53	16	317	30	49	195	7138	81	183	50	60	14	39	0	97	147	189	10	52	44	531	88	82	79	152	258	46	19	33	14	77	137	33	58	87	61	171	96	83	31	208	35	35	0	17	36
DRR171691	100	NA	0	451	0	438	0	84	0	7556	510	252	0	251	65	70	NA	224	117	0	180	370	0	254	0	149	221	328	216	0	0	80	0	117	0	0	161	80	153	189	147	210	65	502	0	0	0	0	198
DRR171802	0	NA	0	920	0	194	0	0	0	6186	475	202	0	261	0	0	NA	0	175	0	0	77	0	115	0	0	104	132	137	113	85	203	0	0	0	0	72	0	93	114	71	105	0	505	0	0	0	0	0
CCIS07648107ST-4-0	182	NA	3	107	88	492	90	62	114	12139	250	375	73	322	70	39	NA	68	211	182	6	128	154	1368	29	61	148	352	121	117	82	108	0	81	69	50	202	36	275	115	173	64	66	460	230	63	0	126	286
DRR171821	0	NA	0	0	0	315	0	143	0	7050	301	138	0	133	0	0	NA	333	110	0	0	425	105	385	0	101	78	161	102	0	0	0	0	106	0	0	95	0	0	0	90	83	87	317	0	0	0	0	110
DRR171724	85	NA	0	0	0	1819	0	88	93	26834	1018	0	0	1097	0	107	NA	788	0	143	0	1166	0	301	0	100	0	492	786	87	0	74	0	0	0	0	166	0	140	108	0	146	595	2363	384	0	0	142	0
CCMD92404903ST-11-0	0	NA	0	0	205	288	0	0	224	2605	0	411	196	0	90	0	NA	0	376	0	0	0	205	1587	127	85	118	666	160	0	0	0	0	245	0	121	138	0	265	156	0	381	109	512	116	0	0	136	0
DRR171750	901	NA	0	0	0	714	258	400	194	9229	212	329	251	230	153	95	NA	359	437	611	0	145	224	640	284	495	350	1084	184	143	0	0	0	231	218	155	295	282	154	523	260	857	112	440	158	0	0	64	165
CCMD95433940ST-21-0	312	NA	1	255	278	616	215	138	174	27263	218	379	184	187	345	109	NA	66	305	167	107	135	65	1037	68	92	216	550	422	150	72	99	11	60	427	99	434	58	208	240	273	181	117	1365	443	39	179	100	188
DRR171941	200	NA	0	0	0	265	62	133	0	4471	96	177	0	93	0	0	NA	68	163	0	0	89	171	1470	97	110	65	288	145	0	0	0	0	68	94	70	100	0	84	159	0	237	0	312	0	0	0	0	0
ERR688614	281	NA	0	0	60	370	115	310	0	10288	118	308	75	114	0	81	NA	161	782	324	0	0	151	1117	102	164	86	518	90	88	0	0	0	160	145	103	100	95	108	193	112	399	101	381	135	0	0	0	145
CCIS82507866ST-3-0	32	NA	26	11	7	162	6	11	11	6410	102	74	33	91	16	15	NA	20	127	27	7	34	14	92	14	22	49	108	233	21	49	110	7	21	5	11	168	16	34	37	62	50	8	284	35	19	23	40	242
CCIS27304052ST-3-0	46	NA	40	37	21	269	6	15	13	8070	81	140	66	179	17	8	NA	47	100	26	10	61	22	171	12	20	186	168	286	13	73	73	1	31	20	30	155	44	28	46	95	67	29	204	53	47	0	111	128
DRR171805	0	NA	0	0	0	259	0	0	0	14244	0	0	0	0	0	0	NA	0	102	0	0	84	0	0	0	0	0	167	199	0	0	0	0	0	0	0	0	0	98	96	0	85	76	77	0	0	0	0	0
DRR171515	115	NA	0	0	0	483	76	0	0	22884	71	133	0	65	0	102	NA	0	0	0	0	0	99	718	85	0	131	261	238	88	0	0	0	0	87	0	150	0	0	152	0	221	0	386	0	70	0	0	200
DRR127708	311	0	0	33	93	292	62	227	127	12032	283	129	43	64	86	81	0	150	230	399	2	23	236	381	109	176	55	532	173	107	17	98	5	106	148	56	63	100	39	145	99	377	67	224	40	18	100	74	98
CCMD76409700ST-11-0	479	NA	0	0	0	400	151	190	101	5184	145	403	67	66	135	73	NA	332	1185	195	0	0	171	1262	114	128	93	427	174	0	0	89	0	223	238	149	65	89	144	261	133	383	90	353	200	0	0	125	0
ERR688646	188	NA	0	0	121	500	0	147	99	14527	75	191	87	108	136	133	NA	91	139	193	0	0	87	2107	0	105	196	315	117	114	0	0	0	97	109	92	86	58	67	76	188	207	115	577	0	0	0	205	124
ERR688606	340	NA	0	0	0	646	93	115	154	7957	67	199	90	157	67	114	NA	276	452	0	0	107	79	324	0	164	211	472	95	151	70	0	0	81	0	116	61	61	238	92	0	394	130	337	96	0	0	0	0
DRR171621	248	NA	104	0	56	807	0	184	115	12602	126	357	60	228	69	114	NA	98	157	162	0	95	61	1426	89	104	77	440	221	0	0	126	0	76	66	160	154	0	146	188	130	294	95	431	0	0	0	98	145
CCMD99440714ST-11-0	167	NA	0	369	0	450	0	132	97	8801	92	178	66	0	0	142	NA	89	151	133	0	0	110	392	0	133	203	419	117	86	0	0	0	95	146	0	61	60	185	180	107	170	57	714	0	0	0	226	0
DRR171965	0	NA	0	0	0	548	0	103	0	3623	755	0	0	886	0	0	NA	0	129	156	0	444	0	62	0	0	0	232	375	0	0	161	0	0	0	0	635	0	175	0	83	0	185	535	560	0	0	0	330
ERR688550	209	NA	0	0	85	629	0	199	59	18460	73	274	158	66	0	134	NA	94	544	91	0	101	100	10629	103	130	196	384	157	182	135	0	0	86	108	136	0	0	177	140	193	369	169	630	82	0	0	214	232
ERR688651	359	NA	0	0	0	470	0	145	86	19782	104	235	0	104	0	0	NA	74	436	119	0	0	0	411	128	150	135	374	258	65	0	130	0	61	89	0	126	0	88	97	83	250	61	525	83	0	0	76	308
DRR171776	172	NA	0	0	0	405	0	0	0	6248	87	0	114	109	61	0	NA	83	371	0	0	108	162	978	0	162	84	266	210	0	0	0	0	124	66	73	70	0	170	173	89	275	81	221	0	0	0	0	0
DRR171549	0	NA	0	0	0	566	0	0	0	11965	423	73	126	359	0	0	NA	226	119	0	0	379	137	200	0	75	277	473	130	0	0	93	0	0	0	0	473	81	0	144	0	111	0	257	338	0	0	97	409
DRR171855	253	NA	0	76	690	188	0	142	100	5114	1668	106	68	345	0	113	NA	76	936	876	0	61	326	498	113	221	130	392	490	102	0	0	0	220	140	111	179	552	56	146	150	256	0	270	81	75	0	123	469
DRR171733	113	NA	0	121	0	520	0	85	122	13912	1323	164	97	1050	100	0	NA	92	233	93	0	164	152	312	87	175	88	566	128	0	0	92	0	71	81	114	324	81	521	90	519	255	427	664	268	0	0	140	363
ERR688637	147	NA	0	0	1254	347	0	69	0	5656	2556	131	0	353	0	143	NA	121	872	548	0	0	0	893	0	82	80	205	582	0	0	91	0	69	396	144	131	523	60	119	217	131	0	327	77	0	0	101	361
ERR1018278	76	NA	3	23	29	383	13	66	17	27140	113	137	32	86	14	59	NA	118	48	95	0	59	42	151	36	91	124	132	95	42	27	66	3	18	25	33	49	22	24	16	64	105	32	255	62	4	0	78	158
DRR171874	0	NA	0	0	57	219	0	0	0	9605	335	191	67	188	0	0	NA	127	123	0	0	226	0	205	0	108	196	258	69	0	0	0	0	0	0	0	0	0	0	0	207	118	82	213	0	0	0	180	0
DRR171483	104	NA	0	586	0	373	0	75	0	9800	79	831	0	98	0	72	NA	202	127	0	0	64	0	243	0	64	118	341	94	0	85	139	0	120	0	0	163	0	86	178	213	187	0	554	107	0	0	0	116
CCMD31134579ST-11-0	355	NA	0	88	458	475	206	228	96	4978	828	317	88	298	126	99	NA	186	740	345	0	60	269	413	138	199	109	675	219	74	64	143	0	127	294	85	99	150	118	153	228	559	99	382	130	0	0	201	193
ERR1018309	414	NA	86	162	73	922	249	240	158	16567	149	857	126	63	198	147	NA	176	611	411	45	27	147	815	167	274	133	698	203	167	38	22	174	136	301	163	67	202	101	283	336	469	236	1021	171	129	94	36	183
DRR171948	174	NA	0	0	0	323	0	96	0	22136	430	146	0	346	0	66	NA	136	179	138	0	144	153	2480	0	64	128	453	315	0	0	121	0	0	0	0	288	0	302	86	196	114	120	573	141	118	0	0	153
ERR688533	305	NA	0	105	0	477	68	169	0	12981	96	514	91	465	67	102	NA	127	169	213	0	199	140	3321	91	228	93	364	146	83	64	253	0	92	120	121	197	0	164	146	283	314	95	536	73	0	0	257	294
DRR171529	138	NA	0	0	0	484	0	115	0	13084	828	235	65	367	0	0	NA	661	116	0	0	0	122	79	0	75	109	439	167	0	0	161	0	65	0	77	382	0	378	72	141	149	62	436	129	0	0	98	513
DRR171497	144	NA	0	0	0	157	0	123	0	5778	618	111	84	371	0	0	NA	188	73	147	0	158	82	833	0	73	0	259	76	0	0	143	0	0	96	0	299	62	270	102	0	189	0	269	82	0	0	0	418
DRR171653	404	NA	76	90	134	439	206	305	227	10307	137	159	0	266	0	0	NA	184	90	150	0	85	0	435	137	173	316	495	215	75	157	184	0	64	248	59	163	254	0	84	344	490	104	350	0	0	0	551	1986
CCMD26925580ST-21-0	242	NA	2	16	23	295	71	208	70	6686	79	295	52	100	75	136	NA	182	209	196	0	77	187	1394	90	179	94	335	131	93	9	105	19	119	113	93	82	140	158	123	92	401	60	465	206	9	43	143	52
DRR127638	19	0	1	33	7	96	11	23	15	4375	211	57	8	52	4	47	0	125	27	16	0	34	20	114	7	35	1129	63	85	39	3	31	0	14	13	6	29	3	39	57	35	24	6	106	9	18	20	13	73
CCIS21278152ST-4-0	361	NA	2	52	70	357	117	153	69	13315	380	298	59	122	117	85	NA	177	204	234	1	38	116	406	140	170	185	471	227	53	19	197	22	125	194	54	180	92	78	134	113	379	65	398	98	39	118	91	89
DRR171746	120	NA	0	0	0	414	0	0	134	22654	249	180	92	236	0	81	NA	0	91	85	0	63	80	662	0	93	173	480	230	97	59	61	0	0	0	75	118	0	129	186	0	134	93	545	0	124	0	113	161
DRR127491	60	0	3	50	60	172	13	26	37	3600	67	120	18	34	21	27	0	8	49	108	0	35	57	667	13	7	75	132	31	51	19	35	2	28	44	105	36	29	20	32	36	120	45	239	16	10	9	25	134
DRR171864	415	NA	0	0	942	206	70	70	0	3896	1439	67	0	253	70	0	NA	102	137	588	0	0	72	477	82	128	138	366	380	138	0	90	0	99	199	115	551	584	0	136	132	194	0	286	101	0	0	0	440
ERR1018238	185	NA	1	251	186	443	128	99	58	22031	183	166	82	115	87	60	NA	100	128	248	60	131	65	2731	34	110	25	482	307	81	55	146	29	68	159	181	124	151	59	511	70	203	59	426	70	59	63	114	159
ERR688617	214	NA	0	0	0	636	68	83	0	7838	0	138	123	176	0	0	NA	120	312	139	0	0	0	368	0	100	166	469	133	152	106	160	0	89	89	124	0	0	197	0	112	307	102	598	107	0	0	0	104
CCMD59583015ST-11-0	287	NA	0	408	83	626	109	205	70	21235	197	754	0	283	73	167	NA	132	600	255	0	265	107	5791	119	157	409	1032	292	150	0	181	0	179	129	155	321	88	228	704	322	537	149	1065	94	71	0	0	175
DRR127537	14	0	2	129	6	194	19	7	74	2493	7	60	125	17	112	77	0	3	75	38	4	11	178	5978	90	53	22	102	14	20	12	18	78	59	6	71	32	119	22	71	141	84	60	191	29	19	0	2	4
CCMD49461418ST-11-0	406	NA	0	0	0	968	111	212	114	9925	1300	681	0	236	611	89	NA	92	1226	312	0	0	231	329	203	151	65	7519	1036	128	0	86	0	88	182	172	166	121	78	206	260	402	162	442	64	74	0	162	312
ERR1018200	139	NA	10	1088	80	581	26	19	70	13915	83	197	70	174	270	159	NA	30	231	69	0	48	35	1284	89	64	252	617	263	99	55	87	119	149	202	79	116	55	63	127	213	176	30	740	87	33	250	70	146
CCIS64785924ST-20-0	22	NA	2	17	14	111	3	23	13	3583	59	321	4	38	20	5	NA	24	25	9	5	40	6	808	7	12	66	91	48	22	9	14	1	10	46	23	13	7	10	13	43	29	13	104	36	12	7	15	26
DRR171574	425	NA	0	0	89	356	73	217	68	8452	180	177	60	127	0	0	NA	138	182	144	0	0	70	424	72	277	297	539	162	65	0	173	0	77	214	136	109	140	155	164	66	408	60	407	89	0	0	0	96
ERR1018283	33	NA	2	18	5	170	4	53	7	3419	40	191	68	24	37	33	NA	19	57	72	41	63	25	1977	36	59	56	128	156	35	16	69	49	23	38	41	51	44	7	40	6	44	18	267	46	8	0	23	32
ERR688564	318	NA	0	185	58	992	239	232	0	27447	179	361	134	180	94	120	NA	207	207	275	0	150	144	5401	106	196	309	420	425	143	0	340	0	224	239	131	138	81	184	147	193	543	184	673	185	67	0	92	157
DRR171714	0	NA	0	0	0	338	0	0	0	10308	0	0	0	286	0	0	NA	0	0	0	0	0	0	59	0	0	0	96	1096	0	0	0	0	0	0	0	632	0	0	0	0	0	0	82	0	0	0	0	322
CCIS22958137ST-20-0	234	NA	13	91	127	880	80	81	66	17428	357	368	88	309	74	75	NA	53	270	279	85	120	118	447	106	95	576	372	271	212	43	282	15	46	103	24	242	94	163	145	427	159	160	1086	191	82	94	129	336
DRR171554	120	NA	0	0	0	422	0	0	62	8918	695	224	0	680	0	0	NA	158	163	142	0	275	128	576	0	144	279	522	128	58	0	183	0	0	0	65	523	72	259	108	121	177	0	378	323	0	0	0	502
DRR171518	0	NA	0	0	0	127	0	0	0	4030	0	0	0	0	0	0	NA	0	80	0	0	0	0	247	0	0	0	111	0	0	0	0	0	0	0	0	0	0	0	0	0	83	0	97	0	0	0	0	0
CCMD13071240ST-21-0	411	NA	16	61	64	884	113	218	80	14672	170	489	65	70	79	161	NA	317	539	248	80	60	106	637	109	129	228	454	302	65	105	223	113	196	133	103	315	120	89	217	264	462	150	445	102	81	94	66	100
DRR171673	233	NA	0	0	0	483	135	278	0	7833	209	170	77	174	74	66	NA	114	117	197	0	0	92	193	159	240	331	416	160	80	0	177	0	155	125	83	113	177	137	113	133	389	109	350	108	0	0	0	177
ERR1018288	208	NA	0	45	12	258	26	106	20	3366	77	285	49	20	84	16	NA	210	536	227	6	27	38	518	83	152	20	214	73	59	12	23	3	65	48	54	17	31	56	117	41	285	26	128	99	2	36	14	62
DRR171572	124	NA	0	0	0	377	0	86	0	8193	201	307	68	90	0	73	NA	161	151	274	0	305	150	655	169	253	154	321	93	0	0	62	0	0	0	74	201	65	78	269	86	140	59	402	76	0	0	0	0
CCMD74930188ST-21-0	78	NA	17	2	61	314	14	48	43	9311	116	216	67	105	33	18	NA	19	132	127	0	148	47	103	25	46	187	256	283	115	25	72	7	28	39	22	149	30	29	56	63	101	55	434	40	14	18	28	251
DRR171567	194	NA	0	0	74	289	0	150	67	12705	215	120	0	443	0	106	NA	332	187	189	0	83	0	401	0	126	201	286	140	172	67	154	0	77	102	104	72	119	241	154	147	234	0	359	76	0	0	0	104
ERR688618	365	NA	0	0	0	595	81	228	62	6855	97	444	0	112	102	66	NA	206	301	347	0	69	129	2619	184	152	229	334	275	129	0	255	0	130	138	97	74	91	58	160	188	537	76	492	109	0	0	150	159
ERR1018312	72	NA	6	507	6	325	60	48	49	8541	125	208	53	39	27	48	NA	46	337	59	3	24	54	945	72	92	132	316	162	91	48	49	118	62	91	27	65	51	78	85	10	123	93	450	116	8	0	56	110
CCIS10706551ST-3-0	43	NA	85	63	40	473	7	12	41	6976	290	142	40	520	30	94	NA	40	126	56	0	106	50	144	16	19	278	168	265	38	154	102	2	30	40	12	127	22	82	32	220	36	12	342	134	26	0	37	243
ERR688515	733	NA	0	0	80	629	189	271	86	15791	113	912	0	97	112	198	NA	350	360	515	0	71	280	767	219	277	136	565	255	81	0	271	0	190	321	183	273	196	197	290	155	626	129	659	242	127	0	153	201
DRR171879	75	NA	0	0	71	0	0	0	0	877	263	0	0	62	0	0	NA	0	0	208	0	0	0	153	106	0	67	241	0	0	0	0	0	99	0	0	0	120	0	0	0	0	0	76	0	0	0	0	219
CCIS93040568ST-20-0	2	NA	1	30	26	70	0	10	5	2365	31	12	1	28	23	9	NA	0	20	0	0	14	13	44	0	7	35	31	13	10	31	16	3	1	11	2	32	1	3	10	31	2	6	128	2	10	0	4	33
DRR171474	0	NA	0	0	75	148	0	0	0	8555	84	100	0	0	0	0	NA	0	88	0	0	79	0	202	0	0	82	103	89	0	68	96	0	0	0	0	0	0	0	0	74	0	0	342	0	0	0	0	0
ERR1018232	333	NA	6	153	50	488	235	242	150	13536	131	333	38	230	110	179	NA	237	577	228	752	88	122	801	118	225	200	553	258	132	57	137	14	132	131	124	186	80	220	168	136	446	113	504	170	73	155	67	127
DRR162777	34	0	0	30	27	184	40	11	25	8105	179	79	56	74	15	53	0	17	25	59	0	21	45	5931	74	12	96	141	234	55	25	25	11	48	59	36	140	16	44	78	36	46	25	473	9	56	20	22	94
CCIS98832363ST-4-0	326	NA	119	33	124	676	98	165	108	9526	445	1062	58	372	96	81	NA	178	547	328	12	72	97	579	89	126	238	1983	292	111	117	213	32	93	207	87	143	158	117	220	180	333	99	553	140	73	97	130	192
ERR1018311	463	NA	3	61	55	672	127	280	76	29311	131	495	162	110	116	142	NA	244	421	282	6	101	93	517	152	340	220	473	236	95	21	148	53	248	264	184	158	166	179	177	159	393	105	755	166	79	95	135	129
CCMD72666896ST-11-0	0	NA	0	0	153	798	0	122	0	3426	169	85	0	182	0	0	NA	261	313	0	0	134	0	1903	0	0	0	282	671	0	0	177	0	0	0	0	73	0	169	0	87	153	0	305	0	0	0	63	906
ERR1018302	19	NA	2	44	23	142	12	14	18	3379	59	52	28	38	5	26	NA	6	133	24	0	18	18	25	10	21	42	114	87	22	22	4	2	9	8	10	33	7	9	34	20	25	22	142	26	11	14	38	160
ERR1018303	291	NA	4	313	60	250	129	160	97	9328	185	189	83	212	95	107	NA	193	250	296	3	71	185	348	191	360	106	569	111	114	10	87	7	100	116	154	120	106	62	184	81	455	135	313	69	5	86	32	227
DRR171607	99	NA	0	0	0	142	0	78	0	16492	96	83	0	0	0	62	NA	73	261	0	0	108	0	58	0	0	128	349	104	0	0	69	0	0	0	0	0	100	0	66	0	114	0	242	0	0	0	0	79
CCIS82944710ST-20-0	8	NA	1	3	0	89	2	3	4	3886	15	65	7	8	8	2	NA	4	27	20	4	3	5	60	2	4	39	57	36	6	18	7	0	10	13	7	38	3	7	7	31	14	12	68	5	4	0	20	21
CCMD86707194ST-21-0	103	NA	16	103	66	702	69	98	56	17615	307	503	49	175	61	61	NA	150	154	131	11	185	143	9598	59	112	222	342	128	140	229	49	23	76	120	41	295	56	112	219	75	172	92	772	230	141	118	90	271
DRR171861	0	NA	0	223	86	123	0	0	0	6545	680	243	0	470	0	0	NA	0	74	0	0	110	127	763	0	153	98	132	167	83	85	158	0	0	0	116	0	0	94	136	94	0	58	1015	0	0	0	0	301
DRR171810	164	NA	0	898	0	353	0	221	111	5383	177	841	106	191	95	132	NA	122	327	0	0	136	70	1220	68	106	174	610	96	140	0	92	0	95	135	105	71	83	203	210	139	391	100	337	0	0	0	0	420
CCIS53043478ST-4-0	226	NA	1	11	33	271	51	105	40	3089	224	162	31	80	93	61	NA	89	165	269	2	51	70	326	79	147	155	296	179	85	30	50	12	45	92	66	153	58	58	67	86	186	81	259	70	20	35	39	56
CCMD10191450ST-11-0	891	NA	0	0	0	421	319	670	117	3068	0	174	149	0	173	89	NA	535	653	280	0	71	322	83543	371	509	94	642	118	71	0	98	0	526	265	136	0	380	255	343	78	1245	92	350	65	0	347	0	0
DRR171950	0	NA	0	0	0	745	0	0	58	21009	833	238	0	561	0	0	NA	217	135	0	0	363	68	959	0	0	234	603	306	201	0	236	0	143	0	0	287	0	178	114	69	183	218	1168	321	0	0	135	254
DRR171620	170	NA	0	0	0	550	68	101	64	10305	489	217	0	426	58	0	NA	227	129	137	0	0	101	631	92	161	122	329	187	60	0	91	0	173	78	115	308	85	147	106	290	282	0	314	254	0	0	0	241
DRR171519	0	NA	0	0	0	256	0	0	0	11072	642	67	111	528	0	101	NA	0	68	0	0	72	70	66	0	178	0	419	97	237	0	0	0	252	0	0	250	94	131	100	117	0	291	365	0	0	0	0	112
ERR1018261	57	NA	2	102	37	377	80	6	34	15556	95	129	92	167	45	89	NA	99	69	73	0	44	10	853	12	41	134	229	301	78	27	86	33	84	126	55	84	15	23	134	46	107	53	694	37	44	0	136	82
DRR171966	615	NA	0	0	267	452	67	228	121	9998	1746	142	156	416	59	143	NA	97	669	891	0	113	455	1364	159	357	151	726	685	151	0	0	0	171	312	94	95	566	96	139	150	518	146	215	129	474	0	106	609
DRR127713	46	0	0	162	0	58	2	1	18	3269	97	52	2	54	7	4	0	5	8	98	22	14	3	73	2	15	28	47	143	24	30	4	0	10	15	9	102	8	20	25	3	28	16	154	12	24	0	81	99
CCMD18829815ST-11-0	157	NA	0	0	0	365	0	0	0	12413	0	168	84	99	0	70	NA	0	161	133	0	0	0	138	0	193	111	164	125	108	0	0	0	102	96	0	89	0	0	77	73	169	0	388	87	0	0	147	105
DRR127521	131	0	9	14	4	547	61	41	169	15264	357	457	73	346	51	112	0	104	583	322	88	200	156	745	38	280	283	600	341	81	104	157	15	111	233	65	206	55	90	70	113	116	62	547	133	19	14	86	169
DRR171542	0	NA	0	280	0	414	0	0	0	11991	698	79	0	230	0	0	NA	0	74	0	0	0	0	655	0	0	71	207	175	58	0	78	0	0	0	0	0	0	102	79	302	74	0	213	0	0	0	0	203
CCIS38765456ST-20-0	521	NA	53	109	89	740	219	273	152	10268	1368	923	135	512	147	86	NA	301	317	229	20	135	178	537	190	193	355	684	945	74	102	317	16	202	213	173	1029	165	134	425	322	453	76	735	101	166	144	163	150
ERR688578	277	NA	0	0	0	299	185	270	0	5268	131	231	62	118	138	93	NA	128	980	378	0	0	64	268	334	434	101	481	110	83	0	0	0	228	150	98	97	102	68	155	0	432	0	323	70	0	0	75	78
DRR171562	0	NA	0	92	0	77	0	0	0	2274	159	0	0	69	0	0	NA	91	72	0	0	0	0	101	0	0	0	72	0	0	0	0	0	0	0	0	81	0	58	80	0	105	0	122	0	0	0	0	89
CCMD59540613ST-11-0	208	NA	0	343	104	220	0	116	128	7148	299	245	0	0	81	0	NA	66	900	137	0	0	360	560	0	111	150	428	0	107	0	0	0	100	86	0	179	125	131	151	268	257	86	334	126	0	0	0	82
ERR688591	0	NA	0	0	0	513	0	0	66	14374	115	513	0	0	0	0	NA	0	119	0	0	0	0	6486	93	0	301	204	95	178	165	82	0	0	0	0	110	0	126	0	164	0	77	698	0	0	0	79	177
DRR171767	172	NA	0	0	0	484	0	165	101	12755	157	225	112	240	0	103	NA	107	205	150	0	123	228	376	154	189	136	580	129	152	0	92	0	126	103	74	126	145	146	155	257	250	153	365	112	0	0	99	151
DRR171586	194	NA	0	0	89	537	141	162	0	4242	552	347	0	172	181	0	NA	109	364	337	0	92	145	1610	191	437	115	665	174	105	0	0	0	153	182	111	65	188	178	175	254	376	98	308	105	115	0	0	0
DRR171847	0	NA	0	2930	0	333	0	0	107	5685	163	179	0	102	0	0	NA	0	305	0	207	129	292	492	0	77	193	158	205	0	157	107	0	0	0	111	183	0	76	0	0	115	0	176	0	0	0	132	552
DRR171860	0	NA	0	198	95	679	0	0	0	8976	631	241	0	151	0	0	NA	0	171	114	0	232	80	124	0	0	0	223	156	67	0	235	0	0	0	0	94	0	74	105	119	89	139	833	113	0	0	0	69
ERR1018222	676	NA	5	31	39	369	187	233	30	4430	144	301	56	149	85	99	NA	361	325	690	33	46	217	363	191	297	127	655	380	85	38	54	16	301	207	186	158	294	72	116	123	726	108	357	143	29	85	35	66
DRR127583	346	0	9	40	30	380	124	293	60	8363	172	195	112	93	39	93	0	213	204	162	4	181	137	288	48	270	88	477	228	89	34	29	37	56	131	123	100	160	42	146	116	396	160	279	33	35	66	50	46
CCMD23541216ST-11-0	343	NA	0	0	0	383	0	113	0	5921	88	402	105	204	0	0	NA	87	233	114	0	0	217	176	139	250	87	323	227	104	0	123	0	85	180	0	104	72	124	121	182	360	0	380	136	0	0	0	91
DRR171576	0	NA	0	0	0	0	0	0	0	303	0	0	0	0	0	0	NA	0	0	0	0	0	0	0	0	0	0	0	0	0	0	0	0	0	0	0	0	0	0	0	0	0	0	0	0	0	0	0	0
DRR171813	154	NA	0	0	0	476	0	136	0	14865	145	228	113	88	0	0	NA	0	141	125	0	0	62	362	137	125	173	255	138	130	95	67	0	86	113	0	120	0	60	122	100	184	58	638	112	69	0	0	123
DRR171730	0	NA	0	415	0	84	0	0	0	3285	723	106	0	243	0	0	NA	0	168	233	0	169	66	233	0	0	0	194	100	0	0	99	0	0	141	0	93	216	102	99	150	80	0	197	79	0	0	0	291
ERR1018228	436	NA	0	111	144	685	101	239	100	9880	394	343	163	152	127	96	NA	194	999	169	3	100	150	2307	126	395	352	888	258	159	76	84	375	136	238	163	186	126	192	321	150	537	181	716	167	14	220	77	416
DRR171748	153	NA	0	0	134	228	0	0	0	5885	176	94	0	0	192	0	NA	70	160	0	0	0	0	968	0	0	141	430	159	0	65	0	0	87	285	136	93	0	67	92	162	77	79	429	105	0	0	0	115
ERR1018231	154	NA	27	30	27	589	44	66	61	4204	378	112	26	369	90	101	NA	117	194	172	5	60	53	200	62	94	108	238	199	27	39	60	17	97	49	52	104	135	86	74	384	122	85	220	81	27	99	22	315
ERR688506	357	NA	0	0	0	867	0	128	0	19285	272	955	0	165	78	59	NA	94	262	219	0	982	0	1811	80	307	167	506	482	113	152	196	0	71	235	141	355	0	114	102	342	287	115	786	140	229	0	182	120
DRR171763	106	NA	0	326	90	176	0	154	0	8624	93	275	82	186	74	96	NA	0	113	153	0	142	116	241	0	106	112	377	119	70	0	158	0	70	0	66	0	0	0	160	0	181	92	554	0	0	0	0	120
DRR127509	58	0	1	52	66	300	31	58	16	8114	486	95	53	229	26	37	0	57	113	86	0	182	39	362	33	66	157	352	79	57	80	178	3	57	64	42	778	35	186	110	125	160	57	463	111	23	43	18	458
CCMD73128545ST-11-0	337	NA	0	0	69	424	77	227	70	6673	86	155	128	87	0	0	NA	69	377	106	0	0	286	155	0	217	120	378	129	163	0	0	0	75	393	0	108	136	155	82	92	215	80	247	96	0	0	0	90
DRR171711	375	NA	0	0	164	333	0	81	146	4978	974	271	0	375	74	326	NA	172	342	573	0	135	83	319	0	257	147	1521	380	0	0	195	0	149	229	0	323	160	251	287	317	191	120	421	120	0	0	231	278
DRR171558	0	NA	0	350	0	263	0	0	72	8778	820	0	0	353	0	0	NA	0	0	0	0	104	0	0	0	0	0	346	216	0	60	169	0	0	0	0	329	0	350	0	0	0	0	272	131	0	0	0	337
DRR171771	0	NA	0	0	130	127	0	0	0	5678	554	75	0	211	0	0	NA	128	125	137	0	130	0	182	0	0	73	159	227	0	0	0	0	0	0	0	0	124	0	69	130	88	0	318	0	0	0	0	87
DRR127674	93	0	8	34	13	407	84	187	65	5069	462	132	27	262	65	58	0	249	110	109	0	210	76	405	75	235	129	300	111	41	20	187	143	68	50	55	64	30	92	49	163	150	76	224	80	17	0	31	660
ERR1018281	438	NA	2	54	32	220	153	204	79	4860	144	178	42	132	92	102	NA	169	234	271	2	67	110	262	117	93	104	281	98	80	11	36	103	95	156	103	85	102	99	195	64	429	49	299	73	4	43	9	46
CCIS03857607ST-4-0	222	NA	31	101	68	709	71	128	33	12280	733	308	47	146	231	43	NA	123	457	249	7	63	97	10484	113	71	241	359	465	67	80	207	27	75	159	63	223	265	74	120	359	244	73	677	101	107	55	124	196
ERR1018295	114	NA	1	5	40	185	53	50	38	3191	833	144	19	315	30	35	NA	76	246	237	0	23	72	407	58	80	52	181	100	27	12	47	30	44	292	44	83	248	66	87	413	162	40	165	72	30	109	112	285
ERR688607	0	NA	0	396	0	539	0	0	0	12841	0	75	0	0	0	0	NA	0	89	0	0	0	0	0	0	0	266	125	0	171	155	127	0	0	0	0	0	0	96	0	65	0	120	724	112	0	0	0	248
ERR1018217	107	NA	19	557	93	736	50	99	86	12800	174	369	50	414	38	143	NA	29	95	154	86	58	65	656	68	55	412	289	358	80	114	286	17	55	63	76	555	10	58	103	88	80	107	653	71	343	95	90	187
ERR1018190	50	NA	2	27	12	92	26	20	18	2417	100	34	5	33	18	4	NA	31	213	57	8	6	51	27	26	10	20	89	30	13	2	27	6	105	23	20	10	16	21	19	60	50	34	49	24	2	0	6	725
DRR171694	126	NA	0	0	147	509	0	0	62	14677	183	195	124	185	59	0	NA	205	355	260	0	154	233	2955	154	213	271	537	80	137	70	0	0	85	77	91	131	74	133	130	0	158	69	475	78	65	0	0	71
DRR171634	266	NA	0	110	80	398	0	84	115	14691	794	344	111	595	0	0	NA	62	280	367	0	330	87	4668	0	88	170	481	190	64	58	297	0	0	0	0	429	0	244	214	183	143	150	1198	193	102	0	72	379
DRR171876	0	NA	0	90	0	148	0	0	0	4129	4176	111	0	339	0	0	NA	0	1301	437	0	124	0	749	0	0	0	244	538	0	0	0	0	0	348	0	407	986	60	0	106	95	0	276	0	0	0	0	619
ERR1018256	169	NA	10	41	381	471	37	67	18	5887	302	224	59	119	36	132	NA	88	299	173	1	341	48	1241	68	151	79	359	244	66	13	64	20	51	100	104	90	215	103	75	103	180	52	303	73	13	94	31	238
CCMD52145360ST-11-0	584	NA	0	166	182	912	462	554	149	13745	331	696	237	156	276	365	NA	491	680	580	0	90	352	793	566	691	211	988	224	145	0	149	0	300	384	188	189	323	278	423	210	951	137	1011	424	65	0	89	132
CCIS81139242ST-4-0	153	NA	2	130	81	512	63	16	31	22174	141	328	105	191	23	55	NA	30	95	107	73	33	121	439	50	23	282	300	279	174	89	146	0	64	133	56	81	29	38	121	94	137	77	1055	52	48	0	111	311
ERR1018290	120	NA	22	42	19	209	41	86	19	4041	51	109	31	54	33	54	NA	77	82	93	2	22	88	237	56	89	73	152	78	11	12	37	3	63	85	75	90	45	30	67	61	166	30	140	40	29	80	10	48
DRR171687	86	NA	0	176	0	65	0	0	0	3285	581	0	0	364	0	0	NA	276	235	217	0	229	0	0	0	125	0	0	203	0	0	0	0	0	0	0	99	0	0	0	59	111	120	648	128	0	0	96	0
CCIS87116798ST-4-0	165	NA	23	23	26	296	75	76	94	4371	236	210	26	151	72	34	NA	184	176	121	2	74	50	249	90	107	176	274	243	24	49	114	34	83	87	51	185	58	61	100	92	210	34	217	65	55	85	145	109
DRR171722	179	NA	0	117	175	287	0	66	0	7161	1379	130	0	230	0	60	NA	108	243	696	0	194	0	668	0	109	119	524	213	0	0	0	0	150	202	0	85	460	0	170	119	279	200	343	89	0	0	0	214
ERR1018193	51	NA	6	3	43	259	29	14	35	3331	280	106	18	176	25	16	NA	166	39	94	8	165	27	137	10	44	94	96	64	14	113	115	3	24	41	10	200	29	12	75	55	72	32	379	57	63	65	7	318
CCIS59132091ST-4-0	177	NA	50	146	70	1061	45	80	155	35906	291	1640	114	211	66	58	NA	89	157	115	9	120	67	1328	42	64	616	833	657	199	194	463	18	59	116	54	315	37	112	129	370	173	104	1222	134	291	55	193	355
DRR171557	0	NA	0	0	0	63	0	65	0	7619	1256	0	0	1084	0	0	NA	404	0	375	0	787	150	107	0	0	0	230	331	0	0	137	0	0	0	0	357	0	320	58	0	62	376	1600	309	0	0	94	336
CCMD46222674ST-21-0	603	NA	161	26	93	527	170	122	66	10847	172	268	74	218	105	100	NA	180	254	473	3	144	198	3145	178	273	225	464	395	126	51	184	44	179	162	121	225	117	122	190	236	389	93	689	205	159	65	55	118
DRR127524	357	0	10	176	166	326	97	147	512	6643	2628	250	35	394	82	77	0	135	872	665	17	120	232	1182	179	205	224	826	384	213	46	70	43	271	544	88	234	125	137	251	251	287	93	398	161	38	118	10	526
CCMD29706695ST-11-0	401	NA	0	0	64	463	231	265	108	9159	342	367	70	170	158	166	NA	270	298	360	0	113	169	3612	159	219	72	731	222	108	0	93	0	123	276	160	97	185	159	270	157	567	74	396	166	0	0	0	190
DRR127567	3	0	8	325	1	49	4	8	0	1533	54	53	6	51	1	7	0	11	19	3	0	26	10	73	3	4	61	15	87	1	16	26	1	26	0	6	34	7	7	15	26	27	10	59	9	0	0	12	23
DRR171725	167	NA	0	0	420	337	0	114	74	6468	622	314	377	310	0	63	NA	0	387	306	0	93	443	951	76	81	131	527	222	173	93	0	0	135	72	80	307	68	121	302	104	307	71	400	342	74	0	0	172
DRR171669	136	NA	0	784	0	603	0	253	0	10465	1301	224	0	206	142	0	NA	0	540	273	0	110	156	315	76	0	89	329	371	0	0	99	0	0	0	0	598	140	205	80	320	120	207	562	157	0	0	0	248
CCIS94603952ST-4-0	243	NA	53	35	28	533	77	149	68	37384	200	496	122	76	101	74	NA	113	301	190	5	41	113	1592	69	153	135	343	141	162	27	72	8	121	200	81	44	93	77	137	208	262	61	661	118	40	54	136	171
CCIS41288781ST-4-0	119	NA	3	182	46	441	39	70	38	15980	33	331	42	40	29	37	NA	70	162	110	11	92	51	184	52	65	85	358	26	21	34	17	5	49	55	29	31	84	85	83	51	116	40	391	52	27	78	17	83
CCMD39882286ST-11-0	364	NA	137	0	69	591	94	150	0	8023	389	599	0	143	59	0	NA	157	447	169	0	88	162	770	83	141	120	503	446	97	77	253	0	99	126	76	209	85	75	394	497	307	93	626	163	175	0	204	401
DRR171822	448	NA	0	181	0	468	0	0	0	15191	762	59	0	617	0	68	NA	0	450	0	0	482	345	342	0	0	259	488	173	129	0	90	0	90	63	177	264	0	160	69	0	307	66	255	307	0	0	0	573
DRR171692	0	NA	0	0	0	523	0	169	0	4699	1227	71	0	227	308	0	NA	0	746	746	0	0	0	1361	0	0	63	172	647	0	0	0	0	0	0	0	0	0	171	0	721	87	0	213	0	0	0	0	173
DRR127724	71	0	2	89	20	216	34	42	45	8190	28	103	28	44	35	33	0	9	88	98	4	88	42	59	22	73	107	343	24	78	43	57	27	27	50	34	136	31	77	91	9	72	13	384	38	50	0	18	126
DRR127752	39	0	3	175	43	539	0	12	21	6703	115	353	18	131	29	33	0	21	66	16	48	75	28	131	0	29	73	66	183	3	564	29	0	14	10	14	44	1	74	39	50	40	10	435	49	203	0	23	210
DRR171749	612	NA	0	243	60	650	193	494	94	20854	223	400	236	263	173	117	NA	346	312	400	7712	189	171	1957	343	500	173	621	275	107	0	200	0	160	217	130	73	202	193	220	227	1092	113	679	257	0	317	221	119
DRR171538	230	NA	0	0	57	240	91	231	0	4478	2269	186	0	127	121	0	NA	171	179	930	0	167	139	539	157	230	90	355	317	61	0	63	0	120	374	112	81	200	95	84	184	261	108	346	69	0	0	0	129
CCIS09568613ST-4-0	544	NA	41	39	50	660	84	178	80	8172	300	331	90	328	163	89	NA	201	251	275	20	185	133	1602	80	204	201	646	372	193	114	152	9	148	142	96	316	150	159	227	119	402	108	605	150	208	212	112	258
CCMD11006829ST-21-0	193	NA	6	82	23	617	47	121	42	13101	342	201	98	186	77	98	NA	121	358	296	0	108	66	213	72	144	177	391	212	53	33	69	16	88	65	57	199	96	52	195	187	181	93	448	66	25	97	126	159
ERR1018248	259	NA	213	119	49	530	119	247	49	16163	387	423	62	355	69	91	NA	196	227	186	26	286	97	645	130	458	289	438	327	86	764	217	31	120	154	118	914	101	117	81	143	367	81	266	114	534	74	376	968
DRR171943	0	NA	0	73	0	375	0	0	0	12419	1005	94	0	539	0	0	NA	76	83	0	0	327	0	113	585	0	117	198	88	0	0	0	0	308	0	0	0	0	159	68	219	0	413	208	107	0	0	0	489
DRR171503	0	NA	0	231	0	287	0	145	0	6424	212	92	0	200	0	82	NA	0	106	0	0	62	178	0	0	128	161	338	144	367	183	0	0	0	0	0	202	0	96	80	188	159	0	503	303	0	0	282	59
DRR171588	310	NA	0	0	0	358	85	174	0	4051	1908	138	83	193	0	111	NA	250	622	658	0	141	132	372	164	337	162	751	345	0	0	0	0	139	430	95	0	134	117	270	276	357	103	238	105	0	0	71	157
ERR688567	283	NA	70	0	0	286	79	173	94	4043	72	257	0	159	0	0	NA	211	312	200	0	0	100	2363	101	144	70	399	203	59	58	0	0	81	78	71	66	75	72	105	128	271	0	256	163	0	0	160	107
DRR171745	0	NA	0	1049	0	445	0	0	0	6915	0	0	0	74	0	0	NA	0	0	0	0	0	76	213	0	0	90	141	132	84	0	0	0	0	0	0	0	0	0	0	0	0	0	264	102	0	0	0	0
DRR171674	115	NA	92	0	0	116	0	0	0	5573	0	0	0	0	81	0	NA	0	287	0	0	0	0	526	0	0	0	163	75	0	0	0	0	0	0	0	0	0	0	0	0	180	0	176	0	0	0	0	0
DRR127755	167	0	0	13	44	494	32	43	23	12047	659	261	101	271	29	23	0	47	61	25	16	225	181	223	30	88	162	451	251	34	36	187	19	52	61	39	404	13	267	89	23	145	36	652	151	24	85	93	260
DRR171949	0	NA	0	120	0	219	0	0	75	7706	126	0	0	153	0	0	NA	0	64	0	0	0	0	153	0	114	159	180	138	0	0	0	0	0	0	0	64	0	90	73	0	77	0	146	0	0	0	0	116
DRR171955	629	NA	0	0	178	428	256	227	248	10124	568	441	0	219	140	136	NA	294	432	756	0	189	307	954	151	409	123	612	939	116	0	151	0	527	164	168	371	301	301	189	355	961	269	466	314	0	0	107	113
CCIS21126322ST-4-0	215	NA	154	58	80	869	67	68	53	17569	285	430	81	290	129	68	NA	110	542	96	74	127	61	511	95	177	260	398	473	89	27	271	23	116	189	84	430	88	107	142	382	193	57	1034	302	283	60	155	226
CCMD26625622ST-11-0	160	NA	0	89	0	348	103	178	0	6015	217	130	63	77	78	0	NA	165	227	120	0	209	105	370	164	97	203	410	132	0	0	173	0	75	87	0	261	74	91	76	102	233	0	455	107	0	0	0	82
CCIS23164343ST-4-0	254	NA	169	18	54	1098	114	164	61	12629	444	707	60	99	78	219	NA	113	366	187	19	152	97	2939	73	117	149	500	244	135	75	178	39	80	143	173	157	67	112	93	272	285	131	863	143	52	48	62	122
DRR171954	234	NA	0	0	0	466	117	283	64	17841	407	342	64	350	92	108	NA	153	296	314	0	453	83	701	97	237	155	511	199	57	0	0	0	175	136	119	212	123	81	158	205	511	341	401	142	0	0	214	144
ERR1018300	42	NA	0	23	12	90	18	10	11	4425	95	56	49	154	26	15	NA	108	62	30	0	51	20	138	4	43	23	111	58	13	2	33	1	9	12	27	32	21	28	34	26	26	12	140	22	5	0	11	14
DRR171960	850	NA	0	0	466	580	202	314	211	10599	732	469	97	173	200	168	NA	214	517	762	0	163	196	805	373	443	291	805	408	109	0	205	0	542	162	156	153	285	278	251	335	805	215	570	265	0	339	288	105
DRR171459	0	NA	0	0	0	99	0	0	0	10569	0	57	0	0	0	0	NA	0	0	0	0	0	0	128	0	0	0	95	0	0	0	0	0	0	0	0	0	0	0	0	0	0	0	121	0	0	0	0	0
CCIS11362406ST-4-0	285	NA	19	75	66	739	147	139	244	12646	219	695	58	383	130	102	NA	257	485	361	13	172	127	5749	100	192	183	622	298	126	93	168	25	152	259	103	354	105	122	133	278	294	183	690	185	75	54	70	390
DRR171845	194	NA	0	289	64	442	0	154	0	4675	1685	170	0	315	94	0	NA	74	255	408	0	94	178	830	0	290	58	1198	358	202	0	99	0	177	67	0	427	92	0	0	633	115	0	379	171	0	0	0	81
ERR688535	119	NA	0	336	0	412	0	0	0	18088	101	448	75	187	0	0	NA	69	221	0	0	116	0	1143	128	0	176	461	187	97	139	117	0	68	0	142	123	0	98	185	188	167	102	835	230	75	0	165	230
DRR171698	615	NA	0	0	147	741	0	216	0	10336	1937	237	0	193	0	291	NA	82	220	498	0	94	117	600	62	105	147	648	682	0	0	66	0	254	0	0	0	134	237	285	495	125	59	551	81	0	0	176	0
ERR688517	673	NA	75	0	0	639	217	531	80	3726	244	561	1720	194	128	241	NA	430	456	509	0	92	254	1241	286	492	185	994	447	60	69	147	0	168	199	137	203	165	177	143	140	568	89	452	306	0	0	186	105
CCMD30626189ST-11-0	227	NA	0	0	649	441	0	231	0	5195	406	346	0	313	116	97	NA	71	1138	664	0	84	130	3456	92	179	332	322	536	78	0	91	0	117	119	105	353	301	192	178	724	172	90	551	111	171	0	0	477
DRR171644	0	NA	0	171	0	153	0	0	74	12954	0	0	0	190	0	98	NA	0	155	0	0	0	226	3765	137	102	80	131	142	0	0	0	0	0	0	105	0	0	177	109	0	109	0	144	0	0	0	86	0
DRR171785	604	NA	0	0	57	745	244	428	0	6664	336	287	113	206	95	149	NA	239	326	229	0	132	140	609	296	248	211	1517	203	93	0	275	0	175	359	219	246	219	226	194	116	835	110	433	174	104	0	279	231
DRR127478	27	0	3	17	10	334	18	29	113	10798	156	219	51	184	10	42	0	7	42	7	269	11	33	47	17	34	152	241	191	49	101	42	5	23	25	20	200	18	35	40	30	39	8	310	28	162	0	96	67
DRR171666	153	NA	0	124	148	552	0	122	73	7285	296	123	0	110	154	105	NA	137	167	178	148	121	69	441	107	83	90	321	210	86	0	0	0	86	184	69	93	80	108	117	124	245	0	815	75	0	0	0	88
ERR688581	233	NA	0	155	0	429	84	351	87	7931	229	453	0	0	0	73	NA	248	354	275	0	76	171	270	168	230	140	565	94	82	0	0	0	217	111	91	128	122	245	227	93	617	89	363	108	0	0	223	203
DRR171814	0	NA	0	0	0	160	0	0	0	5064	178	102	0	80	0	0	NA	74	93	0	0	105	0	107	0	0	86	188	0	0	0	0	0	0	0	0	0	0	0	0	0	115	0	132	0	0	0	0	208
ERR1018226	170	NA	37	145	41	428	60	287	74	10788	264	316	34	181	59	33	NA	178	177	181	6	77	265	1185	62	193	64	221	616	38	80	138	147	46	158	112	123	78	250	77	194	297	166	418	98	24	37	69	81
ERR1018276	79	NA	29	7	13	151	32	36	17	7228	141	91	37	111	19	23	NA	69	73	109	3	87	41	152	24	86	35	166	91	67	25	52	12	62	74	23	54	43	25	39	72	116	24	269	46	13	27	83	105
DRR171595	147	NA	0	0	0	146	0	96	82	3080	1196	243	0	322	0	0	NA	113	911	303	0	145	61	803	0	155	67	397	461	65	0	68	0	0	246	187	208	733	57	125	886	163	81	218	0	0	1374	0	328
DRR127619	0	0	0	5	91	116	28	8	1	6082	100	14	5	35	2	3	0	26	87	0	14	67	2	35	0	14	56	77	69	7	8	59	6	0	11	0	33	2	7	4	74	52	27	209	2	0	0	25	240
DRR171887	325	NA	0	0	64	414	96	157	66	10798	298	247	0	0	0	64	NA	139	356	270	0	141	99	352	110	62	185	422	323	91	89	166	0	186	90	73	86	174	170	167	0	376	169	533	67	63	0	95	0
CCMD63399960ST-21-0	218	NA	10	15	137	583	203	142	128	18238	256	527	218	460	127	151	NA	85	415	353	163	68	155	1082	121	226	87	615	191	174	64	57	40	284	89	91	226	62	296	191	240	340	93	570	145	51	252	88	133
CCIS65479369ST-4-0	28	NA	12	3	18	94	20	12	28	2679	70	100	19	66	12	5	NA	13	96	45	0	53	20	423	18	11	20	60	57	14	23	49	0	16	11	5	49	18	6	21	32	15	30	115	22	8	0	17	26
CCMD48236717ST-21-0	202	NA	1	120	401	326	41	95	118	5050	2202	221	45	92	42	42	NA	117	589	426	8	108	323	1218	106	130	288	589	572	85	38	229	0	90	150	126	712	564	60	154	451	206	68	462	85	20	120	104	632
ERR1018202	46	NA	1	26	3	96	18	14	16	1379	27	38	7	26	18	12	NA	18	28	25	2	15	33	80	11	14	33	82	43	13	9	10	0	6	9	7	42	15	14	18	11	30	8	40	19	8	13	8	20
ERR688579	448	NA	0	0	0	517	145	270	0	10744	121	251	90	156	121	66	NA	182	284	243	0	119	241	528	112	182	180	379	174	93	0	159	0	111	155	131	84	121	148	200	159	408	62	401	155	0	0	166	94
CCMD23101338ST-21-0	575	NA	12	81	120	1022	125	200	69	22669	186	695	152	397	165	177	NA	305	481	416	36	126	209	1301	272	453	240	797	481	90	41	377	33	138	198	164	390	273	204	292	526	569	123	969	139	94	195	131	205
CCIS77252613ST-4-0	287	NA	5	144	207	476	270	257	98	21306	710	653	50	461	178	236	NA	202	461	545	8	103	218	1242	176	353	519	836	590	117	39	408	16	142	242	154	384	136	167	199	229	347	147	660	107	58	171	124	411
ERR688559	586	NA	0	194	0	1038	162	246	65	8846	249	818	108	243	105	109	NA	155	273	455	0	76	126	2280	135	368	689	541	473	119	66	818	357	170	225	190	182	85	196	327	335	467	117	630	229	128	0	247	175
DRR171683	189	NA	0	0	426	426	0	276	150	5558	861	308	107	257	98	0	NA	112	479	299	0	79	522	1950	200	277	203	441	216	102	0	0	0	218	204	102	532	380	67	64	116	348	126	359	98	0	0	0	252
ERR688544	1437	NA	0	378	0	865	526	507	0	6630	102	409	116	87	178	96	NA	277	1045	587	0	187	401	1337	95	219	101	901	132	0	0	146	0	208	364	525	60	161	114	373	226	1057	118	423	187	0	0	113	196
DRR171679	308	NA	0	0	464	1023	0	90	0	6482	1672	201	0	362	277	0	NA	98	693	636	0	352	241	183	242	153	296	176	504	0	57	0	0	284	96	132	313	376	192	108	308	143	274	213	79	0	0	142	424
DRR171741	183	NA	0	0	0	255	111	246	0	8062	231	583	65	358	0	95	NA	182	226	335	220	138	156	513	137	318	211	443	465	108	0	0	0	91	124	163	118	188	211	177	306	358	69	521	96	0	0	77	89
DRR171844	0	NA	0	0	0	60	0	0	0	1363	2243	0	0	644	0	0	NA	0	0	157	0	473	61	0	0	0	95	347	337	0	0	342	0	0	0	0	781	0	355	0	0	84	167	1004	362	0	0	70	1235
DRR171589	0	NA	0	0	0	163	0	0	0	3309	72	71	0	0	0	0	NA	0	0	0	0	121	0	92	0	0	76	0	0	0	0	65	0	0	0	0	0	0	0	0	0	0	0	119	0	0	0	0	0
DRR171907	124	NA	0	0	0	397	0	66	62	8984	202	220	97	259	0	68	NA	122	354	203	0	143	0	308	0	163	129	289	107	0	63	69	0	0	93	0	122	71	107	179	99	156	0	336	0	0	0	188	0
DRR171689	0	NA	0	0	0	241	70	90	0	4995	216	71	0	165	70	0	NA	0	67	0	0	0	0	559	138	118	76	263	70	0	0	197	0	66	113	0	207	0	141	110	94	231	0	253	100	0	0	0	219
DRR171939	492	NA	0	0	0	376	0	0	0	9962	762	71	0	1068	0	0	NA	0	84	0	0	79	0	633	0	81	81	534	0	0	0	305	0	0	0	0	662	0	302	80	93	96	0	577	432	0	0	0	637
DRR171581	323	NA	0	312	145	195	0	0	0	9198	653	0	0	1147	0	0	NA	73	159	0	0	0	161	951	0	69	187	348	71	0	0	0	0	0	107	0	0	0	112	64	135	194	378	639	85	0	0	0	194
DRR171654	105	NA	0	0	0	191	0	83	0	8678	68	113	0	165	0	0	NA	0	94	0	0	0	0	655	0	0	99	202	71	59	0	172	0	0	76	0	0	0	0	139	190	176	0	370	0	0	0	0	87
DRR171546	803	NA	0	0	0	519	0	0	0	7077	1567	268	0	645	397	0	NA	0	280	0	0	96	109	780	0	0	232	745	89	0	0	183	0	186	451	611	535	323	590	0	0	194	105	604	420	0	0	0	414
DRR171525	0	NA	0	0	0	226	0	76	74	8834	123	0	0	0	0	0	NA	0	65	158	0	112	0	618	0	0	75	186	82	0	0	0	0	0	0	0	69	0	0	0	0	143	0	243	0	0	0	0	0
DRR171684	129	NA	0	0	0	364	0	163	89	7076	87	128	153	187	117	0	NA	68	193	167	0	80	112	626	93	156	146	385	160	0	0	0	0	0	70	95	102	120	107	82	166	293	128	198	194	0	0	65	107
DRR171622	240	NA	0	0	65	535	124	315	75	25737	144	204	70	230	83	123	NA	125	182	284	0	160	101	250	166	289	266	366	178	76	0	146	0	126	135	99	73	125	0	192	79	355	74	584	88	111	0	125	160
DRR127594	412	0	0	28	324	231	38	159	89	11684	714	213	42	122	256	62	0	46	655	586	10	48	94	1275	85	100	169	819	38	54	21	51	15	100	347	327	40	28	80	83	93	266	108	227	107	4	0	105	191
ERR1018284	111	NA	3	192	13	316	50	89	89	3522	195	128	53	50	25	42	NA	112	383	89	1	27	75	592	35	84	153	183	90	37	35	45	11	35	40	53	66	34	77	55	97	199	48	262	47	42	0	23	54
ERR1018196	563	NA	14	74	125	509	154	158	67	2864	655	291	48	394	43	71	NA	196	528	584	475	106	91	418	143	211	142	465	352	95	36	138	82	100	226	153	312	147	92	231	277	340	54	204	112	51	50	38	325
ERR688603	174	NA	0	656	0	710	0	95	0	12026	181	613	122	159	90	127	NA	0	211	153	0	0	0	592	0	0	173	283	191	138	77	84	0	0	131	132	143	96	190	0	238	166	109	916	120	0	0	0	273
ERR688551	375	NA	81	116	0	486	107	493	130	7818	181	250	0	79	75	215	NA	182	174	226	0	0	145	607	0	0	131	685	324	156	0	98	0	63	179	138	232	0	70	222	161	490	233	437	0	69	0	129	86
DRR171563	164	NA	0	0	0	205	0	210	59	6632	0	57	167	96	0	102	NA	0	0	252	0	0	75	1379	100	0	76	262	0	70	0	65	0	114	74	141	0	0	0	0	0	297	125	201	0	0	0	0	0
DRR171909	0	NA	0	0	0	142	0	0	0	5775	896	0	0	191	0	0	NA	0	81	0	0	0	0	114	0	0	65	135	150	0	0	95	0	0	0	0	156	82	115	66	0	109	0	135	0	0	0	0	192
CCIS02379307ST-4-0	9	NA	5	3	6	55	3	16	3	1427	34	32	7	26	13	5	NA	20	55	14	2	12	15	27	9	7	39	41	36	10	10	2	0	11	4	10	51	15	5	6	24	18	5	61	8	2	12	6	32
CCMD82866709ST-21-0	483	NA	87	30	83	393	85	115	101	5701	168	280	85	232	80	95	NA	140	436	189	145	89	112	523	39	174	263	438	254	84	61	205	7	121	148	67	135	60	105	171	199	242	38	376	244	145	108	151	180
DRR171710	751	NA	0	132	304	801	83	346	84	16120	277	184	152	253	298	154	NA	527	404	534	0	90	194	412	207	275	150	650	254	76	67	86	0	176	273	130	116	259	119	209	474	512	90	907	309	91	0	208	135
DRR171597	111	NA	0	102	338	513	0	110	0	9717	829	0	0	607	0	90	NA	65	502	134	0	0	65	489	0	0	297	414	157	71	935	1154	0	90	89	110	142	297	73	60	66	228	0	171	0	0	0	0	263
CCIS15704761ST-4-0	46	NA	4	49	4	121	1	4	4	26989	54	15	5	75	2	2	NA	51	130	10	2	26	16	46	4	82	85	138	170	40	49	72	29	18	47	0	33	18	3	139	89	13	30	309	33	25	0	27	51
DRR171891	0	NA	0	0	0	205	0	0	0	7588	1457	90	0	236	0	0	NA	0	0	199	0	162	93	725	0	0	0	243	373	0	0	116	0	0	235	0	434	566	57	77	124	0	0	410	197	0	0	0	304
ERR688643	0	NA	0	0	0	263	0	0	0	12523	909	79	0	310	61	0	NA	0	973	415	0	78	69	345	0	106	0	344	267	0	0	0	0	98	366	0	195	483	0	0	330	74	0	232	104	0	0	0	343
CCMD27867141ST-11-0	964	NA	0	0	0	788	196	364	144	6259	242	606	97	216	151	88	NA	445	1549	368	0	82	354	777	412	257	188	734	178	162	0	122	0	332	278	194	230	392	139	309	239	619	136	428	225	150	0	0	168
ERR1018253	280	NA	37	54	11	367	104	148	48	10343	172	347	38	111	105	69	NA	140	134	136	35	57	111	4139	70	150	151	442	251	108	63	82	5	124	98	72	87	151	80	111	79	316	102	581	85	9	111	53	127
DRR171728	0	NA	0	0	1140	0	0	69	75	5298	1891	0	0	302	0	0	NA	0	855	475	0	0	229	1118	0	0	0	1011	300	0	0	0	0	0	0	0	217	855	0	0	107	169	78	0	0	0	0	77	547
CCMD98531134ST-11-0	774	NA	0	277	0	492	274	515	105	7361	758	1557	203	237	162	88	NA	364	1000	551	307	67	344	3913	396	392	330	491	466	138	0	92	0	233	279	174	166	308	95	171	1012	795	147	608	125	0	0	96	350
DRR171487	129	NA	0	0	0	191	0	139	159	11566	211	102	92	304	68	0	NA	214	114	555	0	0	219	206	126	129	0	537	0	0	0	0	0	219	0	0	0	0	0	0	144	266	174	355	186	0	0	89	0
DRR171719	0	NA	0	0	135	433	0	101	73	8842	947	80	61	414	0	0	NA	346	360	170	0	158	146	341	0	85	92	510	227	0	0	168	0	76	75	70	457	80	233	197	112	242	94	387	155	0	0	0	476
DRR171592	0	NA	0	0	0	462	0	0	0	17193	727	0	0	330	0	0	NA	120	98	0	0	65	0	109	0	0	68	144	0	0	0	90	0	0	0	0	0	0	199	74	121	76	0	569	0	0	0	0	204
CCMD95431029ST-11-0	1268	NA	0	0	77	315	439	712	102	3755	132	187	93	0	220	110	NA	601	728	795	0	0	502	621	487	702	0	1093	77	177	0	0	0	654	373	243	0	529	201	258	0	1379	125	379	132	0	0	0	0
CCMD76222476ST-11-0	107	NA	0	0	125	220	73	94	0	8014	269	234	270	266	64	373	NA	77	95	204	0	0	102	385	84	0	0	336	314	78	0	71	0	0	0	0	0	0	81	125	140	163	0	125	0	0	0	0	0
CCMD54057834ST-11-0	261	NA	0	0	0	381	0	85	0	4973	158	365	68	130	0	0	NA	117	498	155	0	68	110	292	108	169	121	295	180	85	0	0	0	66	171	0	120	0	59	88	0	341	58	363	101	0	0	0	78
ERR688528	816	NA	74	88	82	753	147	317	146	11558	243	923	63	114	186	175	NA	355	717	411	0	111	294	1118	177	249	130	608	368	158	106	202	380	217	223	137	234	313	180	286	201	617	78	643	225	91	0	67	233
DRR171533	0	NA	0	0	0	0	0	0	0	1338	0	0	0	0	0	0	NA	0	0	0	0	0	0	0	0	0	0	0	0	0	0	0	0	0	0	0	83	0	0	0	0	304	0	73	0	0	0	0	0
CCMD50529145ST-11-0	731	NA	0	0	0	347	334	716	105	6895	92	362	76	0	154	91	NA	387	530	443	0	0	273	1385	366	751	0	724	88	96	0	0	0	429	293	136	0	445	244	216	0	1178	107	395	148	0	0	0	73
DRR171773	0	NA	0	118	0	338	116	66	0	8587	941	156	98	143	0	0	NA	92	0	212	0	99	236	826	87	63	100	318	243	62	0	189	0	0	301	0	267	260	90	73	124	118	115	264	75	0	0	0	256
ERR1018210	64	NA	1	28	9	205	16	38	14	6089	24	56	28	38	28	12	NA	54	515	58	5	41	11	2874	12	59	43	237	117	14	32	85	2	29	17	5	51	46	12	70	54	50	28	216	67	12	9	33	24
DRR171514	121	NA	0	208	0	312	0	120	116	12931	92	190	65	115	0	0	NA	112	150	129	0	69	100	196	0	100	123	312	123	60	0	111	0	64	83	0	95	61	0	114	153	178	62	364	83	0	0	0	0
DRR171477	0	NA	0	358	0	302	0	0	0	14383	0	180	0	207	0	84	NA	0	66	0	0	0	0	1114	0	0	143	231	169	0	0	0	0	0	0	0	0	0	0	0	103	123	71	393	0	80	0	0	200
CCIS63448910ST-4-0	17	NA	3	19	5	1513	4	3	30	55946	55	104	82	35	1	30	NA	4	19	11	0	44	32	65	23	3	67	205	137	106	104	89	0	13	14	1	22	3	85	71	28	33	106	390	12	39	0	97	195
CCMD46947453ST-21-0	489	NA	131	96	64	621	72	251	109	7789	100	505	76	216	151	185	NA	220	710	245	1	99	161	2472	64	157	157	365	238	55	72	149	33	228	164	127	247	179	131	273	291	362	113	603	202	216	158	206	449
DRR171492	0	NA	0	99	0	278	0	85	0	6874	71	148	0	159	0	0	NA	99	95	0	0	74	0	212	0	0	84	226	109	0	0	64	0	0	0	0	0	0	59	95	70	175	0	287	0	0	0	0	0
CCIS71301801ST-4-0	127	NA	12	14	50	768	37	68	22	15932	178	244	59	135	36	45	NA	115	354	112	0	34	92	128	67	156	224	449	347	85	39	193	18	69	50	37	199	79	65	67	194	143	31	337	45	34	22	57	982
DRR171642	262	NA	0	0	0	322	75	264	0	7096	415	237	63	208	88	0	NA	214	1811	270	0	194	646	2756	112	165	207	811	206	0	0	0	0	138	101	67	274	163	159	152	230	386	92	712	68	0	0	138	1298
DRR171766	150	NA	0	113	97	182	0	82	0	8910	265	272	95	157	0	0	NA	0	0	124	0	0	115	862	121	147	76	307	135	70	157	123	0	0	0	0	94	0	194	129	160	64	106	471	0	122	0	0	0
ERR1018220	679	NA	4	117	297	837	138	295	67	12927	502	359	97	319	64	65	NA	409	589	762	19	107	178	309	156	252	120	497	456	76	18	46	94	166	476	94	409	242	99	166	172	500	181	460	532	49	119	96	307
CCIS05314658ST-4-0	355	NA	11	17	53	532	68	101	50	17014	194	268	137	123	59	65	NA	144	149	197	45	97	123	3140	112	144	312	335	146	159	75	134	23	83	114	71	122	97	185	133	129	270	75	452	99	52	116	95	217
DRR127535	32	0	1	7	22	190	18	46	41	4630	579	107	36	222	24	44	0	55	110	348	5	24	55	1008	31	25	58	211	185	69	15	21	35	32	166	23	23	290	62	34	63	83	62	160	56	17	0	22	208
CCIS78100604ST-4-0	192	NA	9	45	80	699	59	49	50	14723	279	391	86	258	97	56	NA	78	283	151	38	39	74	1934	21	138	248	446	290	85	45	130	8	118	123	84	186	35	264	116	214	150	78	796	152	43	111	177	309
DRR127532	98	0	0	256	129	334	33	90	93	11351	553	75	30	92	38	84	0	26	139	70	4	47	115	315	31	126	81	312	371	104	41	69	13	136	83	50	57	49	66	91	35	264	56	416	44	0	156	128	118
DRR171706	134	NA	0	120	0	163	0	0	0	5414	434	65	0	165	64	0	NA	0	0	0	0	68	0	301	0	84	0	194	0	0	0	0	0	0	73	75	85	0	145	59	100	80	85	210	154	0	0	0	150
ERR688573	519	NA	0	0	0	656	167	275	0	7491	97	605	108	175	91	86	NA	162	225	197	0	114	98	1503	182	267	142	559	145	167	86	0	0	151	152	183	84	135	218	159	158	624	229	433	111	0	0	401	142
CCIS55230578ST-4-0	218	NA	36	64	39	484	76	137	57	10684	195	349	66	128	72	101	NA	167	202	154	1	127	71	338	79	139	299	370	260	81	60	33	34	66	96	39	251	62	94	111	108	191	64	349	73	80	102	81	308
DRR171880	143	NA	0	0	59	230	83	163	78	7244	164	178	0	360	0	0	NA	483	129	0	0	168	110	437	130	146	256	224	704	0	0	0	0	92	88	81	0	107	59	71	77	278	88	232	0	0	0	0	118
DRR171569	131	NA	0	0	0	271	0	110	0	7001	122	403	0	218	61	0	NA	82	124	124	0	218	105	1643	0	242	228	303	222	92	0	129	0	69	82	68	98	76	72	125	173	229	0	412	105	0	0	0	70
ERR1018214	59	NA	0	82	68	176	19	8	17	3413	308	41	78	505	16	17	NA	343	89	47	0	265	13	262	12	65	312	131	93	10	1	70	11	18	171	15	128	29	16	27	363	53	36	220	23	17	20	18	55
CCIS46467422ST-4-0	2	NA	0	1	6	23	0	0	0	981	3	25	9	4	2	13	NA	0	16	4	0	8	15	723	2	6	26	10	41	6	2	2	0	1	10	0	11	2	2	4	4	8	0	37	9	0	0	1	17
ERR688523	570	NA	0	295	0	576	231	216	65	9456	91	1137	72	215	79	147	NA	161	527	202	0	148	270	2499	141	223	104	487	270	110	152	76	0	112	265	160	172	88	170	540	401	512	138	725	127	186	0	269	140
ERR1018291	151	NA	22	32	15	291	99	178	36	7445	323	113	52	186	43	57	NA	201	282	177	0	76	97	619	167	148	80	303	210	50	15	97	16	66	90	53	405	126	121	69	49	262	76	263	150	11	38	45	156
DRR162776	14	0	0	63	30	156	0	2	41	3311	101	71	2	127	5	8	0	129	23	41	0	65	10	1060	14	3	98	67	62	47	10	11	0	29	22	12	7	34	34	15	75	7	15	123	32	3	0	4	78
CCIS14449628ST-4-0	197	NA	7	62	30	273	76	145	64	4959	173	132	71	117	53	83	NA	101	152	148	5	57	64	115	45	84	82	225	114	63	17	58	4	77	62	44	59	77	51	72	60	137	28	263	58	20	75	51	81
DRR171536	96	NA	0	4715	59	382	0	0	0	12940	194	136	88	205	0	141	NA	107	104	0	0	107	223	398	77	147	304	309	232	0	96	196	0	173	0	58	94	111	84	106	141	113	88	818	0	0	0	0	101
DRR171890	86	NA	0	0	0	209	0	80	0	12012	312	104	0	211	0	0	NA	108	95	0	0	112	0	292	0	85	166	327	127	74	0	0	0	0	80	0	187	0	0	166	98	174	0	312	78	0	0	0	127
DRR171958	201	NA	0	133	0	435	119	203	66	14661	255	147	66	150	123	0	NA	100	118	156	0	0	63	996	0	145	165	376	266	93	177	256	0	111	66	134	185	86	105	106	133	289	84	452	132	134	0	0	137
DRR171789	268	NA	0	0	0	324	0	102	75	11713	494	202	61	273	0	62	NA	162	103	188	0	137	199	783	97	182	135	336	268	0	0	82	0	78	177	74	105	110	120	164	132	213	167	479	161	0	0	0	350
ERR688511	0	NA	0	321	0	486	0	0	0	15480	102	337	159	0	0	0	NA	0	78	0	0	0	0	361	0	146	256	239	71	174	181	76	0	0	0	85	91	0	170	68	115	135	171	470	66	0	0	0	1512
DRR171551	0	NA	0	0	0	59	0	0	0	1281	74	0	0	0	0	0	NA	0	111	0	0	0	0	0	0	0	300	190	60	0	0	0	0	71	0	0	0	0	0	0	0	70	0	99	0	0	0	0	137
DRR171565	0	NA	0	0	0	168	235	0	0	4128	203	79	0	197	0	0	NA	78	0	0	0	68	0	460	0	94	114	269	0	116	0	116	0	78	0	159	82	86	0	67	0	423	102	319	0	0	0	0	98
DRR171862	367	NA	0	0	0	472	100	141	0	4139	2159	224	65	438	0	169	NA	131	271	356	216	157	77	399	116	139	113	431	454	103	128	87	0	96	227	104	138	555	162	146	81	283	0	424	68	98	0	196	484
MMPU84450604ST	695	NA	27	93	86	934	233	224	75	22441	775	950	159	488	208	195	NA	245	464	261	0	83	306	9494	255	224	285	1012	384	239	44	223	0	166	246	218	406	130	309	516	201	598	260	1118	176	115	186	212	481
DRR171678	439	NA	0	0	0	665	107	232	0	14566	263	176	62	350	335	59	NA	572	208	248	0	137	88	387	128	163	202	431	356	103	0	148	0	200	246	196	214	159	0	197	299	478	66	520	202	0	0	124	1238
DRR171715	138	NA	0	0	0	346	0	0	89	13781	352	232	0	69	0	0	NA	133	88	0	0	115	193	663	0	0	116	237	103	71	61	93	0	0	0	88	209	0	59	168	75	172	102	489	101	191	0	0	182
DRR127485	601	0	3	111	237	768	129	378	154	8360	748	421	119	183	134	69	0	524	340	465	5	62	243	626	174	411	196	708	348	79	45	90	26	186	196	94	89	196	149	361	301	623	77	498	184	88	319	208	107
DRR127756	74	0	9	353	55	619	35	62	243	7063	68	296	104	127	23	38	0	66	102	69	36	53	48	267	40	29	209	213	133	26	41	68	4	73	85	41	118	39	74	119	207	81	63	437	88	119	56	118	83
ERR688570	91	NA	0	0	0	270	0	0	0	9054	308	126	0	226	58	0	NA	0	258	170	0	0	94	521	0	122	93	251	202	0	0	0	0	66	142	0	100	119	0	99	186	116	0	242	95	0	0	105	204
DRR173016	0	NA	0	0	0	151	0	0	0	5024	675	72	0	280	0	0	NA	89	0	0	0	0	98	292	0	110	0	137	70	0	65	0	0	0	0	102	0	0	0	0	0	0	77	124	200	0	0	0	115
ERR1018266	417	NA	53	124	29	851	166	301	49	6725	189	218	25	126	103	154	NA	237	338	306	4	72	175	569	202	300	407	371	231	47	88	128	30	140	216	77	208	141	110	289	190	483	154	555	122	107	148	207	215
ERR1018225	198	NA	12	15	202	312	39	127	38	4865	1065	111	19	179	41	139	NA	136	683	736	2	120	118	551	117	120	120	362	281	89	12	35	55	223	71	62	150	289	41	101	159	170	96	338	110	7	96	102	277
CCIS35100175ST-4-0	132	NA	20	99	229	551	31	101	46	10069	513	272	121	222	106	108	NA	96	251	225	4	43	89	143	76	87	201	327	167	103	45	169	0	66	57	36	307	92	59	46	117	109	84	422	140	60	62	87	121
DRR171606	86	NA	0	0	0	288	0	0	0	9852	1151	111	0	371	0	0	NA	105	170	0	0	112	300	1249	0	98	66	348	141	66	0	226	0	0	0	0	586	294	352	0	482	237	0	436	395	63	0	0	566
ERR688639	280	NA	0	107	0	457	86	177	0	7295	187	963	132	125	88	0	NA	150	208	145	0	74	183	492	72	169	87	431	168	115	0	82	0	93	175	144	129	80	157	187	132	386	113	448	96	167	0	0	156
CCMD85661207ST-11-0	284	NA	0	0	0	400	80	147	87	11711	75	209	79	80	62	60	NA	166	165	175	0	0	172	1392	107	172	167	321	121	64	0	201	0	146	99	74	111	87	118	125	172	455	64	353	153	0	0	83	77
ERR1018213	23	NA	0	724	12	227	21	14	24	5913	101	398	22	55	7	29	NA	28	33	3	149	51	19	1019	19	68	60	101	298	17	54	67	22	24	24	38	173	12	64	22	72	52	32	322	40	41	0	63	1119
CCIS34055159ST-4-0	83	NA	0	26	83	298	46	53	31	8775	68	240	28	122	18	23	NA	44	95	35	0	80	49	185	61	45	30	216	110	46	16	140	2	11	48	24	116	43	36	104	102	104	70	386	60	2	35	14	20
CCIS83870198ST-4-0	861	NA	4	71	38	534	285	291	101	21174	158	316	207	58	74	155	NA	278	828	424	4	171	260	976	173	248	223	821	199	114	1	253	11	214	337	222	42	198	137	354	141	749	79	461	179	13	79	82	71
ERR688548	126	NA	105	210	0	308	0	67	0	13725	167	1180	68	482	0	0	NA	0	107	0	0	183	0	1548	0	63	260	300	103	111	105	118	0	0	0	82	224	0	102	90	101	145	153	561	0	69	0	150	304
ERR710429	386	NA	0	136	66	408	121	198	86	8424	145	592	73	154	63	108	NA	99	418	126	0	63	100	1161	129	215	81	351	250	93	0	140	0	156	76	121	137	85	110	145	152	280	116	388	83	0	0	0	77
CCIS41222843ST-4-0	320	NA	30	129	53	749	95	124	132	16630	371	938	179	192	74	44	NA	214	978	165	9	93	177	311	138	126	329	481	438	91	258	122	10	185	174	91	193	127	85	134	316	387	106	791	143	96	53	185	255
CCMD45988061ST-21-0	246	NA	3	8	14	315	80	147	30	5066	119	272	30	100	59	32	NA	119	294	153	0	32	139	888	78	143	56	362	79	45	12	28	4	73	123	68	75	74	87	135	84	222	71	193	58	12	49	19	50
DRR171677	365	NA	0	161	156	390	82	185	137	7863	893	178	85	73	218	192	NA	110	333	441	0	0	349	562	0	120	198	490	271	64	0	0	0	131	281	339	110	210	73	150	140	239	163	290	169	0	0	0	134
DRR171784	199	NA	0	0	85	494	0	90	72	17513	272	391	107	144	62	96	NA	221	140	160	0	115	162	1105	0	271	218	335	443	62	57	168	0	110	94	0	75	66	0	138	465	134	104	565	89	0	0	122	79
ERR1018227	118	NA	7	15	43	759	39	170	113	15468	340	199	37	232	42	23	NA	188	261	115	11	72	123	653	102	202	160	378	368	85	35	620	28	74	81	73	371	119	133	125	173	291	150	498	425	28	0	29	437
DRR171797	0	NA	0	0	83	121	0	81	80	4659	302	247	0	65	0	0	NA	150	210	182	0	149	154	640	0	101	153	450	0	0	0	0	0	147	0	0	317	0	0	107	114	196	166	421	254	0	0	0	502
DRR171517	0	NA	0	0	0	75	0	122	0	3621	484	74	0	0	171	0	NA	0	343	593	0	0	100	271	0	0	100	193	347	135	0	0	0	93	0	0	463	0	84	0	319	66	64	137	0	0	0	0	121
CCIS81887263ST-4-0	333	NA	61	147	103	806	123	152	75	15924	378	644	116	309	123	156	NA	209	368	180	157	161	126	304	85	127	511	795	672	190	209	219	28	141	181	69	249	92	151	246	346	367	69	785	212	175	98	177	335
DRR171559	671	NA	81	0	0	565	200	446	130	8830	143	431	66	166	107	234	NA	305	919	415	0	59	292	614	333	342	148	692	178	101	0	83	0	248	294	198	142	239	139	151	137	649	127	466	76	0	0	68	112
ERR1018244	206	NA	1	127	42	332	154	119	51	9250	292	381	55	190	116	74	NA	120	129	165	2	49	435	1023	156	106	73	525	190	31	35	102	51	138	117	126	342	101	107	165	35	287	95	403	142	11	64	71	263
CCMD38158721ST-11-0	134	NA	0	0	0	313	0	134	0	3879	0	105	0	0	0	68	NA	85	117	0	0	0	0	173	0	91	112	185	121	0	0	0	0	0	93	0	0	0	108	91	120	225	0	302	0	0	0	0	0
CCMD79987997ST-21-0	190	NA	0	46	8	263	15	87	40	7315	106	100	180	40	47	78	NA	136	243	136	17	31	99	203	39	130	125	299	194	101	11	52	87	96	139	21	68	44	63	148	14	154	25	282	89	5	42	14	244
ERR688518	330	NA	0	122	0	645	0	98	0	10006	0	256	229	195	0	0	NA	139	162	118	0	0	0	585	0	147	114	533	197	209	77	0	0	0	67	103	98	0	127	67	110	300	0	676	90	0	0	107	168
ERR688647	205	NA	0	0	0	395	91	124	0	11113	105	390	81	174	93	77	NA	99	235	112	0	100	116	3358	0	109	170	381	99	137	0	0	0	0	157	139	102	103	0	167	168	248	125	429	119	0	0	222	142
DRR127669	82	0	1	254	24	242	71	96	64	6550	64	152	91	48	66	54	0	21	89	138	0	27	69	355	43	81	65	225	68	26	16	59	0	17	75	15	27	66	27	44	60	125	40	190	89	6	0	21	30
DRR171848	164	NA	0	0	99	282	0	106	58	13775	793	331	0	309	0	0	NA	98	142	162	0	69	0	283	0	106	256	650	90	83	0	186	0	181	69	0	135	99	247	280	190	171	65	374	165	0	0	0	354
CCIS88007743ST-4-0	91	NA	7	52	11	321	35	43	23	6378	104	332	41	25	36	64	NA	33	325	62	0	22	32	2875	18	29	141	238	99	71	32	45	5	21	46	34	39	59	52	33	69	96	37	304	44	10	76	41	247
DRR171758	0	NA	0	0	0	636	0	0	0	3373	875	129	0	1184	0	0	NA	0	115	0	0	276	95	852	0	0	167	435	62	0	0	283	0	0	0	0	637	0	307	73	410	62	0	330	532	0	0	0	567
DRR171846	0	NA	0	0	518	91	0	0	0	2283	1288	96	0	169	0	0	NA	0	428	262	0	503	0	673	0	0	0	105	349	0	0	0	0	0	0	0	79	506	0	267	59	66	0	69	0	0	0	75	324
CCMD27463710ST-11-0	1653	NA	0	395	129	1000	794	436	489	10376	567	1584	150	482	385	421	NA	1064	1110	905	0	201	281	1446	602	938	185	1557	433	289	337	115	0	532	664	316	309	568	385	525	554	1276	248	919	244	299	0	74	222
DRR127776	105	0	10	68	4	517	16	8	13	11680	80	153	95	46	15	217	0	59	40	52	13	65	22	511	5	55	371	285	223	290	117	50	27	38	96	45	187	3	62	135	27	95	45	767	37	71	41	57	383
DRR171599	0	NA	0	230	65	178	0	0	0	5992	814	168	64	358	0	0	NA	341	120	540	0	799	0	1269	90	0	0	189	308	0	0	66	0	0	0	0	108	0	71	157	133	102	255	967	325	0	0	103	97
ERR710426	0	NA	0	191	263	1136	0	0	0	43187	82	378	82	77	0	0	NA	0	91	0	0	177	92	2662	0	140	326	380	586	119	85	134	0	0	0	0	159	0	121	0	82	209	232	472	0	0	0	68	1270
DRR171513	0	NA	0	0	0	403	0	0	80	9476	254	136	0	289	0	0	NA	0	203	0	0	0	0	177	0	0	73	197	171	85	0	0	0	0	79	0	164	0	110	100	78	185	0	408	89	0	0	0	223
ERR1018250	185	NA	2	223	10	306	21	16	16	8215	107	200	24	72	8	201	NA	43	68	68	0	28	98	1116	70	109	206	195	177	89	7	68	98	30	45	121	86	8	58	66	69	248	82	309	113	40	29	14	63
CCIS90164298ST-4-0	356	NA	56	49	85	813	132	150	90	9837	314	467	45	143	102	102	NA	183	513	423	16	74	182	2994	132	179	305	515	229	114	132	273	45	121	123	98	113	151	140	233	292	390	128	361	239	88	115	75	156
DRR171648	165	NA	0	200	115	421	263	183	0	20411	0	408	110	165	169	130	NA	0	165	281	0	100	187	741	97	193	89	426	111	0	122	260	0	101	303	0	114	128	110	181	107	353	60	651	0	0	0	231	0
DRR171650	0	NA	0	427	0	267	0	71	110	8383	293	60	99	199	64	131	NA	61	65	133	0	0	0	136	0	0	167	332	118	119	0	91	0	87	70	70	84	0	173	92	0	201	87	393	173	0	0	0	203
ERR688563	0	NA	0	0	0	216	0	78	0	3028	0	468	0	0	0	0	NA	70	0	0	0	0	0	257	0	0	106	162	72	0	0	0	0	0	0	154	59	0	66	0	92	89	0	160	121	0	0	0	0
ERR1018198	175	NA	7	771	24	1902	45	166	62	11224	201	135	17	303	34	98	NA	69	130	112	4	61	42	333	27	69	75	375	291	83	21	44	20	26	64	90	119	52	33	128	43	269	113	381	129	138	31	28	259
DRR171543	0	NA	0	0	0	328	0	0	0	4145	849	107	0	97	239	0	NA	69	399	209	0	0	0	405	0	0	0	188	175	0	0	0	0	0	154	0	0	309	118	70	91	72	0	79	0	0	0	0	60
DRR171768	595	NA	0	219	0	596	205	616	150	7127	98	333	128	187	138	170	NA	349	473	546	0	64	247	501	426	450	166	733	321	143	0	0	0	466	230	144	169	335	147	204	166	840	95	500	133	0	0	0	120
ERR1018201	33	NA	2	57	11	125	41	45	19	3563	72	42	15	31	19	10	NA	32	180	44	16	15	41	39	13	37	30	92	56	20	7	28	2	45	23	25	15	15	23	19	72	58	27	90	18	10	0	13	1158
CCMD71242853ST-11-0	178	NA	0	0	0	314	0	78	0	4938	85	90	0	70	0	0	NA	89	158	0	0	113	0	571	99	149	298	305	176	93	0	0	0	0	109	0	0	102	77	65	0	245	0	287	72	0	0	0	64
ERR688520	429	NA	0	0	0	772	122	258	170	7438	88	431	0	104	100	80	NA	225	419	228	0	100	137	3062	116	270	166	532	143	190	0	0	0	89	223	216	0	66	171	223	343	602	83	612	82	0	0	0	80
ERR710430	0	NA	0	335	0	391	0	0	0	10119	171	246	92	62	0	92	NA	0	0	0	0	0	0	813	0	0	254	179	152	213	115	0	0	70	0	0	0	0	127	59	0	105	90	590	0	0	0	202	256
DRR171643	0	NA	0	228	0	388	0	0	84	17324	173	211	0	354	0	69	NA	93	0	0	0	157	0	338	0	0	129	232	219	0	66	83	0	0	126	0	85	0	0	94	0	0	0	412	0	110	0	79	0
DRR171731	142	NA	0	230	0	355	0	140	77	20651	230	170	0	166	0	0	NA	77	131	137	0	120	147	1056	0	105	73	275	317	79	0	65	0	0	0	85	208	0	0	108	188	265	128	436	71	0	0	0	179
ERR688557	0	NA	0	0	0	225	0	0	0	5706	0	0	70	73	0	0	NA	0	0	0	0	0	0	3527	0	0	110	75	0	81	100	0	0	0	143	0	67	0	0	0	68	99	0	293	0	0	0	0	521
DRR171661	321	NA	0	0	189	493	178	245	222	7251	197	277	62	258	87	100	NA	195	182	233	0	0	138	449	174	165	117	446	179	92	0	146	0	290	237	86	309	161	152	139	89	546	77	386	262	0	349	0	0
ERR1018270	137	NA	14	76	48	328	69	188	55	11219	445	157	80	639	66	77	NA	49	112	90	52	66	135	310	58	100	66	314	244	59	83	221	19	68	64	95	364	79	56	155	55	224	58	508	132	56	69	107	416
DRR171915	658	NA	0	0	0	955	211	334	0	9817	303	260	121	187	91	91	NA	381	497	328	0	118	231	1840	140	282	279	1422	200	120	77	105	0	204	124	90	104	191	220	265	155	788	93	522	159	90	0	248	188
MMPU29365221ST	179	NA	9	132	60	1029	1414	151	108	13424	2443	190	46	81	61	64	NA	152	270	383	0	151	144	2387	104	893	119	390	165	100	14	60	60	150	133	105	265	39	160	448	63	322	194	518	95	8	1149	67	386
DRR171598	302	NA	0	0	0	551	0	174	0	6193	117	188	103	100	0	222	NA	129	162	252	0	0	56	193	72	144	202	642	185	0	0	0	0	106	144	70	0	112	61	125	88	243	0	238	70	0	0	0	127
DRR171630	0	NA	0	161	269	192	104	0	183	9221	579	132	0	193	296	251	NA	79	218	228	0	96	406	912	0	359	372	811	221	294	90	241	0	434	0	0	92	101	73	101	84	990	407	440	224	0	0	150	130
DRR171555	0	NA	0	0	61	279	69	0	0	7387	140	0	0	88	0	0	NA	77	128	131	0	0	148	416	71	92	131	279	76	0	0	0	0	80	74	0	170	93	141	166	115	239	0	225	0	0	0	123	131
DRR171867	367	NA	0	0	80	487	123	280	180	13879	127	182	94	135	94	67	NA	169	224	260	0	188	177	335	173	171	258	644	169	111	0	69	0	105	162	148	127	153	57	192	162	419	70	401	0	0	0	0	273
DRR171696	107	NA	0	190	0	358	0	72	0	17267	431	0	85	376	0	0	NA	0	144	303	0	0	238	94	65	0	95	339	66	85	0	0	0	63	0	69	155	0	0	168	220	275	71	572	103	0	0	0	173
ERR688610	679	NA	0	147	115	732	375	520	0	6386	376	474	97	175	268	202	NA	523	643	751	0	161	208	1369	217	425	283	1112	382	92	81	175	151	240	300	156	161	233	113	198	173	657	135	587	140	156	0	122	64
DRR171675	372	NA	0	0	89	740	139	236	160	7776	896	416	61	135	0	115	NA	201	325	357	0	115	160	951	71	185	128	428	299	83	0	90	0	131	183	69	129	146	135	313	388	515	128	358	106	72	0	0	100
DRR171961	313	NA	0	0	0	485	0	133	0	8448	1024	101	0	318	0	61	NA	225	300	170	0	94	123	709	87	199	271	370	208	57	0	95	0	60	0	0	188	133	131	172	124	290	108	601	120	205	0	79	708
DRR171853	0	NA	0	0	0	153	0	0	0	3272	809	0	0	583	0	0	NA	0	130	0	0	106	0	126	0	106	114	376	0	0	0	136	0	0	0	0	244	0	235	108	326	0	0	463	254	0	0	0	342
ERR1018279	2	NA	6	152	2	76	2	0	6	1064	6	25	1	8	1	0	NA	1	19	0	4	1	1	30	0	0	26	3	112	27	30	43	0	2	0	2	22	3	0	4	0	4	9	92	5	4	0	11	23
CCIS50148151ST-4-0	196	NA	0	0	68	404	110	88	27	22597	158	234	37	88	56	56	NA	109	158	275	96	74	69	138	38	79	103	252	66	73	28	55	8	67	54	28	68	28	105	108	113	178	59	429	61	6	98	40	60
DRR171624	0	NA	0	245	0	185	0	0	0	8532	83	0	0	0	0	0	NA	0	0	0	0	140	0	0	0	0	0	97	86	0	0	0	0	0	0	0	0	0	0	0	0	0	0	151	0	0	0	0	0
ERR1018296	18	NA	2	4	55	80	12	17	10	3820	119	38	10	30	17	12	NA	11	103	78	0	10	7	113	14	29	16	36	83	9	6	19	6	11	50	4	36	49	11	9	42	15	11	66	9	11	41	11	84
CCMD28738636ST-11-0	0	NA	0	0	0	171	0	0	0	5677	0	63	0	0	0	0	NA	0	0	0	0	0	0	348	0	0	0	92	0	0	0	0	0	0	0	0	0	0	0	0	0	136	0	196	0	0	0	100	141
DRR127731	83	0	1	8	187	161	28	51	127	14513	293	108	23	167	115	20	0	181	102	138	33	186	119	1755	5	255	52	253	125	58	10	53	19	67	50	82	73	117	98	187	15	148	44	201	62	1	0	49	103
DRR171668	0	NA	0	104	0	324	0	94	69	14156	312	154	0	313	0	66	NA	67	0	0	0	169	0	415	0	113	169	211	664	63	0	124	0	0	0	74	239	0	0	74	0	193	79	222	233	119	0	0	2528
DRR171850	178	NA	0	0	0	131	0	105	75	6423	108	61	111	171	68	0	NA	80	183	146	0	0	0	279	0	147	258	322	100	0	0	0	0	74	84	0	84	150	0	124	439	215	0	239	0	0	0	0	78
CCMD15562448ST-11-0	683	NA	0	153	60	337	242	373	0	4417	229	271	133	129	140	0	NA	167	271	320	0	88	146	532	154	327	77	454	112	77	0	126	0	193	173	178	164	211	215	311	158	464	76	338	0	0	0	0	74
[truncated: 816 more columns]

## Sheet: example_train_metadata
	Group	Gender	Age	BMI	Cohort
CCMD21593359ST-11-0	CRC	F	85	19.7	GER
ERR1018192	CRC	F	73	17.7	CHI
DRR171561	CRC	M	62	21.0938	JAP
CCIS40244499ST-3-0	CRC	F	87	32.42	FRA
CCMD72895164ST-21-0	CRC	M	34	27	GER
DRR171460	CRC	M	58	24.0238	JAP
ERR688525	CRC	M	82	30.4705	AUS
ERR688569	CRC	F	73	29.7521	AUS
ERR688574	CRC	M	73	24.8163	AUS
DRR171665	CRC	F	48	29.5159	JAP
DRR171663	CTR	F	55	21.0828	JAP
DRR127685	CRC	M	70	24.2424	JAP
CCMD67373733ST-11-0	CTR	M	73	24.5	GER
DRR171716	CTR	F	55	19.7777	JAP
ERR688534	CRC	F	86	20.5049	AUS
DRR127625	CRC	M	64	23.1084	JAP
ERR1018307	CRC	M	67	24.9	CHI
DRR171945	CRC	F	57	24.4561	JAP
DRR127721	CTR	M	51	28.3848	JAP
DRR171779	CTR	F	62	19.9219	JAP
CCMD64503764ST-21-0	CRC	M	66	31	GER
DRR171690	CRC	F	77	20.2694	JAP
DRR171735	CRC	M	66	24.6755	JAP
ERR688595	CTR	M	63	34.14	AUS
DRR171858	CRC	M	77	23.3377	JAP
ERR1018191	CRC	M	60	23.2	CHI
ERR688521	CRC	M	67	29.4029	AUS
ERR688571	CRC	M	63	25.8806	AUS
DRR171856	CTR	M	60	20.8086	JAP
CCMD35633353ST-11-0	CRC	M	61	25.2	GER
DRR171739	CRC	M	73	22.0581	JAP
CCMD79349503ST-11-0	CRC	F	60	21.9	GER
CCIS87167916ST-4-0	CRC	M	79	30	FRA
DRR171817	CTR	M	54	23.7118	JAP
CCIS41548810ST-4-0	CRC	M	78	19	FRA
DRR171906	CRC	M	73	23.3067	JAP
CCIS12656533ST-4-0	CRC	M	51	30	FRA
ERR688644	CRC	M	65	29.7406	AUS
DRR171734	CRC	F	68	21.7865	JAP
DRR171670	CRC	M	69	25.6801	JAP
ERR688532	CTR	M	72	29.03	AUS
ERR1018211	CRC	M	67	23.1	CHI
CCMD90311071ST-21-0	CRC	F	43	22	GER
ERR1018206	CRC	F	64	29.1	CHI
CCIS29688262ST-20-0	CTR	M	50	25	FRA
DRR171605	CTR	F	46	20.3125	JAP
DRR127628	CTR	M	76	21.7993	JAP
DRR171691	CTR	M	70	22.68	JAP
DRR171802	CTR	M	74	20.6193	JAP
CCIS07648107ST-4-0	CTR	F	62	21	FRA
DRR171821	CTR	M	55	26.8122	JAP
DRR171724	CTR	M	68	21.3839	JAP
CCMD92404903ST-11-0	CRC	F	66	13.3	GER
DRR171750	CRC	M	73	23.3355	JAP
CCMD95433940ST-21-0	CRC	F	49	30	GER
DRR171941	CTR	M	76	23.8281	JAP
ERR688614	CTR	M	70	23.67	AUS
CCIS82507866ST-3-0	CTR	M	57	24	FRA
CCIS27304052ST-3-0	CTR	F	52	20	FRA
DRR171805	CRC	M	63	24.8591	JAP
DRR171515	CTR	M	37	25.0135	JAP
DRR127708	CRC	M	62	25.5937	JAP
CCMD76409700ST-11-0	CTR	F	60	23	GER
ERR688646	CTR	M	46	23.15	AUS
ERR688606	CTR	F	68	22.4	AUS
DRR171621	CTR	M	75	20.1348	JAP
CCMD99440714ST-11-0	CTR	M	39	24.9	GER
DRR171965	CTR	M	70	29.7608	JAP
ERR688550	CTR	M	64	29.3	AUS
ERR688651	CRC	F	77	23.4952	AUS
DRR171776	CRC	M	57	25.4327	JAP
DRR171549	CRC	M	63	23.5078	JAP
DRR171855	CTR	M	63	20.898	JAP
DRR171733	CTR	F	75	18.3655	JAP
ERR688637	CRC	M	79	26.2976	AUS
ERR1018278	CTR	M	58	24.5	CHI
DRR171874	CRC	M	69	22.8395	JAP
DRR171483	CRC	M	61	22.3954	JAP
CCMD31134579ST-11-0	CTR	M	75	21.5	GER
ERR1018309	CTR	M	62	21.5	CHI
DRR171948	CTR	M	74	19.3337	JAP
ERR688533	CTR	M	71	29.04	AUS
DRR171529	CRC	M	65	20.0155	JAP
DRR171497	CTR	M	74	22.5896	JAP
DRR171653	CTR	M	40	22.7732	JAP
CCMD26925580ST-21-0	CRC	M	42	27	GER
DRR127638	CRC	F	32	22.3478	JAP
CCIS21278152ST-4-0	CRC	M	63	25	FRA
DRR171746	CRC	F	63	36.523	JAP
DRR127491	CRC	F	62	21.0828	JAP
DRR171864	CTR	F	54	19.6283	JAP
ERR1018238	CTR	M	55	26.4	CHI
ERR688617	CTR	F	70	22.8	AUS
CCMD59583015ST-11-0	CRC	F	61	24.1	GER
DRR127537	CTR	F	50	20.3428	JAP
CCMD49461418ST-11-0	CRC	M	61	21.6	GER
ERR1018200	CRC	M	77	21.7	CHI
CCIS64785924ST-20-0	CTR	F	59	25	FRA
DRR171574	CRC	M	73	21.2031	JAP
ERR1018283	CRC	M	56	31.3	CHI
ERR688564	CTR	M	70	31.25	AUS
DRR171714	CTR	F	64	21.0938	JAP
CCIS22958137ST-20-0	CRC	M	60	26	FRA
DRR171554	CRC	M	46	25.4028	JAP
DRR171518	CTR	F	46	23.0469	JAP
CCMD13071240ST-21-0	CRC	F	66	23	GER
DRR171673	CTR	M	78	23.3091	JAP
ERR1018288	CRC	F	69	28.3	CHI
DRR171572	CTR	M	72	23.0546	JAP
CCMD74930188ST-21-0	CRC	M	67	30	GER
DRR171567	CTR	F	68	19.2234	JAP
ERR688618	CRC	F	47	25.7812	AUS
ERR1018312	CRC	M	63	22.5	CHI
CCIS10706551ST-3-0	CTR	M	25	24.15	FRA
ERR688515	CRC	M	65	28.0277	AUS
DRR171879	CRC	M	49	37.551	JAP
CCIS93040568ST-20-0	CTR	M	65	30	FRA
DRR171474	CTR	F	68	24.3232	JAP
ERR1018232	CTR	F	62	32.5	CHI
DRR162777	CRC	M	48	23.03	JAP
CCIS98832363ST-4-0	CRC	F	55	25	FRA
ERR1018311	CRC	M	55	25.8	CHI
CCMD72666896ST-11-0	CTR	F	58	23.8	GER
ERR1018302	CRC	F	70	26.7	CHI
ERR1018303	CRC	F	83	18.9	CHI
DRR171607	CTR	F	62	21.9261	JAP
CCIS82944710ST-20-0	CTR	F	38	22	FRA
CCMD86707194ST-21-0	CRC	F	53	31	GER
DRR171861	CRC	M	69	19.3625	JAP
DRR171810	CTR	M	78	21.0938	JAP
CCIS53043478ST-4-0	CRC	M	72	22	FRA
CCMD10191450ST-11-0	CTR	F	62	28.5	GER
DRR171950	CTR	M	65	26.5625	JAP
DRR171620	CTR	F	63	19.1467	JAP
DRR171519	CRC	M	67	24.6755	JAP
ERR1018261	CTR	M	55	22.3	CHI
DRR171966	CRC	F	62	21.875	JAP
DRR127713	CTR	M	49	27.3982	JAP
CCMD18829815ST-11-0	CTR	F	62	27	GER
DRR127521	CRC	M	38	24.3911	JAP
DRR171542	CRC	F	65	20.3125	JAP
CCIS38765456ST-20-0	CRC	F	79	22	FRA
ERR688578	CRC	F	72	26.6728	AUS
DRR171562	CTR	M	55	23.3887	JAP
CCMD59540613ST-11-0	CTR	M	64	25.4	GER
ERR688591	CTR	M	64	29.38	AUS
DRR171767	CRC	F	49	22.6409	JAP
DRR171586	CTR	M	55	24.5089	JAP
DRR171847	CRC	M	47	35.201	JAP
DRR171860	CRC	M	74	25.9516	JAP
ERR1018222	CRC	M	74	26.8	CHI
DRR127583	CTR	F	65	19.8189	JAP
CCMD23541216ST-11-0	CTR	M	61	29.9	GER
DRR171576	CTR	M	40	27.3797	JAP
DRR171813	CTR	F	59	22.2222	JAP
DRR171730	CRC	M	66	22.0581	JAP
ERR1018228	CRC	M	64	24.8	CHI
DRR171748	CRC	F	64	22.4766	JAP
ERR1018231	CRC	M	73	24.5	CHI
ERR688506	CTR	M	68	32	AUS
DRR171763	CTR	M	77	24.6094	JAP
DRR127509	CRC	M	59	25.4581	JAP
CCMD73128545ST-11-0	CTR	F	57	22.2	GER
DRR171711	CTR	M	30	24.15	JAP
DRR171558	CRC	F	66	21.2306	JAP
DRR171771	CTR	F	77	22.8571	JAP
DRR127674	CRC	F	59	20.9566	JAP
ERR1018281	CRC	F	59	27	CHI
CCIS03857607ST-4-0	CTR	M	61	23	FRA
ERR1018295	CRC	M	73	22.1	CHI
ERR688607	CTR	M	72	31.8	AUS
ERR1018217	CTR	M	68	20.4	CHI
ERR1018190	CRC	M	61	25.2	CHI
DRR171694	CTR	F	41	26.079	JAP
DRR171634	CRC	M	64	22.5896	JAP
DRR171876	CTR	M	69	22.1453	JAP
ERR1018256	CTR	M	53	23.4	CHI
CCMD52145360ST-11-0	CRC	M	81	24	GER
CCIS81139242ST-4-0	CTR	F	64	20	FRA
ERR1018290	CRC	M	78	27	CHI
DRR171687	CRC	M	57	27.0169	JAP
CCIS87116798ST-4-0	CRC	F	85	20.31	FRA
DRR171722	CTR	M	35	24.2215	JAP
ERR1018193	CTR	M	62	21.7	CHI
CCIS59132091ST-4-0	CRC	F	80	23.19	FRA
DRR171557	CRC	M	62	19.8347	JAP
CCMD46222674ST-21-0	CRC	M	59	24	GER
DRR127524	CTR	M	73	25.8166	JAP
CCMD29706695ST-11-0	CTR	M	45	22.1	GER
DRR127567	CRC	F	70	17.3484	JAP
DRR171725	CTR	M	60	22.2291	JAP
DRR171669	CRC	M	69	22.7583	JAP
CCIS94603952ST-4-0	CTR	F	80	21	FRA
CCIS41288781ST-4-0	CRC	F	74	19	FRA
CCMD39882286ST-11-0	CTR	M	53	18.5	GER
DRR171822	CRC	F	66	20.4294	JAP
DRR171692	CRC	M	45	22.2753	JAP
DRR127724	CTR	F	66	25.4109	JAP
DRR127752	CTR	M	70	23.6614	JAP
DRR171749	CRC	F	73	16.8802	JAP
DRR171538	CTR	M	66	24.8016	JAP
CCIS09568613ST-4-0	CTR	M	67	21	FRA
CCMD11006829ST-21-0	CRC	F	42	35	GER
ERR1018248	CTR	M	52	28.4	CHI
DRR171943	CTR	M	66	23.4375	JAP
DRR171503	CTR	M	60	19.487	JAP
DRR171588	CTR	F	79	24.6094	JAP
ERR688567	CRC	M	54	27.3356	AUS
DRR171745	CTR	M	50	24.8163	JAP
DRR171674	CRC	F	64	29.6766	JAP
DRR127755	CTR	M	70	25.7117	JAP
DRR171949	CRC	M	57	26.881	JAP
DRR171955	CRC	M	73	22.3214	JAP
CCIS21126322ST-4-0	CTR	M	59	25	FRA
CCMD26625622ST-11-0	CTR	M	50	21.6	GER
CCIS23164343ST-4-0	CTR	M	62	23	FRA
DRR171954	CTR	M	65	23.6652	JAP
ERR1018300	CRC	M	77	20.2	CHI
DRR171960	CRC	M	61	22.2291	JAP
DRR171459	CRC	F	69	22.5069	JAP
CCIS11362406ST-4-0	CTR	F	44	26	FRA
DRR171845	CTR	M	73	24.3025	JAP
ERR688535	CTR	M	63	30.4	AUS
DRR171698	CTR	M	62	21.7079	JAP
ERR688517	CRC	F	65	23.3067	AUS
CCMD30626189ST-11-0	CTR	M	51	26.3	GER
DRR171644	CTR	F	21	17.898	JAP
DRR171785	CRC	M	73	24.6097	JAP
DRR127478	CRC	F	66	22.6003	JAP
DRR171666	CRC	M	43	21.6333	JAP
ERR688581	CRC	M	74	24.3375	AUS
DRR171814	CRC	M	50	23.49	JAP
ERR1018226	CRC	F	54	25.6	CHI
ERR1018276	CTR	M	61	23.7	CHI
DRR171595	CRC	M	66	28.9341	JAP
DRR127619	CTR	M	45	23.9512	JAP
DRR171887	CRC	F	73	18.3143	JAP
CCMD63399960ST-21-0	CRC	M	51	28	GER
CCIS65479369ST-4-0	CRC	F	69	25	FRA
CCMD48236717ST-21-0	CRC	F	58	32	GER
ERR1018202	CRC	F	89	23.7	CHI
ERR688579	CRC	F	52	27.1416	AUS
CCMD23101338ST-21-0	CRC	M	69	28	GER
CCIS77252613ST-4-0	CRC	M	65	26	FRA
ERR688559	CTR	F	72	28.7	AUS
DRR171683	CRC	M	68	23.4375	JAP
ERR688544	CTR	F	66	21.7	AUS
DRR171679	CRC	M	53	31.2314	JAP
DRR171741	CTR	F	78	24.0344	JAP
DRR171844	CRC	F	70	23.1405	JAP
DRR171589	CTR	M	38	22.4996	JAP
DRR171907	CRC	M	60	21.2953	JAP
DRR171689	CTR	F	76	21.5019	JAP
DRR171939	CTR	F	72	22.3703	JAP
DRR171581	CTR	M	54	23.5294	JAP
DRR171654	CTR	M	70	17.9688	JAP
DRR171546	CTR	M	48	21.6721	JAP
DRR171525	CTR	F	43	16.7969	JAP
DRR171684	CRC	M	40	22.5981	JAP
DRR171622	CRC	F	68	25.6837	JAP
DRR127594	CRC	M	69	21.5139	JAP
ERR1018284	CRC	M	77	22	CHI
ERR1018196	CRC	M	65	24.8	CHI
ERR688603	CTR	F	71	29	AUS
ERR688551	CTR	M	65	28.9	AUS
DRR171563	CTR	M	32	18.7328	JAP
DRR171909	CRC	F	59	20.5049	JAP
CCIS02379307ST-4-0	CRC	M	67	28	FRA
CCMD82866709ST-21-0	CRC	F	77	26	GER
DRR171710	CTR	F	49	20.83	JAP
DRR171597	CRC	M	51	26.6436	JAP
CCIS15704761ST-4-0	CRC	F	56	22.3081	FRA
DRR171891	CRC	M	64	20.4467	JAP
ERR688643	CRC	F	72	23.8281	AUS
CCMD27867141ST-11-0	CTR	F	55	18	GER
ERR1018253	CTR	M	53	19.7	CHI
DRR171728	CRC	M	47	23.5666	JAP
CCMD98531134ST-11-0	CRC	M	59	26.5	GER
DRR171487	CTR	M	67	25.0995	JAP
DRR171719	CTR	M	46	21.7994	JAP
DRR171592	CTR	M	61	26.4236	JAP
CCMD95431029ST-11-0	CRC	M	84	24	GER
CCMD76222476ST-11-0	CRC	F	62	21.3	GER
CCMD54057834ST-11-0	CTR	F	57	21.2	GER
ERR688528	CTR	F	68	21.7	AUS
DRR171533	CRC	F	61	22.4766	JAP
CCMD50529145ST-11-0	CTR	F	63	20.2	GER
DRR171773	CTR	F	71	24.6094	JAP
ERR1018210	CRC	M	80	24	CHI
DRR171514	CTR	F	68	18.662	JAP
DRR171477	CTR	F	67	21.9076	JAP
CCIS63448910ST-4-0	CTR	F	61	34	FRA
CCMD46947453ST-21-0	CRC	M	69	24	GER
DRR171492	CRC	M	65	20.2449	JAP
CCIS71301801ST-4-0	CRC	F	50	24	FRA
DRR171642	CTR	F	35	22.1893	JAP
DRR171766	CRC	M	69	19.433	JAP
ERR1018220	CRC	M	56	25.9	CHI
CCIS05314658ST-4-0	CTR	F	65	24	FRA
DRR127535	CTR	M	64	20.5191	JAP
CCIS78100604ST-4-0	CTR	F	64	30	FRA
DRR127532	CTR	F	59	20.0288	JAP
DRR171706	CRC	F	67	24.4444	JAP
ERR688573	CRC	M	46	30.8642	AUS
CCIS55230578ST-4-0	CRC	M	64	30	FRA
DRR171880	CRC	M	63	19.7531	JAP
DRR171569	CTR	M	63	21.1073	JAP
ERR1018214	CRC	F	51	19.6	CHI
CCIS46467422ST-4-0	CRC	F	54	22	FRA
ERR688523	CTR	M	67	22.79	AUS
ERR1018291	CRC	F	49	22.6	CHI
DRR162776	CTR	F	66	22.3478	JAP
CCIS14449628ST-4-0	CRC	F	59	20	FRA
DRR171536	CRC	M	66	23.8751	JAP
DRR171890	CTR	M	69	24.281	JAP
DRR171958	CRC	F	71	29.9643	JAP
DRR171789	CRC	F	73	19.563	JAP
ERR688511	CTR	M	73	29.7	AUS
DRR171551	CRC	M	44	28.9979	JAP
DRR171565	CTR	M	34	21.8573	JAP
DRR171862	CTR	F	61	18.591	JAP
MMPU84450604ST	CTR	M	37	25	GER
DRR171678	CRC	F	72	20.3244	JAP
DRR171715	CTR	M	43	24.7409	JAP
DRR127485	CRC	F	70	21.9076	JAP
DRR127756	CTR	M	75	22.3081	JAP
ERR688570	CRC	F	64	24.0882	AUS
DRR173016	CTR	M	56	26.8544	JAP
ERR1018266	CTR	F	73	24.1	CHI
ERR1018225	CRC	M	62	22.7	CHI
CCIS35100175ST-4-0	CRC	M	73	40	FRA
DRR171606	CTR	M	72	22.9481	JAP
ERR688639	CRC	M	64	29.0688	AUS
CCMD85661207ST-11-0	CTR	M	28	24.6	GER
ERR1018213	CRC	M	63	24.4	CHI
CCIS34055159ST-4-0	CRC	M	80	29.4	FRA
CCIS83870198ST-4-0	CRC	F	48	24	FRA
ERR688548	CRC	M	68	32.2494	AUS
ERR710429	CTR	M	68	23.5294	AUS
CCIS41222843ST-4-0	CRC	F	73	24	FRA
CCMD45988061ST-21-0	CRC	F	62	27	GER
DRR171677	CRC	M	71	21.0498	JAP
DRR171784	CRC	F	63	20.1348	JAP
ERR1018227	CRC	M	69	29	CHI
DRR171797	CRC	M	53	20.7612	JAP
DRR171517	CTR	M	46	22.4712	JAP
CCIS81887263ST-4-0	CRC	M	59	27	FRA
DRR171559	CRC	M	76	19.0039	JAP
ERR1018244	CTR	M	50	20.5	CHI
CCMD38158721ST-11-0	CTR	M	76	29.5	GER
CCMD79987997ST-21-0	CRC	M	70	25	GER
ERR688518	CTR	M	70	22.64	AUS
ERR688647	CRC	M	63	33.564	AUS
DRR127669	CRC	F	54	20.5688	JAP
DRR171848	CRC	M	66	18.7109	JAP
CCIS88007743ST-4-0	CTR	F	67	23	FRA
DRR171758	CRC	M	67	23.597	JAP
DRR171846	CRC	M	71	22.4813	JAP
CCMD27463710ST-11-0	CRC	M	81	26.1	GER
DRR127776	CTR	F	73	20.7031	JAP
DRR171599	CTR	M	74	24.6094	JAP
ERR710426	CTR	M	55	27.7634	AUS
DRR171513	CTR	F	54	20.7756	JAP
ERR1018250	CTR	M	58	23.1	CHI
CCIS90164298ST-4-0	CTR	M	84	23	FRA
DRR171648	CTR	M	52	27.6361	JAP
DRR171650	CTR	F	51	21.9076	JAP
ERR688563	CTR	F	69	22.4	AUS
ERR1018198	CRC	M	50	25.2	CHI
DRR171543	CTR	F	61	21.0772	JAP
DRR171768	CRC	F	69	20.6131	JAP
ERR1018201	CRC	F	45	23	CHI
CCMD71242853ST-11-0	CRC	F	56	30	GER
ERR688520	CTR	M	65	29.06	AUS
ERR710430	CTR	M	78	31.2213	AUS
DRR171643	CTR	M	57	30.1162	JAP
DRR171731	CRC	M	45	20.6193	JAP
ERR688557	CTR	M	66	29.98	AUS
DRR171661	CRC	F	49	19.2894	JAP
ERR1018270	CTR	M	58	26.3	CHI
DRR171915	CTR	F	65	24.3232	JAP
MMPU29365221ST	CTR	M	34	23	GER
DRR171598	CTR	F	58	17.9089	JAP
DRR171630	CRC	M	58	20.5151	JAP
DRR171555	CTR	M	77	20.5714	JAP
DRR171867	CRC	F	70	23.0681	JAP
DRR171696	CRC	M	69	23.8751	JAP
ERR688610	CTR	F	70	22.67	AUS
DRR171675	CRC	F	63	23.5556	JAP
DRR171961	CRC	F	64	24.2188	JAP
DRR171853	CRC	M	65	27.1809	JAP
ERR1018279	CRC	M	60	20	CHI
CCIS50148151ST-4-0	CRC	F	87	15.15	FRA
DRR171624	CTR	F	62	20.2395	JAP
ERR1018296	CRC	M	76	21.9	CHI
CCMD28738636ST-11-0	CTR	M	73	24.8	GER
DRR127731	CTR	M	66	23.6652	JAP
DRR171668	CRC	M	51	22.2291	JAP
DRR171850	CTR	F	74	24.3496	JAP
CCMD15562448ST-11-0	CTR	M	74	22.9	GER

## Sheet: example_test_abundance
	'Catharanthus roseus' aster yellows phytoplasma	Acaryochloris marina	Acetoanaerobium sticklandii	Acetobacter aceti	Acetobacter ascendens	Acetobacter ghanensis	Acetobacter orientalis	Acetobacter oryzifermentans	Acetobacter oryzoeni	Acetobacter pasteurianus	Acetobacter persici	Acetobacter pomorum	Acetobacter senegalensis	Acetobacter sp. KACC 21233	Acetobacter tropicalis	Acetobacteraceae bacterium	Acetobacterium sp. KB-1	Acetobacterium woodii	Acetohalobium arabaticum	Acetomicrobium mobile	Acholeplasma axanthum	Acholeplasma brassicae	Acholeplasma hippikon	Acholeplasma laidlawii	Acholeplasma oculi	Acholeplasma palmae	Achromobacter denitrificans	Achromobacter insolitus	Achromobacter ruhlandii	Achromobacter sp. AONIH1	Achromobacter sp. B7	Achromobacter sp. MFA1 R4	Achromobacter spanius	Achromobacter xylosoxidans	Acidaminococcus fermentans	Acidaminococcus intestini	Acidibrevibacterium fodinaquatile	Acidiferrobacter sp. SPIII_3	Acidihalobacter ferrooxidans	Acidihalobacter prosperus	Acidimicrobium ferrooxidans	Acidiphilium cryptum	Acidiphilium multivorum	Acidipropionibacterium acidipropionici	Acidipropionibacterium jensenii	Acidipropionibacterium virtanenii	Acidisarcina polymorpha	Acidithiobacillus caldus	Acidithiobacillus ferridurans
MMRS11288076ST-27-0-0	179	73	613	91	129	202	141	127	10	246	120	0	37	80	81	207	873	847	273	83	734	391	297	733	504	278	251	147	150	319	201	106	494	1332	1150	723	146	142	127	181	20	56	56	193	207	83	160	80	47
MMRS11932626ST-27-0-0	0	92	444	128	156	59	85	0	20	153	66	0	31	53	65	123	449	408	335	66	205	159	127	163	178	189	244	75	39	282	50	70	233	791	2251	1594	65	74	97	117	37	18	51	105	82	99	141	69	33
MMRS12272136ST-27-0-0	0	106	409	125	227	51	120	16	36	244	147	114	34	110	65	269	417	576	208	75	140	99	116	118	139	143	417	189	0	292	90	64	341	1447	1680	1097	151	107	133	148	55	31	71	253	226	99	158	146	75
MMRS14379078ST-27-0-0	14	47	238	118	43	41	94	11	40	203	65	0	50	52	42	30	439	304	100	59	267	121	103	67	184	77	252	170	336	236	132	75	411	959	939	379	51	55	29	138	24	46	60	104	51	65	71	47	35
MMRS14602194ST-27-0-0	34	181	630	181	317	70	101	12	30	164	147	83	84	103	141	254	911	799	241	242	244	319	203	182	253	126	353	191	277	172	188	75	386	798	2139	1957	56	142	92	243	48	65	80	196	235	149	292	168	65
MMRS15137911ST-27-0-0	7	97	594	116	86	90	23	62	24	99	126	264	67	141	146	57	1090	616	436	97	159	177	109	180	78	154	384	283	512	488	245	294	534	1667	1804	798	231	122	177	345	73	198	138	455	401	201	264	273	10
MMRS16644320ST-27-0-0	0	149	617	93	106	96	103	0	36	309	90	167	82	51	37	315	689	1427	224	223	208	440	293	246	240	204	763	281	0	142	113	112	471	1227	2079	364052	149	103	164	188	92	85	70	154	162	106	202	162	222
MMRS17603756ST-27-0-0	0	31	284	92	35	47	142	0	37	349	65	0	79	16	26	110	529	439	224	31	93	131	122	160	144	156	629	146	0	242	114	125	317	1430	1378	383407	69	40	205	190	27	8	90	91	137	89	100	88	85
MMRS17963147ST-27-0-0	32	31	265	189	142	58	75	10	100	145	47	147	20	27	10	102	438	531	104	136	103	118	115	84	95	102	309	138	0	133	50	56	288	850	885	783	28	36	52	235	33	38	59	87	77	48	70	91	24
MMRS18295921ST-27-0-0	10	161	695	94	198	77	52	0	163	231	83	0	33	89	91	488	524	542	274	199	144	361	107	622	139	167	575	283	161	467	141	446	658	3152	2441	1512	187	254	124	531	55	84	58	208	155	166	155	130	23
MMRS20257302ST-27-0-0	32	112	552	245	161	133	143	260	66	188	201	0	58	104	112	219	639	595	198	169	446	227	338	274	201	298	596	342	0	515	204	210	549	2129	2205	1118	203	216	228	317	114	74	135	294	270	194	203	153	40
MMRS21365932ST-27-0-0	36	126	849	271	186	163	238	18	168	489	188	0	185	130	85	198	1425	764	552	140	764	826	604	458	591	607	609	368	143	943	224	214	990	2479	2243	1226	159	115	255	310	126	90	139	293	195	223	253	300	87
MMRS24340226ST-27-0-0	0	58	403	40	70	52	54	0	25	87	45	0	60	50	15	97	747	519	140	43	83	66	52	79	260	40	69	53	0	94	91	12	79	383	1428	292135	20	59	3	73	4	5	9	83	46	21	89	24	34
MMRS25211151ST-27-0-0	6	55	528	58	41	37	76	106	13	85	67	0	20	40	33	112	469	411	354	60	375	129	564	133	196	287	267	107	33	72	27	73	121	495	1026	736	43	49	42	94	26	67	23	59	80	39	65	85	50
MMRS25641480ST-27-0-0	64	89	697	191	226	176	48	88	67	476	187	0	137	236	77	185	1256	828	394	121	333	222	131	173	96	280	739	209	126	1027	123	108	637	1552	2326	267213	131	210	267	507	63	67	203	268	132	280	432	198	35
MMRS29805707ST-27-0-0	0	64	904	65	106	64	112	8	73	180	180	186	5	46	49	136	723	630	306	172	429	287	247	143	211	129	419	150	0	242	90	46	224	1234	1229	963	73	88	139	179	21	55	25	102	131	50	189	60	95
MMRS31306426ST-27-0-0	11	106	565	53	40	104	72	55	48	246	82	0	27	28	20	100	445	226	207	209	232	183	42	43	80	241	109	91	101	75	55	39	136	406	555	3361	81	16	97	57	19	10	38	50	82	11	63	62	67
MMRS32573774ST-27-0-0	70	172	1254	378	235	228	149	96	16	214	165	228	48	144	54	318	977	791	323	218	517	339	401	444	333	372	786	192	37	798	144	214	613	2297	1886	1173	193	152	233	297	70	125	70	334	313	191	358	161	64
MMRS33294861ST-27-0-0	77	138	900	96	69	75	78	3	11	76	90	210	22	77	25	143	673	619	313	115	684	571	521	418	413	486	323	127	78	314	79	77	248	1096	1894	1106	97	76	80	216	77	106	47	151	149	98	217	125	66
MMRS34525504ST-27-0-0	3	33	181	83	31	34	29	21	81	82	54	93	31	52	27	108	230	610	115	47	114	86	77	558	99	114	238	325	30	189	39	191	207	933	1366	2231	52	85	28	317	79	43	28	88	57	62	81	87	41
MMRS34569532ST-27-0-0	43	129	769	150	179	285	105	44	59	380	142	0	39	150	156	490	698	686	458	148	923	406	339	496	630	585	929	256	222	545	235	236	1154	1747	1721	882	109	174	369	497	83	458	60	402	178	236	222	210	45
MMRS35808664ST-27-0-0	23	62	1027	74	64	36	76	0	69	235	70	0	25	53	56	178	416	419	252	69	309	122	154	503	195	212	252	117	62	76	42	354	270	1175	1119	9073	41	58	74	448	33	8	59	119	123	98	112	68	13
MMRS36405092ST-27-0-0	28	47	380	140	55	40	127	131	1	55	119	114	7	61	37	168	925	559	187	40	256	161	259	91	179	193	229	121	197	235	40	41	128	584	1062	1893	40	61	65	144	16	31	19	116	76	71	227	85	35
MMRS38861560ST-27-0-0	23	91	1173	144	129	77	66	49	39	99	137	0	43	79	220	314	846	935	335	304	413	401	239	228	242	242	621	179	0	466	56	111	525	1656	1268	1084	187	106	81	236	78	77	60	198	172	158	195	94	83
MMRS38954404ST-27-0-0	143	158	1229	168	159	142	140	9	42	276	131	122	42	83	201	185	964	737	407	165	1155	622	797	606	720	997	797	289	37	433	150	250	579	1823	2020	856	172	121	162	204	118	58	113	250	318	123	281	186	68
MMRS39415781ST-27-0-0	45	135	793	150	110	136	89	12	159	271	249	0	72	113	80	186	727	618	460	113	518	338	151	152	128	175	253	143	218	117	148	78	150	839	975	651	93	61	77	139	23	52	15	156	103	57	88	55	2
MMRS39582183ST-27-0-0	54	64	1003	145	143	132	87	17	108	144	106	154	33	165	85	441	855	855	443	376	1758	877	1045	918	1243	1063	663	299	0	669	195	243	946	2106	4759	3712	137	142	329	361	157	146	113	218	237	202	284	149	66
MMRS40913371ST-27-0-0	41	292	304	182	114	87	92	67	45	158	124	0	136	68	86	135	637	757	203	60	175	101	243	95	86	314	373	170	134	542	86	65	249	1118	1626	256962	49	61	88	188	37	7	65	99	164	68	90	68	109
MMRS41266697ST-27-0-0	13	110	356	52	84	91	74	0	42	250	86	0	37	92	194	80	470	357	214	74	100	65	46	50	32	57	244	191	89	81	77	48	233	417	858	525	71	44	104	119	17	51	55	106	121	79	73	86	0
MMRS41711735ST-27-0-0	0	8	64	36	36	62	11	3	3	24	32	32	26	23	39	18	174	178	50	34	22	81	31	12	15	19	225	87	124	56	43	49	82	460	452	3560	22	40	70	113	29	0	101	91	63	74	72	78	19
MMRS42780924ST-27-0-0	32	81	843	71	86	155	381	6	90	1169	120	88	137	83	50	145	1116	865	425	50	336	302	326	236	391	559	1495	310	626	748	149	160	358	3508	2375	1060	61	54	560	245	80	18	121	121	378	80	147	257	577
MMRS43563715ST-27-0-0	0	255	651	216	185	44	86	12	37	360	107	0	31	84	133	456	498	514	188	140	274	274	172	407	142	122	764	298	143	329	120	310	465	1814	1579	163652	111	53	195	338	47	48	41	124	163	81	137	126	20
MMRS43939546ST-27-0-0	13	70	550	57	142	31	39	46	92	181	61	0	37	71	84	166	863	793	244	85	284	280	223	215	87	98	173	119	134	147	94	43	257	828	942	704	74	82	121	167	22	56	52	146	119	96	149	99	30
MMRS44197125ST-27-0-0	40	95	335	78	109	47	64	112	25	53	75	0	57	44	35	84	358	407	149	139	230	217	165	172	135	187	226	141	222	256	72	60	306	788	882	475	73	80	71	162	21	35	65	162	92	129	125	72	4
MMRS44203591ST-27-0-0	0	6	97	13	26	15	1	16	1	28	15	0	15	15	8	91	293	153	36	21	21	16	34	11	44	31	21	19	0	17	10	8	31	102	256	347	5	26	3	39	5	2	5	16	9	15	36	7	20
MMRS44587603ST-27-0-0	3	47	381	190	113	91	77	43	74	187	93	75	59	156	68	298	711	360	189	223	109	224	93	287	138	102	567	341	139	527	172	256	511	2207	2430	1627	212	227	160	339	136	106	88	296	221	146	284	210	37
MMRS47662059ST-27-0-0	20	73	323	150	90	56	42	0	23	261	78	0	32	47	80	88	526	355	129	48	193	233	159	163	106	173	241	105	0	124	74	55	241	785	1220	718	97	62	126	136	54	40	38	101	90	79	117	74	74
MMRS47685461ST-27-0-0	0	78	183	152	85	10	10	24	21	36	52	116	7	23	155	88	469	571	204	62	125	65	150	68	47	51	104	104	0	96	100	33	83	230	853	600	46	27	23	123	9	11	27	72	48	21	77	108	84
MMRS51307502ST-27-0-0	9	83	298	383	141	176	154	45	27	364	204	249	117	441	263	158	743	363	208	159	63	157	63	248	31	42	1516	649	68	1535	454	399	1690	6184	3558	1981	744	371	307	431	271	171	167	766	614	334	379	404	155
MMRS51410669ST-27-0-0	22	157	689	451	170	257	67	15	19	281	133	376	37	183	90	155	849	845	334	200	511	208	302	314	259	388	843	317	164	456	122	185	556	2802	2071	1650	244	146	169	330	187	155	54	306	244	163	368	139	42
MMRS51728985ST-27-0-0	0	3	23	2	0	0	0	0	0	7	0	0	0	0	0	0	5	7	3	0	3	0	4	3	4	4	47	6	0	24	2	41	75	133	7	14	0	4	14	17	0	0	6	0	3	6	0	10	0
MMRS51737257ST-27-0-0	0	346	1003	331	264	115	96	34	52	423	256	45	223	75	59	388	1319	850	451	306	986	521	403	423	512	475	705	292	209	491	167	153	534	1803	2540	1832	180	162	395	221	83	152	65	232	274	199	194	128	103
MMRS54246132ST-27-0-0	0	126	494	85	122	76	107	16	179	231	106	0	122	58	86	424	618	682	257	125	200	229	216	566	164	250	514	249	103	356	132	548	387	1906	6228	7431	138	167	99	654	124	99	54	127	169	130	159	96	33
MMRS54316675ST-27-0-0	16	170	772	172	167	128	121	18	152	209	181	0	60	133	87	139	614	407	306	169	584	254	320	422	316	332	612	238	198	651	191	356	701	2026	2575	42263	164	129	212	324	121	66	110	302	318	256	313	99	64
MMRS55294627ST-27-0-0	0	35	498	79	83	181	63	107	27	86	71	53	20	195	36	254	964	475	465	215	291	173	48	308	70	108	361	356	180	333	91	108	553	1640	1816	361381	84	142	270	321	48	59	85	223	184	148	241	103	46
MMRS56137463ST-27-0-0	34	185	369	47	137	27	65	28	31	168	45	0	28	26	9	87	469	362	146	49	179	168	96	59	37	98	242	39	66	106	29	25	90	900	554	352	24	34	62	97	79	0	41	64	83	85	36	37	120
MMRS57276462ST-27-0-0	56	159	945	234	141	154	74	222	38	240	112	211	40	135	59	261	736	916	469	314	808	430	582	783	544	665	745	247	60	377	118	123	504	2283	3103	2296	179	151	137	263	135	71	74	211	150	84	319	120	87
MMRS57569834ST-27-0-0	0	173	589	44	29	52	5	20	7	90	74	89	67	24	27	195	364	404	242	43	117	23	136	171	80	229	171	87	169	431	48	224	490	1227	798	43498	25	59	44	194	30	11	79	87	113	48	70	86	68
MMRS59699117ST-27-0-0	0	17	195	10	67	57	30	6	5	63	33	0	24	27	32	118	223	217	174	36	115	82	84	46	103	108	144	42	0	124	22	8	42	370	575	4238	6	25	6	75	6	32	3	31	32	18	23	55	34
MMRS61683006ST-27-0-0	38	79	873	110	177	52	82	4	41	264	110	391	37	42	51	178	962	1357	415	117	327	205	196	184	202	303	448	196	256	339	103	61	404	1013	1467	828	28	71	168	156	98	9	128	204	143	78	161	54	144
MMRS62192467ST-27-0-0	0	65	1195	86	21	73	27	182	4	62	124	0	17	7	58	199	984	1024	388	40	239	168	102	167	140	250	62	94	60	61	23	35	108	275	925	742	33	14	7	103	1	0	16	72	28	19	113	73	61
MMRS62376181ST-27-0-0	0	118	294	184	63	185	255	32	44	379	168	74	109	117	107	119	846	600	212	86	155	106	88	104	136	197	448	164	319	473	68	93	266	1118	1826	1313	49	53	70	181	35	21	79	92	147	72	101	76	160
MMRS62666492ST-27-0-0	16	88	792	210	284	120	51	34	19	219	137	0	29	119	89	92	508	549	243	85	526	376	291	409	446	329	494	186	94	383	85	251	607	1894	1481	817	160	131	170	323	83	50	84	189	284	152	278	125	64
MMRS64281211ST-27-0-0	15	108	528	49	38	99	7	41	56	260	122	0	24	46	65	42	575	573	189	111	244	134	93	89	46	137	365	249	0	389	83	138	269	1084	1531	967	72	37	60	200	42	21	167	161	164	69	97	102	64
MMRS64281551ST-27-0-0	10	81	690	44	167	62	40	0	25	170	93	0	26	54	35	299	201	270	108	29	199	136	205	643	183	192	109	88	28	151	47	619	180	874	1306	1385	35	74	71	367	9	2	32	112	58	61	162	52	8
MMRS65205033ST-27-0-0	0	51	255	96	59	40	34	0	6	197	131	69	76	69	31	84	277	418	325	54	215	96	107	129	170	134	876	136	87	391	133	98	510	1164	19368	1199	228	52	165	377	43	202	78	131	251	292	124	69	16
MMRS65742083ST-27-0-0	39	200	508	289	149	102	176	209	17	145	131	0	28	161	318	202	839	723	278	209	253	376	331	364	329	458	421	224	106	171	94	240	382	1316	3526	1139	135	144	122	368	61	110	60	282	262	224	246	281	21
MMRS65862658ST-27-0-0	17	143	642	132	235	113	107	4	21	174	119	334	76	100	60	211	785	643	339	93	346	126	241	181	279	190	352	178	32	288	88	104	529	1167	1608	1121	99	73	176	266	68	111	66	116	142	77	134	67	46
MMRS65945127ST-27-0-0	0	83	952	159	67	39	29	0	0	517	51	0	62	24	21	86	1340	1049	175	205	280	54	128	76	146	123	26	145	0	59	13	120	129	438	1787	1525	1	10	70	97	10	166	31	35	11	0	137	30	34
MMRS66868025ST-27-0-0	0	127	117	231	136	118	179	61	37	568	265	0	178	157	75	28	457	320	86	88	24	116	35	46	22	19	2036	499	288	1173	328	248	1170	4966	3651	1363	192	219	722	608	169	170	260	739	609	501	347	306	43
MMRS67096717ST-27-0-0	6	66	248	86	55	37	30	0	11	138	38	46	41	55	15	62	400	411	200	74	242	247	203	378	234	213	241	120	57	141	58	60	178	872	741	30692	46	72	57	119	33	50	46	129	79	85	81	49	20
MMRS67247116ST-27-0-0	26	143	565	575	588	209	359	73	33	638	655	0	307	334	826	743	932	967	246	111	190	407	267	235	174	100	655	268	185	484	131	258	512	1578	2290	271402	163	244	722	223	39	28	275	123	171	160	323	99	76
MMRS68630931ST-27-0-0	0	94	642	194	94	34	41	10	33	180	87	0	36	86	14	124	473	573	394	82	285	118	167	120	67	185	369	94	33	154	91	37	225	987	754	561	31	94	165	126	23	34	44	85	154	70	122	74	29
MMRS68910755ST-27-0-0	0	110	466	92	79	34	43	45	40	277	77	0	46	42	94	103	655	636	334	92	314	158	124	120	122	366	300	119	148	192	114	123	149	919	1085	926	41	54	71	122	18	45	47	88	67	48	163	108	0
MMRS71762412ST-27-0-0	0	47	437	111	83	69	21	57	42	297	89	0	63	85	71	416	552	487	340	323	313	74	231	131	182	133	469	143	255	495	85	114	416	1386	1298	1116	332	125	87	190	81	166	278	188	218	147	186	112	1
MMRS72802364ST-27-0-0	2	150	699	59	224	39	52	28	47	101	103	0	22	104	57	106	687	618	258	67	193	236	220	237	253	213	324	178	241	158	102	137	289	778	2021	1565	54	55	125	231	135	44	60	97	170	114	133	86	57
MMRS72980899ST-27-0-0	0	41	581	80	113	93	57	93	3	333	79	0	55	54	69	62	708	773	535	66	293	226	134	125	400	79	242	165	437	187	162	97	181	1034	1586	1258562	25	75	120	167	14	22	76	220	174	67	128	50	0
MMRS73787048ST-27-0-0	15	205	1070	192	210	146	120	10	144	326	183	0	82	99	147	276	948	812	321	274	598	571	633	200	176	375	439	216	417	468	139	140	759	1230	2116	2434	265	168	179	316	92	112	47	356	330	245	225	117	49
MMRS77018926ST-27-0-0	0	167	298	453	209	191	245	34	221	480	303	0	86	268	215	178	856	602	168	181	81	193	119	212	91	78	1850	1246	100	1845	387	342	1336	6918	3674	1481	568	545	491	452	288	274	255	752	829	357	481	329	304
MMRS77321055ST-27-0-0	0	137	497	91	142	86	54	11	49	205	87	0	53	67	79	196	704	566	241	62	292	212	170	84	176	223	307	323	295	228	117	68	404	913	1365	14084	91	127	95	236	81	108	70	150	193	155	183	167	0
MMRS77487595ST-27-0-0	0	122	580	146	174	263	153	72	3	248	170	0	28	219	324	189	889	861	814	244	513	210	181	456	267	451	799	342	57	445	147	315	576	2142	2778	1924	265	165	348	498	160	183	118	349	190	202	284	185	85
MMRS78791111ST-27-0-0	4	84	618	64	173	22	36	129	87	97	76	0	18	21	74	287	521	1024	708	89	292	142	198	493	167	251	276	115	107	303	77	87	319	1466	1605	123755	18	61	98	210	67	132	10	63	66	197	108	50	5
MMRS79893829ST-27-0-0	0	55	205	395	200	55	256	20	14	298	116	0	13	52	18	76	346	305	74	260	31	231	123	65	39	35	584	191	76	326	107	64	404	1714	1449	1555	181	86	51	161	56	49	45	103	263	113	151	111	18
MMRS80093644ST-27-0-0	0	59	273	74	70	30	40	14	3	223	145	0	56	134	141	68	708	555	160	112	174	229	111	193	304	298	351	135	385	364	192	155	377	1771	1374	2648	211	59	151	228	129	137	106	351	361	209	260	175	75
MMRS81130264ST-27-0-0	27	117	259	29	146	71	34	22	42	156	53	0	24	35	75	78	440	502	97	36	157	46	67	52	58	121	280	78	78	94	74	24	154	890	992	612	10	33	44	82	1	0	49	34	71	7	40	38	21
MMRS81135225ST-27-0-0	65	118	422	260	119	83	123	83	33	416	202	0	60	70	53	133	487	695	198	89	312	253	227	286	152	271	594	149	36	270	113	92	579	1564	1834	3418	56	59	256	223	79	37	47	90	87	59	106	98	23
MMRS81194191ST-27-0-0	0	51	186	76	162	53	76	0	38	157	52	0	35	38	75	156	312	338	173	44	117	89	117	61	47	117	309	109	54	155	52	110	461	1246	551	498	116	91	116	250	13	31	32	171	63	86	89	46	122
MMRS81671217ST-27-0-0	12	236	906	137	147	79	103	78	44	244	195	211	69	74	54	269	1277	854	508	117	814	315	486	596	498	598	404	161	29	357	114	254	400	1219	2793	1964	116	144	173	314	128	113	40	264	219	123	240	156	25
MMRS84085284ST-27-0-0	0	51	372	43	79	73	24	8	53	148	99	0	61	34	29	122	639	507	154	44	143	133	150	243	165	236	358	91	0	182	64	131	252	1040	914	761	69	67	60	316	18	10	85	41	64	45	126	60	33
MMRS84159866ST-27-0-0	74	123	728	414	315	150	230	161	39	167	199	136	35	212	252	373	753	1092	522	222	1454	868	1121	527	1051	1006	843	296	223	695	304	277	728	2617	2572	1903	201	184	173	348	170	63	220	420	471	247	235	236	80
MMRS84954772ST-27-0-0	0	99	520	257	221	139	129	49	36	399	265	0	69	117	166	295	627	626	244	144	160	241	171	172	142	200	529	192	36	222	86	143	479	1220	1016	540	164	162	242	171	34	39	136	146	152	116	130	84	16
MMRS85382779ST-27-0-0	13	119	612	176	76	72	56	28	25	153	108	222	44	136	90	73	594	589	363	61	238	300	201	151	168	268	413	281	69	159	140	133	478	1299	1565	979	194	115	76	178	90	55	102	218	132	147	112	119	88
MMRS85438660ST-27-0-0	0	51	234	98	355	44	76	0	0	55	120	0	5	27	44	49	388	380	192	195	196	300	268	130	85	123	72	104	0	334	83	16	24	740	880	452	25	35	24	134	14	0	23	92	14	7	197	51	24
MMRS85548821ST-27-0-0	0	77	251	60	51	40	46	38	24	206	44	0	21	35	38	145	367	391	71	216	100	191	81	100	124	90	269	203	40	320	88	71	611	1028	1387	7821	46	55	66	176	48	135	24	109	159	66	64	61	21
MMRS86168210ST-27-0-0	0	151	165	411	106	365	52	351	32	280	349	0	122	456	151	118	627	356	144	154	79	81	44	69	46	85	1334	684	39	1125	533	468	1372	4473	4482	3476	405	342	350	525	259	312	224	1012	942	487	347	300	34
MMRS86178473ST-27-0-0	27	60	656	135	169	62	53	32	24	244	98	53	58	52	61	216	862	579	201	228	181	409	93	284	144	77	563	220	135	197	72	103	494	1106	1464	906	84	82	99	160	47	57	40	121	195	102	124	63	56
MMRS86958796ST-27-0-0	32	81	352	48	55	20	21	6	8	22	64	144	5	16	45	117	370	455	121	22	153	106	73	54	98	53	119	59	68	148	44	39	115	408	505	876	16	47	34	57	23	5	28	40	48	30	109	36	26
MMRS87723283ST-27-0-0	43	108	554	36	68	44	53	14	16	150	170	0	141	25	44	172	733	596	138	31	169	178	168	139	155	133	309	163	0	192	38	98	273	983	1497	70988	25	61	60	137	51	67	54	60	149	104	98	51	29
MMRS88581325ST-27-0-0	28	203	1367	183	169	126	78	50	25	387	167	0	82	58	67	165	1043	704	453	172	1413	566	676	478	731	592	638	266	0	329	122	133	697	1827	2331	11901	119	114	229	232	100	98	56	153	228	166	322	117	138
MMRS90191266ST-27-0-0	50	73	706	204	221	227	138	164	19	310	144	0	29	128	61	276	610	423	336	156	388	456	352	244	376	414	578	379	183	503	134	172	820	2860	2079	36078	90	154	206	274	108	183	88	231	350	154	267	229	79
MMRS91297590ST-27-0-0	30	61	550	34	76	31	15	68	15	61	36	0	48	15	44	38	475	608	210	46	479	233	168	161	197	279	288	171	0	126	29	62	135	544	1007	421	33	16	21	88	17	18	25	69	127	40	60	50	62
MMRS92544445ST-27-0-0	14	71	297	40	85	55	50	44	57	227	62	0	11	42	29	144	367	415	156	172	109	205	139	143	52	89	217	111	0	107	41	59	357	607	1134	762	64	60	97	101	38	19	72	89	71	75	156	48	17
MMRS92546335ST-27-0-0	0	75	152	74	16	10	4	94	4	28	80	0	6	43	14	106	179	336	52	55	61	105	78	148	30	60	106	66	30	98	44	58	217	424	415	167	30	27	34	91	9	33	20	39	51	53	155	54	0
MMRS93508324ST-27-0-0	118	208	643	289	129	93	68	7	9	192	175	158	76	187	86	237	705	608	447	110	350	215	191	316	249	250	411	217	119	317	77	167	378	1991	2105	1464	80	144	163	278	104	156	66	186	220	187	178	103	158
MMRS93621581ST-27-0-0	197	191	1152	219	155	197	128	60	61	134	208	465	40	178	134	192	1030	1042	417	221	1066	547	530	523	675	626	869	296	86	588	206	137	672	2184	3421	1871	139	186	245	342	136	40	170	277	273	166	337	196	114
MMRS94549160ST-27-0-0	69	143	1214	203	117	180	90	4	11	317	152	202	45	135	110	181	836	915	573	105	1229	660	532	647	523	632	325	411	58	406	204	138	498	1698	1446	1173	111	182	214	275	179	142	53	202	179	182	263	146	24
MMRS95277876ST-27-0-0	62	60	854	135	197	39	50	0	6	248	59	0	75	59	77	190	491	368	249	163	842	410	786	457	463	595	318	290	257	285	100	83	449	1579	1922	19934	109	89	79	278	139	79	67	100	172	103	169	64	14
MMRS95479054ST-27-0-0	30	114	832	165	176	156	124	53	49	238	123	0	65	149	101	267	933	980	367	88	494	414	303	436	364	276	551	195	237	491	155	156	566	2124	1817	28878	199	158	212	348	102	104	54	178	227	195	328	130	75
MMRS95674036ST-27-0-0	0	6	144	25	85	37	53	0	13	130	45	0	7	16	34	46	145	158	80	27	44	21	41	16	23	22	218	86	0	72	158	25	110	545	616	154379	21	29	96	65	5	2	37	66	29	53	48	34	57
MMRS96422329ST-27-0-0	0	256	620	83	43	68	127	4	15	64	84	106	34	20	30	133	507	479	235	86	1327	289	684	356	113	534	301	144	165	205	108	67	275	736	866	653	38	51	130	190	51	70	65	93	101	67	183	91	74
MMRS97052561ST-27-0-0	0	110	306	92	136	64	86	62	42	382	268	143	39	193	98	298	603	320	171	124	120	189	109	94	88	41	792	455	517	857	118	215	501	2147	1618	879	115	185	92	286	46	51	182	420	218	205	420	161	105
MMRS97307143ST-27-0-0	5	66	132	171	314	474	319	122	12	331	389	295	50	233	251	118	751	314	148	90	80	105	25	79	21	31	946	450	114	346	239	408	777	3936	1622	1861	390	174	365	263	130	156	86	237	248	172	248	208	69
MMRS97327636ST-27-0-0	4	104	611	87	46	119	92	0	241	227	134	0	48	148	69	163	781	623	309	266	303	413	297	166	414	290	505	88	386	307	147	137	369	958	1703	769	66	86	77	250	17	71	88	305	235	116	126	63	48
MMRS99045180ST-27-0-0	0	43	211	56	405	37	116	20	16	173	69	0	52	33	48	25	481	298	263	180	192	101	56	49	77	41	188	59	47	114	42	59	138	653	720	385	52	195	18	222	10	29	18	55	55	45	309	37	47
1_FDSW202414413-1b	0	0	189	91	220	144	0	0	0	239	0	0	151	182	0	139	309	404	182	62	0	0	0	0	0	0	427	195	0	270	0	0	113	1633	16755	943	0	96	0	264	0	0	0	0	0	0	140	0	0
5_FDSW202414417-1b	0	118	412	123	931	85	500	0	0	748	130	0	0	187	339	184	633	407	177	139	174	179	64	306	72	85	1358	281	0	227	227	89	792	2624	2560	3349	120	133	333	271	56	0	0	161	202	134	178	147	0
8_FDSW202414420-1b	0	0	280	0	0	0	0	0	0	0	0	0	0	365	0	0	58	193	96	0	201	698	0	0	0	0	139	0	0	0	0	0	97	416	190	86	0	56	0	126	0	0	0	0	0	0	0	0	0
11_FDSW202414423-1b	0	75	1095	0	126	128	65	0	0	777	57	0	0	83	0	362	719	1472	337	93	1120	151	837	711	78	370	400	180	0	117	530	124	299	2812	1626	751	0	72	117	184	104	0	0	129	249	0	152	0	0
19_FDSW202414431-1b	0	104	87	0	241	0	100	0	0	0	0	0	0	253	309	581	70	204	72	0	129	111	0	0	0	0	0	76	0	0	0	0	0	331	66	384	0	0	0	0	0	0	0	0	0	0	0	0	0
29_FDSW202414441-1b	0	272	536	306	500	236	71	0	0	0	193	0	0	211	0	143	725	707	344	131	411	308	679	689	232	461	565	298	0	318	305	697	595	2134	15019	2663	362	132	135	685	222	0	234	412	441	185	626	124	0
32_FDSW202414444-1b	0	0	575	0	158	83	79	0	0	158	0	0	0	77	0	89	653	418	183	0	137	75	162	117	0	182	241	181	0	162	73	96	193	983	13260	3788	0	134	0	247	0	0	0	82	77	69	130	96	0
38_FDSW202414450-1b	0	137	623	210	300	107	70	0	0	579	216	0	0	96	0	200	738	645	205	0	289	332	241	176	103	235	897	566	0	321	377	145	849	2793	2068	1066	229	186	481	487	174	0	0	398	349	222	317	276	0
43_FDSW202414455-1b	0	0	4816	0	0	0	0	0	0	1515	115	0	0	0	0	694	455	1521	502	253	629	73	667	338	798	611	80	81	0	101	0	88	116	947	1407	2909	0	368	0	125	0	0	0	0	0	0	0	196	0
45_FDSW202414457-1b	0	103	620	541	252	279	200	0	0	899	324	0	235	93	0	369	1153	657	335	362	443	546	66	566	252	161	1102	379	0	601	239	323	1035	4168	2995	1138	269	318	176	552	960	0	489	520	1070	491	418	118	0
[truncated: 5,000 more columns]

## Sheet: example_test_metadata
Run	Group	Gender	Age	BMI	Cohort
MMRS11288076ST-27-0-0	CTR	M	65	23.5	USA
MMRS11932626ST-27-0-0	CTR	M	65	29.6	USA
MMRS12272136ST-27-0-0	CRC	M	51	25.8	USA
MMRS14379078ST-27-0-0	CRC	M	53	25	USA
MMRS14602194ST-27-0-0	CRC	F	84		USA
MMRS15137911ST-27-0-0	CRC	F	64	35.7	USA
MMRS16644320ST-27-0-0	CRC	M	53	27.9	USA
MMRS17603756ST-27-0-0	CTR	F	63	16.8	USA
MMRS17963147ST-27-0-0	CTR	M	69	24.1	USA
MMRS18295921ST-27-0-0	CRC	M	42	22	USA
MMRS20257302ST-27-0-0	CTR	F	62	20.7	USA
MMRS21365932ST-27-0-0	CTR	M	56	23	USA
MMRS24340226ST-27-0-0	CRC	M	70	25.1	USA
MMRS25211151ST-27-0-0	CTR	F	60	20.5	USA
MMRS25641480ST-27-0-0	CRC	F	54	23.5	USA
MMRS29805707ST-27-0-0	CTR	M	49	33.4	USA
MMRS31306426ST-27-0-0	CRC	M	73	25.8	USA
MMRS32573774ST-27-0-0	CTR	M	82	20.5	USA
MMRS33294861ST-27-0-0	CTR	M	48	23.1	USA
MMRS34525504ST-27-0-0	CRC	M	71	24.7	USA
MMRS34569532ST-27-0-0	CTR	M	72	23.1	USA
MMRS35808664ST-27-0-0	CTR	M	63	31.6	USA
MMRS36405092ST-27-0-0	CTR	M	48	26.4	USA
MMRS38861560ST-27-0-0	CTR	F	76	22.1	USA
MMRS38954404ST-27-0-0	CTR	F	55	23.8	USA
MMRS39415781ST-27-0-0	CTR	F	70	28.6	USA
MMRS39582183ST-27-0-0	CTR	M	39	23.5	USA
MMRS40913371ST-27-0-0	CTR	F	76	26.9	USA
MMRS41266697ST-27-0-0	CRC	F	54	24	USA
MMRS41711735ST-27-0-0	CRC	M	58	21.1	USA
MMRS42780924ST-27-0-0	CRC	M	65	31.4	USA
MMRS43563715ST-27-0-0	CRC	M	71	22.6	USA
MMRS43939546ST-27-0-0	CRC	F	63	25.7	USA
MMRS44197125ST-27-0-0	CRC	M	40	17.4	USA
MMRS44203591ST-27-0-0	CRC	F	59	20.4	USA
MMRS44587603ST-27-0-0	CRC	F	66	31.5	USA
MMRS47662059ST-27-0-0	CRC	M	74	23.6	USA
MMRS47685461ST-27-0-0	CRC	M	67	33.2	USA
MMRS51307502ST-27-0-0	CTR	F	45	22.6	USA
MMRS51410669ST-27-0-0	CRC	M	65	21.1	USA
MMRS51728985ST-27-0-0	CRC	M	61	24.4	USA
MMRS51737257ST-27-0-0	CTR	M	63	25.4	USA
MMRS54246132ST-27-0-0	CTR	M	63	24	USA
MMRS54316675ST-27-0-0	CRC	M	55	29.6	USA
MMRS55294627ST-27-0-0	CRC	M	43	32	USA
MMRS56137463ST-27-0-0	CTR	M	51	24.8	USA
MMRS57276462ST-27-0-0	CTR	M	67	30.5	USA
MMRS57569834ST-27-0-0	CTR	M	58	24.5	USA
MMRS59699117ST-27-0-0	CRC	M	85	22.8	USA
MMRS61683006ST-27-0-0	CTR	F	62	25.8	USA
MMRS62192467ST-27-0-0	CTR	F	70	31.2	USA
MMRS62376181ST-27-0-0	CRC	F	69	20.8	USA
MMRS62666492ST-27-0-0	CTR	M	60	33.4	USA
MMRS64281211ST-27-0-0	CRC	M	71	27.8	USA
MMRS64281551ST-27-0-0	CTR	F	63	28.3	USA
MMRS65205033ST-27-0-0	CRC	F	89	22.7	USA
MMRS65742083ST-27-0-0	CTR	M	63	24.8	USA
MMRS65862658ST-27-0-0	CTR	M	72	23.6	USA
MMRS65945127ST-27-0-0	CRC	M	65	32.1	USA
MMRS66868025ST-27-0-0	CTR	M	58	26.8	USA
MMRS67096717ST-27-0-0	CTR	M	79	35.2	USA
MMRS67247116ST-27-0-0	CRC	M	53	25.4	USA
MMRS68630931ST-27-0-0	CTR	M	59	23.6	USA
MMRS68910755ST-27-0-0	CRC	F	83	16.8	USA
MMRS71762412ST-27-0-0	CRC	M	44	23.4	USA
MMRS72802364ST-27-0-0	CRC	M	74		USA
MMRS72980899ST-27-0-0	CRC	M	63	21.3	USA
MMRS73787048ST-27-0-0	CTR	M	47	24.4	USA
MMRS77018926ST-27-0-0	CRC	M	40	23.7	USA
MMRS77321055ST-27-0-0	CRC	M	31	19.6	USA
MMRS77487595ST-27-0-0	CRC	M	78	22.6	USA
MMRS78791111ST-27-0-0	CRC	M	65	24.3	USA
MMRS79893829ST-27-0-0	CTR	M	66	28.2	USA
MMRS80093644ST-27-0-0	CRC	M	31	19.6	USA
MMRS81130264ST-27-0-0	CTR	M	64	32.4	USA
MMRS81135225ST-27-0-0	CTR	M	57	25.1	USA
MMRS81194191ST-27-0-0	CRC	M	54	18.6	USA
MMRS81671217ST-27-0-0	CRC	M	57	26.4	USA
MMRS84085284ST-27-0-0	CTR	M	68	22.1	USA
MMRS84159866ST-27-0-0	CTR	F	67	18.6	USA
MMRS84954772ST-27-0-0	CRC	M	56	25.8	USA
MMRS85382779ST-27-0-0	CRC	M	66	21.6	USA
MMRS85438660ST-27-0-0	CTR	M	68	23	USA
MMRS85548821ST-27-0-0	CTR	M	71	23.2	USA
MMRS86168210ST-27-0-0	CTR	M	79	21.3	USA
MMRS86178473ST-27-0-0	CRC	M	65	25.1	USA
MMRS86958796ST-27-0-0	CRC	F	55	31.6	USA
MMRS87723283ST-27-0-0	CTR	M	42	27.6	USA
MMRS88581325ST-27-0-0	CTR	F	73	23.9	USA
MMRS90191266ST-27-0-0	CRC	M	37	22.5	USA
MMRS91297590ST-27-0-0	CTR	M	36	21.3	USA
MMRS92544445ST-27-0-0	CRC	F	72	27.8	USA
MMRS92546335ST-27-0-0	CTR	F	42	27.2	USA
MMRS93508324ST-27-0-0	CRC	F	71		USA
MMRS93621581ST-27-0-0	CTR	M	60	23.1	USA
MMRS94549160ST-27-0-0	CTR	M	76	23.8	USA
MMRS95277876ST-27-0-0	CTR	M	48	21.5	USA
MMRS95479054ST-27-0-0	CTR	M	45	24.4	USA
MMRS95674036ST-27-0-0	CTR	F	68	38.4	USA
MMRS96422329ST-27-0-0	CRC	M	66	22.3	USA
MMRS97052561ST-27-0-0	CRC	F	69	27.8	USA
MMRS97307143ST-27-0-0	CTR	M	56	22.7	USA
MMRS97327636ST-27-0-0	CRC	M	84	23.5	USA
MMRS99045180ST-27-0-0	CRC	F	67	30	USA
1_FDSW202414413-1b	CRC	F	47	28.556	CHISH
5_FDSW202414417-1b	CRC	F	47	28.556	CHISH
8_FDSW202414420-1b	CRC	M	51	24.802	CHISH
11_FDSW202414423-1b	CRC	M	47	28.685	CHISH
19_FDSW202414431-1b	CRC	F	67	22.719	CHISH
29_FDSW202414441-1b	CRC	F	68	29.643	CHISH
32_FDSW202414444-1b	CRC	F	68	30.359	CHISH
38_FDSW202414450-1b	CRC	F	46	18.314	CHISH
43_FDSW202414455-1b	CRC	F	62	21.641	CHISH
45_FDSW202414457-1b	CRC	M	66	18.778	CHISH

## Sheet: example_other_abundance
	'Catharanthus roseus' aster yellows phytoplasma	Acaryochloris marina	Acetoanaerobium sticklandii	Acetobacter aceti	Acetobacter ascendens	Acetobacter ghanensis	Acetobacter orientalis	Acetobacter oryzifermentans	Acetobacter oryzoeni	Acetobacter pasteurianus	Acetobacter persici	Acetobacter pomorum	Acetobacter senegalensis	Acetobacter sp. KACC 21233	Acetobacter tropicalis	Acetobacteraceae bacterium	Acetobacterium sp. KB-1	Acetobacterium woodii	Acetohalobium arabaticum	Acetomicrobium mobile	Acholeplasma axanthum	Acholeplasma brassicae	Acholeplasma hippikon	Acholeplasma laidlawii	Acholeplasma oculi	Acholeplasma palmae	Achromobacter denitrificans	Achromobacter insolitus	Achromobacter ruhlandii	Achromobacter sp. AONIH1	Achromobacter sp. B7	Achromobacter sp. MFA1 R4	Achromobacter spanius	Achromobacter xylosoxidans	Acidaminococcus fermentans	Acidaminococcus intestini	Acidibrevibacterium fodinaquatile	Acidiferrobacter sp. SPIII_3	Acidihalobacter ferrooxidans	Acidihalobacter prosperus	Acidimicrobium ferrooxidans	Acidiphilium cryptum	Acidiphilium multivorum	Acidipropionibacterium acidipropionici	Acidipropionibacterium jensenii	Acidipropionibacterium virtanenii	Acidisarcina polymorpha	Acidithiobacillus caldus	Acidithiobacillus ferridurans
DC_02	0	166	783	170	247	82	71	0	221	294	237	0	0	129	0	199	490	615	202	79	170	115	131	223	183	200	682	313	0	373	146	205	412	1731	110772	5194	212	231	139	335	109	0	0	235	247	156	375	98	0
PD_17	0	87	751	151	163	152	102	0	0	368	112	0	0	82	0	148	664	728	582	190	1734	800	891	640	811	797	335	219	0	518	145	69	705	1619	1528	754	185	125	148	175	0	0	0	269	251	221	257	139	0
PD_22	0	134	1068	89	381	113	127	0	0	350	104	0	0	149	0	184	847	960	367	114	529	356	281	403	374	614	399	201	0	326	158	94	450	943	1277	858	138	90	172	273	0	0	0	223	176	110	356	156	0
DC_12	0	0	59	108	206	92	0	0	0	0	152	0	0	117	0	0	172	161	0	0	0	0	0	0	0	0	593	283	0	511	168	203	559	2243	1720	521	203	127	131	160	67	0	0	302	383	178	137	184	0
PD_21	0	68	555	137	183	122	0	0	0	254	107	0	0	79	0	509	1098	1023	312	134	326	288	744	280	371	170	425	127	0	127	80	131	221	1433	1122	975	110	66	75	357	63	203	0	200	90	73	112	0	0
CO_03	0	110	441	164	160	76	83	0	0	227	122	0	0	106	0	107	705	500	306	92	369	263	250	218	357	801	552	184	0	387	133	142	559	1908	1386	730	195	106	269	273	80	220	0	203	117	124	243	113	143
PD_20	0	137	354	207	211	132	154	0	0	332	243	0	149	235	232	62	585	437	157	198	268	185	172	86	244	138	1499	472	0	1528	235	464	1129	4944	2727	1247	398	233	386	503	177	230	219	654	568	445	355	279	0
PD_01	0	210	1301	419	134	133	112	0	0	436	113	0	121	188	0	321	952	676	755	491	2301	969	1658	1368	1093	1174	1118	304	0	776	293	324	818	3053	2270	2420	160	349	187	671	188	0	323	236	548	442	359	218	0
DC_14	0	83	0	60	0	0	0	0	0	0	85	0	196	0	0	0	79	142	0	0	0	121	0	90	0	0	0	0	0	0	0	0	152	441	632	586	0	0	106	70	0	0	0	0	0	0	0	0	0
PD_11	0	73	376	293	457	180	133	0	0	196	386	0	0	92	401	637	678	486	344	372	240	464	146	300	223	150	466	291	0	531	146	161	622	1065	3389	924	168	156	199	243	0	0	312	188	190	139	227	198	0
PD_36	0	71	650	172	0	67	0	0	0	231	140	0	0	140	0	86	439	1134	170	56	394	152	276	199	114	329	343	212	0	277	200	213	401	1297	2663	935	148	79	159	202	0	0	0	210	249	138	331	60	0
DC_06	0	80	250	100	0	157	0	0	0	0	0	0	0	0	0	65	332	314	183	0	84	129	113	83	0	0	346	128	0	206	182	91	311	1176	1087	890	0	57	80	163	0	0	0	151	0	81	0	0	0
PD_38	0	0	266	152	127	0	58	0	0	300	120	0	0	164	114	64	416	254	109	111	125	89	87	66	99	0	715	248	0	289	179	140	562	2339	1177	484	213	188	108	251	83	0	0	199	209	174	179	86	0
PD_28	0	176	186	172	180	202	310	0	0	446	332	0	158	282	127	123	650	421	118	159	0	120	102	110	0	0	1577	502	0	1091	413	380	885	4570	2991	1016	280	363	249	729	114	0	314	707	757	473	358	277	0
DC_15	0	68	486	146	286	143	0	0	0	227	125	0	0	145	0	188	593	466	453	225	632	438	468	462	369	498	469	239	0	247	141	133	590	1293	1781	15139	209	89	181	185	81	0	0	203	155	171	256	122	0
CO_11	0	74	520	121	0	164	0	0	0	0	260	0	0	188	0	123	305	283	85	96	0	109	66	259	91	0	270	173	0	304	0	462	383	2048	1588	933	78	104	116	478	0	0	0	160	176	111	183	124	0
CO_07	0	130	279	103	113	69	0	0	0	179	110	0	0	0	0	152	287	276	86	126	150	313	68	161	82	96	291	179	0	203	89	95	412	1134	2173	138051	92	71	110	145	0	0	0	110	126	145	109	0	0
PD_30	0	58	280	222	457	84	0	0	0	677	212	0	563	249	0	98	601	385	141	229	292	174	164	119	251	349	2732	1075	0	2255	480	630	1975	10918	3418	1263	818	434	283	702	264	448	1261	1305	1369	612	272	520	0
PD_42	0	122	481	309	149	76	148	0	0	681	315	0	0	103	195	265	750	439	229	66	448	292	173	219	191	280	401	310	0	473	111	176	468	1706	1458	966	274	170	326	171	0	0	0	171	209	155	138	72	0
PD_16	0	191	991	340	147	165	62	0	0	753	214	0	0	169	0	481	1252	774	255	419	774	503	426	674	643	387	1603	347	0	1044	246	474	1250	4475	3215	999	196	204	281	750	220	0	0	458	501	651	334	260	0
DC_04	0	3189	591	168	222	97	0	0	0	238	91	0	216	142	0	362	839	520	200	150	440	378	443	658	468	292	500	116	0	355	116	432	304	1393	3857	2433	0	223	65	397	0	0	322	157	124	134	327	117	0
CO_12	0	0	503	0	148	0	0	0	0	0	0	0	0	0	0	90	589	529	205	0	223	0	126	203	212	99	213	88	0	0	0	0	0	226	616	457	0	0	0	0	0	0	0	0	0	0	78	0	0
DC_01	0	111	288	0	147	138	0	0	0	180	0	0	95	0	0	0	435	600	189	85	175	278	103	96	242	318	290	83	0	176	0	99	513	746	857	621	0	57	64	153	0	0	0	71	0	0	107	0	0
PD_03	0	92	563	283	133	139	85	0	0	393	80	0	229	70	0	291	850	624	270	260	468	588	548	341	434	725	735	188	0	430	92	68	738	1276	1375	714	249	77	171	152	116	0	0	116	209	181	211	182	0
DC_10	0	0	155	0	0	0	0	0	0	0	0	0	0	0	0	0	271	245	70	0	0	0	0	0	0	0	288	214	0	352	0	240	359	829	735	254	0	62	187	129	0	0	0	107	179	80	0	0	0
PD_15	0	139	635	665	199	156	184	0	0	160	435	1096	0	108	139	401	700	828	233	191	768	643	513	490	602	440	604	278	0	313	326	372	602	1682	1721	1065	179	98	405	302	82	0	0	273	264	142	216	122	0
PD_07	0	163	672	180	176	164	120	0	0	364	180	0	243	199	0	156	801	620	443	129	928	419	479	596	415	578	810	276	0	536	156	250	562	2293	4089	976	212	203	118	235	114	0	0	350	201	162	298	168	0
DC_07	0	244	504	219	101	139	0	0	0	352	322	0	0	280	200	284	1094	617	331	277	680	256	305	492	218	165	839	238	0	511	119	177	593	2221	2719	1145	146	212	149	391	135	0	0	498	380	309	609	130	0
DC_03	0	209	1059	352	205	150	77	0	0	290	409	0	112	272	563	234	1252	1343	676	384	735	359	452	522	719	611	1399	442	0	979	481	472	1324	3843	25426	3292	423	276	171	461	182	541	0	908	749	777	627	165	0
PD_05	0	104	848	222	241	181	114	0	0	387	190	0	0	150	185	296	775	716	359	167	772	314	503	418	373	507	325	328	0	216	164	96	267	928	1312	1282	128	158	127	342	85	0	0	198	159	135	132	148	0
DC_11	0	1204	116	121	0	67	0	0	0	0	0	0	189	0	0	56	172	191	75	71	186	91	151	82	132	112	390	67	0	185	139	0	168	444	339	223	0	112	0	248	0	0	0	0	218	0	250	84	0
PD_23	0	153	148	424	256	248	122	0	0	204	493	0	308	268	310	60	702	379	324	161	0	0	0	0	0	0	2263	1042	0	2272	383	831	2538	8648	4409	1076	709	691	650	662	331	355	698	1670	888	821	412	351	0
CO_04	0	0	96	0	0	0	0	0	0	0	0	0	0	167	0	0	75	0	0	0	0	0	0	0	65	110	131	89	0	0	0	0	141	404	924	180	0	0	0	0	0	0	0	0	0	0	0	0	0
CO_02	0	70	203	0	238	0	0	0	0	0	0	0	0	62	0	61	413	303	538	0	162	132	82	117	109	151	351	130	0	182	97	102	240	992	762	6060	0	0	92	144	0	0	0	102	88	103	117	0	0
PD_37	0	0	105	326	258	117	87	0	0	245	243	0	159	474	0	144	476	119	86	84	0	0	0	0	0	0	1160	992	0	1579	502	591	1392	6401	2919	754	656	242	345	612	138	487	0	1235	750	519	499	609	0
PD_08	0	153	983	369	437	153	86	0	0	292	147	0	0	166	0	460	908	824	245	233	562	754	297	373	447	516	786	237	0	507	142	139	594	1636	1732	5147	183	133	158	342	116	329	0	237	202	177	340	110	0
DC_09	0	0	161	0	0	0	0	0	0	266	99	0	0	73	0	0	568	259	89	99	88	249	119	73	66	66	344	260	0	156	183	112	466	1488	1299	549	98	83	94	219	127	0	0	252	249	104	112	210	0
PD_25	0	0	107	188	282	137	0	0	0	0	197	0	0	270	0	0	329	224	101	189	0	0	0	0	0	0	1432	732	0	1029	354	460	944	3222	1954	963	292	350	545	315	212	218	315	759	358	317	356	393	0
CO_01	0	79	158	83	229	0	73	0	0	165	0	0	0	92	153	83	335	426	177	181	74	89	64	0	76	110	263	77	0	0	0	100	392	877	649	730	0	0	0	319	0	0	0	0	0	105	74	69	0
CO_13	0	89	203	85	186	249	223	0	0	333	285	0	0	106	193	142	479	230	95	0	80	154	0	62	93	74	350	161	0	163	106	108	230	1046	1307	650	92	64	237	97	0	0	0	138	102	60	145	0	0
PD_02	0	148	1107	432	192	226	151	0	0	518	396	0	0	182	277	232	1406	887	447	178	785	459	442	471	797	660	1253	346	0	1136	229	307	1032	3622	2863	34901	230	219	342	416	146	0	0	603	313	303	476	224	294
PD_13	0	340	521	366	188	78	84	0	0	334	204	0	250	125	0	442	911	804	472	126	676	281	322	314	301	471	955	443	0	609	195	286	920	2527	2722	1325	191	127	187	461	207	0	0	469	568	268	231	343	0
PD_31	0	90	150	113	138	102	0	0	0	241	0	0	0	91	129	71	360	253	71	56	81	132	0	109	88	58	429	215	0	266	157	140	518	1404	30944	1596	136	99	85	243	0	0	0	113	145	96	172	91	0
CO_05	0	75	217	338	0	317	157	0	0	483	144	0	166	244	0	196	647	537	189	113	337	218	126	109	168	74	1108	410	0	313	188	165	575	1654	1817	1068	184	119	103	229	0	0	0	142	164	146	101	101	0
PD_14	0	62	488	106	189	189	219	0	0	517	160	0	0	109	0	469	1335	672	203	93	299	284	185	208	320	146	555	362	0	277	172	152	524	1141	2213	1008	92	83	179	274	0	0	0	80	102	123	180	169	0
DC_08	0	181	295	196	237	156	0	0	0	364	203	0	0	197	0	173	788	465	325	165	278	230	268	206	166	156	715	394	0	608	234	234	585	2341	2661	1516	162	204	152	323	121	0	0	428	346	286	356	206	0
PD_06	0	129	549	126	208	189	141	0	0	217	157	0	0	118	201	127	721	655	226	116	136	359	252	155	128	152	475	261	0	468	157	175	670	2021	1586	995	178	165	148	311	0	0	0	258	184	152	193	197	0
PD_18	0	423	949	286	390	118	103	0	0	564	214	0	0	202	0	313	760	698	478	164	920	424	543	719	504	673	627	232	0	526	156	249	517	2206	7601	7996	229	158	137	424	92	0	0	307	337	193	278	140	0
PD_19	0	77	167	97	132	73	0	0	0	189	63	0	0	0	0	92	449	224	116	94	0	392	65	0	0	0	624	162	0	260	117	132	359	1237	802	519	0	95	94	133	0	0	0	158	97	110	118	111	0
CO_08	226	148	339	300	163	248	102	0	0	207	138	0	0	349	257	115	967	549	199	254	935	1220	906	749	727	840	1024	367	0	1059	200	195	753	2855	3148	1302	188	233	363	418	207	0	0	448	557	396	478	315	0
PD_04	0	133	677	584	426	196	199	0	0	250	208	0	0	118	206	176	913	598	242	253	227	167	234	250	0	299	662	232	0	237	279	123	519	1353	1976	1972	156	171	245	316	160	0	178	211	254	122	333	147	0
CO_09	0	787	537	207	103	124	82	0	0	189	147	0	201	73	0	294	622	518	191	66	240	139	117	248	181	183	315	91	0	161	168	209	350	880	1305	1101	81	78	165	400	0	0	0	212	161	125	251	67	0
DC_05	0	191	1397	195	164	132	146	0	0	287	197	0	195	197	191	311	693	603	408	143	1466	452	458	690	546	622	611	301	0	473	156	269	608	2709	2599	2176	287	170	191	450	145	269	0	289	257	177	199	205	0
DC_13	0	82	273	102	282	0	0	0	0	0	121	0	0	0	0	179	442	248	97	0	79	142	0	84	127	126	223	125	0	99	0	113	189	697	547	213	101	72	84	170	0	0	0	82	85	0	176	66	0
CO_06	0	151	267	306	152	286	202	0	0	384	104	0	0	148	143	367	741	327	163	66	93	213	93	135	0	87	1010	297	0	646	208	201	745	3023	2290	1358	265	171	174	185	61	0	0	448	260	163	257	236	0
PD_26	0	104	470	290	190	136	99	0	0	304	92	0	0	148	0	279	527	490	141	228	268	248	255	163	135	222	533	214	0	244	108	116	442	1678	1470	1015	105	72	103	296	89	0	0	163	251	145	148	0	0
PD_12	0	0	342	0	178	0	0	0	0	0	87	0	0	0	0	119	461	311	121	65	71	168	0	78	90	0	243	122	0	0	71	84	196	797	9988	880196	0	0	68	125	0	0	0	73	0	0	285	0	0
CO_10	0	120	328	185	175	120	0	0	0	332	164	0	0	157	0	109	555	335	146	217	152	127	82	157	131	110	492	513	0	309	199	188	499	1538	2908	1581	204	150	132	255	60	0	0	311	402	222	195	139	0
PD_41	0	107	219	336	379	1046	750	687	0	549	831	0	0	59	186	623	1064	379	155	62	100	166	84	89	93	93	590	259	0	363	327	406	525	2102	1286	804	145	109	294	153	0	0	0	133	178	95	251	81	0
ERR260193	0	61	355	206	0	0	0	0	0	0	0	0	0	0	0	127	364	373	116	97	221	251	83	134	82	101	263	0	0	0	0	0	166	775	651	435	81	0	81	99	0	0	0	92	0	0	122	0	0
ERR260204	0	56	332	0	0	86	0	0	0	216	61	0	0	0	0	172	426	432	146	127	196	277	127	149	190	226	193	0	0	0	0	0	183	500	632	464	0	0	64	96	0	0	0	94	91	78	135	0	0
ERR260209	0	177	812	0	0	0	0	0	0	0	0	0	0	0	0	113	438	309	290	82	1082	463	484	330	334	441	133	0	0	0	0	0	114	478	652	327	106	63	0	91	57	0	0	0	0	0	92	0	0
ERR260224	0	83	446	122	0	0	0	0	0	0	174	0	0	0	0	110	469	458	165	60	276	219	148	229	121	229	145	71	0	0	0	0	186	589	1329	519	67	0	0	75	0	0	0	94	0	0	0	0	0
ERR260225	0	0	265	0	0	0	0	0	0	0	0	0	0	0	0	69	238	209	97	0	148	225	91	101	107	104	201	86	0	0	0	0	153	694	560	833	106	0	0	0	0	0	0	95	0	0	72	0	0
ERR260226	0	64	551	154	0	0	116	0	0	0	115	0	0	119	0	76	455	418	349	101	467	331	270	316	263	409	322	88	0	261	0	0	257	823	794	396	0	61	0	119	0	0	0	107	104	0	136	0	0
ERR260227	0	0	214	0	0	0	0	0	0	0	0	0	0	0	0	63	279	317	107	0	89	86	79	0	0	60	0	0	0	0	0	0	0	267	329	196	0	0	0	0	0	0	0	0	0	0	0	0	0
ERR260250	0	70	263	0	0	89	0	0	0	238	98	0	0	0	0	139	367	310	186	90	309	223	173	158	198	201	244	79	0	0	68	0	129	557	696	470	60	61	58	130	0	0	0	83	138	83	0	0	0
ERR260251	0	0	313	0	0	0	0	0	0	0	0	0	0	0	0	0	524	352	132	0	156	235	113	111	186	144	173	0	0	0	0	0	129	552	497	361	0	0	0	0	0	0	0	0	0	0	97	0	0
ERR260252	0	96	550	73	0	85	0	0	0	262	85	0	0	68	0	144	644	413	306	131	483	197	213	210	167	147	266	111	0	0	75	90	185	927	1035	586	86	122	143	136	0	0	0	143	125	0	123	110	0
ERR260253	0	91	396	61	0	0	0	0	0	0	94	0	0	0	218	87	487	428	270	0	472	182	212	207	314	256	179	0	0	231	98	0	164	537	1009	406	0	0	0	97	0	0	0	0	0	86	0	0	0
ERR260268	0	0	96	0	0	0	0	0	0	0	0	0	0	0	0	0	119	92	0	0	0	0	0	0	0	0	0	0	0	0	0	0	0	450	203	114	0	0	0	0	0	0	0	0	0	0	0	0	0
ERR260255	0	0	241	0	0	0	0	0	0	0	0	0	0	0	0	67	298	306	107	0	133	196	87	85	70	57	0	0	0	0	0	0	114	361	409	3678	0	0	0	0	0	0	0	0	0	0	0	0	0
ERR260256	0	0	396	169	0	0	0	0	0	0	0	0	0	0	0	96	502	327	173	0	301	186	220	193	152	170	132	0	0	0	0	0	114	446	526	448	0	0	0	114	0	0	0	0	126	0	69	0	0
ERR260258	0	62	889	0	0	0	0	0	0	0	0	0	0	0	0	124	308	431	135	69	527	337	155	82	112	305	136	0	0	0	0	0	107	272	552	233	0	0	0	73	0	0	0	0	0	0	0	0	0
ERR260259	0	101	402	76	268	0	0	0	0	0	0	0	0	140	0	105	423	469	220	0	281	246	119	186	191	152	207	101	0	220	0	0	255	1169	775	579	104	0	101	91	0	0	0	78	156	0	0	76	0
ERR260260	0	76	434	218	0	0	0	0	0	0	147	0	0	0	0	95	389	317	313	0	162	138	212	180	162	126	254	161	0	191	92	90	206	954	840	544	119	117	65	106	73	0	0	165	90	71	111	0	0
ERR260261	0	61	221	0	0	0	0	0	0	0	0	0	0	0	0	72	367	307	127	0	69	105	76	87	0	66	181	0	0	168	0	0	152	640	707	673	0	0	0	168	0	0	0	158	118	0	80	0	0
ERR260263	0	71	554	137	223	122	0	0	0	211	123	0	0	0	0	100	582	611	202	101	233	264	197	122	239	247	575	127	0	341	109	0	392	1322	1186	16177	117	98	89	117	78	0	0	137	172	136	179	89	0
ERR260264	0	150	433	135	128	93	0	0	0	275	135	0	0	159	0	114	645	415	382	421	305	158	356	197	154	165	625	189	0	650	140	111	637	2077	1453	942	143	204	175	339	155	0	0	245	171	199	175	193	0
ERR260265	0	78	371	246	0	0	0	0	0	0	0	0	0	0	0	101	477	421	384	77	303	119	166	167	237	212	261	116	0	123	109	77	241	820	1049	598	97	68	82	78	0	0	0	131	123	69	99	0	0
ERR260266	0	0	653	97	305	64	0	0	0	0	129	0	0	0	0	0	472	605	198	0	227	156	106	99	177	167	229	82	0	194	69	0	262	980	918	622	58	61	76	114	0	0	0	160	91	92	126	0	0
ERR260267	0	0	333	108	339	0	0	0	0	0	104	0	0	97	0	132	493	347	115	56	135	282	210	145	151	72	512	139	0	193	66	89	293	909	1216	749	130	69	92	163	0	0	0	149	160	155	173	0	0
ERR260229	0	0	131	0	0	0	0	0	0	0	0	0	0	0	0	0	187	307	145	0	73	128	0	0	150	175	0	0	0	0	0	0	0	188	362	307	0	0	0	0	0	0	0	0	0	0	122	0	0
ERR260230	0	0	362	0	0	0	0	0	0	0	0	0	0	0	0	0	290	259	145	0	220	108	113	137	135	147	112	0	0	0	0	0	103	326	314	231	0	0	0	0	0	0	0	0	0	0	0	0	0
ERR260231	0	0	236	0	0	0	0	0	0	0	0	0	0	0	0	69	256	250	157	0	126	158	57	87	0	145	0	0	0	0	0	0	95	559	403	270	0	0	0	83	0	0	0	99	0	0	0	0	0
ERR260234	0	0	214	0	0	0	0	0	0	0	0	0	0	0	0	61	291	216	111	0	168	208	107	114	109	66	143	0	0	82	0	0	113	379	471	254	94	0	0	88	0	0	0	116	0	65	71	0	0
ERR260235	0	0	80	0	0	0	0	0	0	153	0	0	0	0	0	0	279	239	0	0	0	306	0	0	0	0	0	0	0	0	0	0	0	273	364	27772	0	0	0	0	0	0	0	0	0	0	0	0	0
ERR260238	0	0	205	0	0	0	0	0	0	0	0	0	0	0	0	0	230	257	77	0	83	61	75	73	0	0	0	0	0	0	0	0	0	0	298	249	0	0	0	0	0	0	0	0	0	0	0	0	0
ERR260239	0	0	158	92	0	0	0	0	0	0	138	0	0	0	0	0	210	337	66	0	79	231	99	74	73	85	137	0	0	0	0	0	136	368	675	331	79	0	0	92	0	0	0	0	0	0	67	0	0
ERR260240	0	72	244	0	0	0	0	0	0	0	219	0	0	0	0	73	390	438	146	0	58	259	70	0	67	0	140	89	0	0	0	0	139	365	744	533	0	0	0	64	0	0	0	123	0	0	84	0	0
ERR260241	0	0	184	0	0	0	0	0	0	0	0	0	0	254	0	159	351	261	121	75	121	190	102	161	66	0	173	177	0	312	0	113	275	884	693	572	0	0	62	121	0	0	0	150	101	0	0	0	0
ERR260242	0	0	329	0	0	0	0	0	0	0	0	0	0	0	0	70	199	280	95	62	254	220	129	130	126	134	184	77	0	0	0	0	198	567	569	333	63	0	0	98	0	0	0	74	79	0	99	0	0
ERR260243	0	0	293	0	0	0	0	0	0	0	0	0	0	0	0	104	349	237	106	0	194	205	176	86	69	189	198	0	0	0	0	0	124	368	466	283	60	0	0	0	0	0	0	0	95	0	0	0	0
ERR260244	0	0	173	0	0	0	0	0	0	0	179	0	0	0	0	63	332	387	121	0	107	153	82	0	66	0	0	0	0	0	0	0	117	411	577	451	0	0	0	112	0	0	0	0	0	0	0	0	0
ERR260270	0	0	0	0	0	0	0	0	0	0	0	0	0	0	0	0	103	77	0	0	0	0	0	0	0	0	0	0	0	0	0	0	0	0	156	118	0	0	0	0	0	0	0	0	0	0	0	0	0
ERR260246	0	0	160	0	0	0	0	0	0	0	0	0	0	0	0	0	260	317	122	0	105	0	75	0	0	0	0	0	0	0	0	0	0	426	550	316	0	0	0	0	0	0	0	0	0	0	0	0	0
ERR260271	0	0	79	0	0	0	0	0	0	0	0	0	0	0	0	0	107	105	0	0	71	0	0	0	0	106	0	0	0	0	0	0	0	0	162	101	0	0	0	0	0	0	0	0	0	0	0	0	0
ERR260139	0	72	202	0	0	0	0	0	0	0	0	0	0	0	0	0	313	268	90	58	76	117	71	0	89	89	0	0	0	0	0	0	102	435	322	241	0	0	0	75	0	0	0	0	0	58	0	0	0
ERR260140	0	0	129	0	0	0	0	0	0	0	0	0	0	0	0	72	205	357	78	0	118	129	84	0	0	85	0	0	0	0	0	0	0	260	357	272	0	0	0	0	0	0	0	0	0	0	79	0	0
ERR260144	0	60	720	147	0	0	0	0	0	0	152	0	0	0	0	0	418	363	208	0	574	274	308	313	316	467	144	0	0	155	0	0	94	542	510	491	0	0	0	81	0	0	0	93	0	0	0	119	0
ERR260147	0	0	304	181	0	0	0	0	0	0	0	0	0	0	0	0	307	223	200	0	289	80	182	150	102	139	138	71	0	115	0	0	158	378	662	313	73	0	0	94	67	0	0	97	84	0	68	0	0
ERR260149	0	74	184	95	237	0	0	0	0	0	0	0	0	76	0	75	546	263	254	0	215	234	87	56	165	71	113	92	0	0	0	0	124	514	478	435	142	0	0	99	0	0	0	95	0	0	67	0	0
ERR260151	0	0	618	247	0	0	0	0	0	0	0	0	0	0	0	133	350	484	253	86	513	165	238	264	268	343	149	0	0	0	85	0	157	593	801	504	62	0	78	120	0	0	0	109	98	0	89	0	0
ERR260152	0	0	256	149	0	0	0	0	0	0	0	0	0	0	0	83	372	276	114	0	90	143	62	86	148	88	0	0	0	0	0	0	0	464	393	292	0	0	0	102	0	0	0	0	0	0	0	0	0
ERR260153	0	65	444	0	0	0	0	0	0	0	138	0	0	0	0	103	337	294	121	111	258	203	103	271	126	224	118	0	0	0	0	0	116	434	719	372	59	0	0	122	0	0	0	0	78	0	68	0	0
ERR260155	0	69	515	0	0	0	0	0	0	0	174	0	0	0	0	0	336	473	160	0	545	230	199	180	161	289	113	0	0	0	0	0	84	352	516	608	0	0	0	96	0	0	0	0	0	0	0	0	0
ERR260159	0	0	123	0	0	0	0	0	0	0	0	0	0	0	0	0	284	246	60	0	68	145	0	79	0	0	177	0	0	0	0	0	109	560	494	421	102	0	0	0	0	0	0	0	0	0	0	0	0
ERR260161	0	0	323	0	0	0	0	0	0	363	0	0	0	0	0	97	861	547	184	0	118	195	154	96	85	94	180	0	0	0	0	0	168	665	1546	3697	0	0	0	132	0	0	0	85	0	68	61	0	0
ERR260162	0	161	625	114	294	97	0	0	0	184	161	0	0	88	157	92	631	670	335	81	300	309	203	146	343	203	424	146	0	179	91	90	370	867	1223	735	101	87	107	177	0	0	0	176	202	106	149	176	0
ERR260163	0	102	420	64	238	0	0	0	0	0	74	0	0	0	0	100	537	370	208	56	380	268	241	164	260	298	274	166	0	318	0	80	282	1038	1296	552	80	58	94	108	0	0	0	175	135	86	109	112	0
ERR260165	0	75	462	82	131	0	0	0	0	246	114	0	0	0	0	106	695	632	215	77	231	406	120	160	125	152	361	94	0	171	0	74	257	964	1025	762	150	0	81	168	0	0	0	115	0	67	131	0	0
ERR260166	0	78	629	182	0	0	0	0	0	0	142	0	0	178	0	97	493	403	161	71	342	224	197	347	176	233	489	227	0	368	88	111	425	1676	837	470	145	173	88	139	87	0	0	217	166	92	146	93	0
ERR260167	0	0	211	0	0	0	0	0	0	193	58	0	0	0	0	0	444	461	139	141	59	0	0	0	117	0	155	69	0	0	0	0	129	439	588	372	0	0	0	77	0	0	0	89	0	0	0	0	0
ERR260169	0	0	161	168	0	0	0	0	0	0	0	0	0	0	0	0	215	285	141	0	88	93	62	60	87	114	0	0	0	0	0	0	134	712	373	408	0	0	0	0	0	0	0	0	0	0	80	0	0
ERR260170	0	85	252	0	0	0	0	0	0	191	0	0	0	0	0	0	250	281	107	87	87	210	87	66	0	0	227	144	0	161	0	0	183	931	533	299	62	73	84	122	57	0	0	134	84	82	98	166	0
ERR260171	0	97	405	312	147	205	102	0	0	222	123	0	0	112	228	206	786	583	154	106	157	477	182	155	169	158	530	461	1365	703	112	183	495	2644	2436	1423	311	197	215	353	129	0	0	687	248	265	340	124	0
ERR260173	0	150	868	196	105	159	72	0	0	438	151	0	168	106	0	470	1021	863	450	261	832	375	207	425	344	621	675	286	0	989	178	136	889	2348	1650	81028	139	114	295	266	127	0	0	390	280	286	306	113	0
ERR260174	0	128	755	169	0	65	94	0	0	272	149	0	0	126	167	152	733	588	326	128	305	296	246	352	309	292	565	210	0	436	163	137	368	2076	1925	820	156	116	78	186	95	0	0	150	189	182	159	132	0
ERR260175	0	0	415	0	246	110	0	0	0	0	173	0	0	0	0	91	458	359	202	100	331	192	168	255	271	348	404	135	0	300	91	97	365	1368	9827	600	86	100	114	220	0	0	0	301	130	128	127	136	0
ERR260176	0	0	151	116	251	65	0	0	0	0	91	0	0	63	0	144	262	531	70	0	111	137	68	254	148	172	412	332	0	239	0	218	432	1188	1005	961	59	106	62	311	0	132	0	211	98	83	240	0	0
ERR260273	0	0	91	0	0	0	0	0	0	0	0	0	0	0	0	0	104	89	0	0	95	0	0	0	0	0	0	0	0	0	0	0	0	420	143	102	0	0	0	0	0	0	0	0	0	0	0	0	0
ERR260274	0	0	265	0	0	0	0	0	0	0	0	0	0	0	0	0	87	147	63	0	197	135	108	126	90	138	0	0	0	0	0	0	0	0	255	147	0	0	0	0	0	0	0	0	0	0	0	0	0
ERR260178	0	83	298	115	116	112	0	0	0	253	76	0	0	85	0	115	550	556	133	145	135	232	63	155	85	74	359	263	0	221	153	98	513	1378	1375	802	183	120	111	195	83	0	0	326	185	125	154	120	0
ERR260179	0	0	845	135	322	0	0	0	0	0	152	0	0	131	0	85	736	473	223	0	162	146	206	139	267	161	452	216	0	264	117	147	240	1749	1185	759	233	184	0	103	108	0	0	164	94	82	264	0	0
ERR260180	0	64	494	82	0	83	0	0	0	360	66	0	0	0	0	70	554	475	340	0	531	386	359	420	471	351	191	0	0	0	0	0	269	787	3322	5302	0	98	0	112	0	0	0	153	0	83	136	0	0
ERR260181	0	71	341	75	132	73	64	0	0	152	65	0	0	86	185	69	473	495	201	65	88	276	188	70	118	70	383	143	0	276	0	81	292	1084	1052	649	0	61	0	88	0	0	0	126	149	131	0	82	0
ERR260182	0	0	469	72	105	66	0	0	0	272	113	0	0	67	0	98	322	439	243	0	103	247	111	125	145	121	239	82	0	189	0	76	161	865	769	659	0	0	68	165	0	0	0	104	0	109	119	77	0
ERR260185	0	0	345	0	0	0	64	0	0	383	106	0	0	80	0	67	624	591	237	82	309	284	146	404	302	260	324	94	0	251	73	84	333	868	1000	739	57	103	109	145	0	0	0	174	126	108	106	0	0
ERR260186	0	0	485	139	0	64	65	0	0	321	83	0	0	62	0	155	636	444	242	84	462	339	587	272	347	463	414	99	0	234	75	98	332	1091	1199	659	116	78	121	166	65	0	0	110	130	106	106	80	0
ERR260188	0	0	647	215	0	0	0	0	0	0	0	0	0	0	0	242	498	436	194	66	496	293	324	276	323	274	162	69	0	0	0	121	177	827	642	497	0	0	0	206	0	0	0	110	0	0	97	0	0
ERR260189	0	108	404	77	213	84	0	0	0	267	63	0	0	85	0	78	594	369	196	135	428	531	225	248	189	219	464	130	0	275	0	110	330	1176	1008	719	190	94	95	130	0	0	0	166	127	121	71	0	0
ERR260190	0	89	569	97	113	92	81	0	0	298	192	0	0	0	0	120	705	593	293	104	223	218	183	200	166	748	335	171	0	190	70	99	308	886	1217	744	110	91	0	162	0	0	0	297	203	98	119	113	0
ERR260191	0	75	286	95	111	61	88	0	0	268	80	0	0	60	0	57	398	478	212	66	97	168	122	0	88	0	326	87	0	205	0	146	268	1354	1028	697	88	87	112	166	0	0	0	134	151	123	119	0	0
ERR260192	0	75	392	87	220	0	85	0	0	0	0	0	0	0	0	133	431	411	173	0	207	247	239	158	152	338	227	117	0	155	0	0	160	760	2061	688	70	0	76	154	0	0	0	111	76	82	102	92	0
ERR260194	0	84	288	0	0	0	0	0	0	0	0	0	0	0	0	108	449	457	225	173	160	375	227	171	130	198	222	113	0	92	0	0	181	502	889	488	85	0	0	117	0	0	0	95	89	0	80	0	0
ERR260196	0	0	251	67	0	0	0	0	0	248	71	0	0	0	0	110	360	398	136	104	110	194	85	149	188	93	296	102	0	243	0	0	288	1076	1859	69832	62	65	111	184	0	0	0	156	159	71	103	0	0
ERR260276	0	0	0	0	0	0	0	0	0	0	0	0	0	0	0	0	68	127	0	0	0	0	0	0	0	0	0	0	0	0	0	0	0	0	81	86	0	0	0	0	0	0	0	0	0	0	0	0	0
ERR260198	0	72	572	104	380	71	68	0	0	0	149	0	0	0	0	106	541	560	264	67	302	471	126	158	174	161	292	144	0	195	140	101	284	1051	1241	814	130	0	80	98	0	0	0	141	103	65	166	107	0
ERR260199	0	0	213	0	0	0	0	0	0	0	163	0	0	171	0	93	278	240	92	63	139	182	112	88	60	65	295	132	0	333	0	159	385	1379	861	356	0	90	80	150	0	0	0	196	155	80	97	120	0
ERR260201	0	0	289	0	0	0	0	0	0	220	0	0	0	0	0	0	539	590	355	0	206	111	156	81	207	161	0	0	0	0	0	0	0	247	466	419	0	0	0	116	0	0	0	0	0	0	0	0	0
ERR260202	0	77	231	96	0	0	0	0	0	0	99	0	0	129	0	69	512	379	142	0	80	186	123	0	117	0	198	0	0	143	0	0	118	677	774	589	65	0	67	165	0	0	0	91	71	78	141	0	0
ERR260203	0	0	158	0	0	0	0	0	0	0	0	0	0	0	0	58	248	192	100	0	97	74	67	79	93	67	169	110	0	0	0	0	130	479	559	241	74	0	0	88	0	0	0	0	0	0	72	0	0
ERR260205	0	59	301	166	0	0	0	0	0	0	0	0	0	0	0	74	365	356	175	57	184	129	181	108	170	141	286	111	0	0	0	73	212	854	616	412	0	0	61	98	58	0	0	111	85	0	120	108	0
ERR260206	0	72	251	83	0	0	0	0	0	0	152	0	0	0	0	75	296	243	80	0	254	127	161	152	132	155	257	83	0	192	0	0	229	793	736	414	75	73	83	98	68	0	0	0	127	0	75	0	0
ERR260207	0	71	298	0	0	0	0	0	0	0	0	0	0	0	0	92	417	320	88	0	93	274	72	59	85	64	286	103	0	0	0	0	222	785	741	449	83	0	86	84	0	0	0	91	0	0	125	0	0
ERR260208	0	0	346	128	0	0	0	0	0	0	154	0	0	0	0	111	428	398	183	0	248	172	83	84	82	120	251	111	0	188	0	0	221	1005	904	570	88	0	68	93	63	0	0	133	124	79	74	0	0
ERR260210	0	68	212	72	207	0	0	0	0	0	75	0	0	0	0	122	316	184	87	0	100	214	101	71	120	60	244	80	0	0	66	80	322	1200	822	434	125	85	0	123	0	120	0	125	184	109	144	0	0
ERR275252	0	0	392	0	0	0	0	0	0	0	0	0	0	0	0	110	369	429	106	96	206	189	0	136	156	152	188	0	0	0	0	0	138	601	529	434	0	0	0	0	0	0	0	0	82	0	0	0	0
ERR260214	0	0	85	0	0	0	0	0	0	0	0	0	0	0	0	0	369	547	128	0	0	0	0	0	64	0	0	0	0	0	0	0	0	0	215	275	0	0	0	0	0	0	0	0	111	0	0	0	0
ERR260215	0	0	174	0	0	0	0	0	0	0	0	0	0	0	0	116	315	218	61	0	82	104	0	92	80	0	0	0	0	0	0	0	111	371	283	212	0	0	0	0	0	0	0	0	0	0	106	0	0
ERR260216	0	0	181	0	0	0	0	0	0	0	0	0	0	0	0	0	118	113	57	0	100	78	67	0	0	192	0	0	0	0	0	0	0	274	212	142	0	0	0	0	0	0	0	0	0	0	0	0	0
ERR260217	0	0	162	0	0	0	0	0	0	0	0	0	0	0	0	66	249	188	58	0	127	75	0	0	0	98	0	0	0	0	0	0	110	380	240	298	0	0	0	0	0	0	0	0	0	0	0	0	0
ERR260218	0	0	234	0	0	0	0	0	0	0	0	0	0	0	0	0	282	182	117	0	224	125	125	137	134	107	0	0	0	0	0	0	0	373	322	164	0	0	0	0	0	0	0	0	0	0	71	0	0
ERR260221	0	0	186	148	0	0	0	0	0	0	0	0	0	0	0	0	196	132	56	0	250	96	157	118	126	152	136	0	0	0	0	0	112	501	367	328	0	0	0	76	0	0	0	0	0	0	77	0	0
ERR260223	0	0	71	0	0	0	0	0	0	0	0	0	0	0	0	0	145	134	62	0	0	0	0	0	0	0	0	0	0	0	0	0	0	299	174	102	0	0	0	0	0	0	0	0	0	0	0	0	0
ERR526291	0	61	182	0	149	0	0	0	0	0	80	0	0	0	0	0	134	286	0	0	59	122	0	72	0	97	0	0	0	0	0	0	0	385	225	164	0	0	0	95	0	0	0	0	0	0	0	0	0
ERR527046	0	61	106	0	124	0	0	0	0	110	0	0	0	0	0	0	146	108	60	0	0	97	60	0	0	62	0	0	0	0	97	0	85	559	217	161	75	0	0	0	0	0	0	0	0	0	0	0	0
ERR527047	0	0	249	0	0	0	0	0	0	0	0	0	0	0	0	63	221	192	0	57	143	89	60	80	69	72	188	69	0	0	0	0	170	620	408	156	0	0	0	59	0	0	0	0	0	0	114	0	0
ERR527048	0	0	134	0	0	0	0	0	0	244	0	0	0	0	0	160	183	222	97	205	183	57	0	193	0	64	153	82	0	0	101	0	105	662	297	332	0	0	61	0	0	0	0	0	0	0	0	0	0
ERR527049	0	0	63	0	0	0	0	0	0	0	0	0	0	0	0	0	0	0	0	0	0	0	0	0	0	0	0	0	0	0	0	0	0	0	362	0	0	0	0	0	0	0	0	0	0	0	0	0	0
ERR527050	0	0	178	0	136	0	0	0	0	0	0	0	0	0	0	85	146	180	60	0	82	0	0	109	0	0	196	75	0	0	0	0	108	557	1476	200	0	0	0	0	0	0	0	0	0	0	0	0	0
ERR527051	0	211	166	0	0	0	0	0	0	0	0	0	0	0	0	64	162	406	75	0	174	99	111	129	0	67	111	0	0	0	0	130	120	684	377	204	0	0	0	181	0	0	0	0	0	0	0	0	0
ERR527052	0	0	0	0	0	0	0	0	0	0	0	0	0	0	0	0	0	0	0	0	0	0	0	0	0	0	0	0	0	0	0	0	0	0	0	0	0	0	0	0	0	0	0	0	0	0	0	0	0
ERR527053	0	86	804	62	125	123	0	0	0	244	0	0	0	78	0	432	409	446	257	189	214	152	181	384	177	196	231	129	0	113	0	322	250	1050	809	499	0	86	75	321	0	0	0	122	164	90	143	0	0
ERR527054	0	0	111	0	0	0	0	0	0	0	0	0	0	0	0	0	68	99	0	0	0	0	0	0	0	93	0	0	0	0	0	0	0	348	144	75	0	0	0	0	0	0	0	0	0	0	0	0	0
ERR527055	0	0	321	0	0	0	0	0	0	0	0	0	0	0	0	0	162	207	72	0	108	62	0	83	0	153	162	83	0	0	79	0	164	553	394	170	0	0	0	72	0	0	0	0	0	0	77	0	0
ERR527056	0	0	70	0	0	0	0	0	0	0	0	0	0	0	0	0	58	89	0	0	0	80	0	0	0	0	0	0	0	0	0	0	0	373	184	179	0	0	0	132	0	0	0	0	0	0	0	0	0
ERR527057	0	70	94	0	0	0	0	0	0	0	0	0	0	0	0	0	85	102	0	0	0	98	0	69	0	0	123	100	0	0	0	0	0	410	232	256	0	0	0	174	0	0	0	0	0	0	0	0	0
ERR527058	0	0	67	0	0	0	0	0	0	0	0	0	0	0	0	0	89	0	0	0	0	0	0	0	0	0	0	0	0	0	0	0	0	289	761	287	0	0	0	0	0	0	0	0	0	0	0	0	0
ERR527059	0	97	174	77	0	152	0	0	0	0	0	0	0	109	0	0	269	148	78	0	94	0	0	86	0	90	208	221	0	210	99	101	249	711	2891	968	66	0	96	132	92	0	0	189	114	74	117	77	0
ERR527060	0	0	148	0	114	0	0	0	0	0	0	0	0	0	0	0	81	157	0	0	106	0	0	59	0	83	0	0	0	0	0	0	0	0	90	0	0	0	0	0	0	0	0	0	0	0	0	0	0
ERR527061	0	0	230	0	115	0	0	0	0	0	106	0	0	0	136	0	194	231	94	0	156	0	0	135	0	113	0	109	0	0	0	0	101	297	202	95	0	0	0	0	0	0	0	0	0	0	0	0	0
ERR527062	0	0	232	157	0	0	0	0	0	0	0	0	0	0	0	111	279	246	105	127	76	151	0	67	0	76	159	127	0	0	0	0	188	1021	517	326	0	0	0	71	0	0	0	0	0	0	0	0	0
ERR527063	0	0	267	0	0	0	0	0	0	196	0	0	0	0	0	66	263	179	78	0	178	0	61	91	0	114	105	164	0	0	173	0	122	367	2172	1195	0	0	0	0	0	0	0	0	117	0	0	114	0
ERR527064	0	72	378	0	0	0	0	0	0	266	0	0	0	0	0	60	61	391	145	0	200	0	134	81	70	142	389	0	0	0	91	0	138	683	196	293	0	0	136	0	0	0	0	0	0	0	0	0	0
ERR527065	0	0	334	0	0	0	0	0	0	0	0	0	0	0	0	0	142	249	78	0	135	71	0	98	61	186	131	92	0	0	0	0	109	678	366	147	0	0	0	0	0	0	0	0	0	0	0	0	0
ERR527066	0	0	145	0	0	0	0	0	0	218	0	0	0	0	0	71	176	241	0	0	97	62	61	381	0	61	289	113	0	192	0	333	153	975	582	208	0	0	60	368	0	0	0	0	0	0	0	113	0
ERR527067	0	0	0	0	0	0	0	0	0	0	0	0	0	0	0	0	0	88	0	0	0	0	0	0	0	0	0	0	0	0	0	0	0	0	82	0	0	0	0	0	0	0	0	0	0	0	0	0	0
ERR527068	0	0	0	0	0	0	0	0	0	0	0	0	0	0	0	0	0	0	0	0	0	0	0	0	0	0	0	0	0	0	0	0	0	0	0	64	0	0	0	0	0	0	0	0	0	0	0	0	0
ERR527069	0	0	0	0	0	0	0	0	0	0	0	0	0	0	0	0	0	0	0	0	0	0	0	0	0	0	0	0	0	0	0	0	0	0	67	99	0	0	0	0	0	0	0	0	0	0	0	0	0
ERR527070	0	0	120	65	0	0	0	0	0	172	0	0	0	0	0	115	234	318	58	0	69	81	0	0	87	0	179	96	0	0	0	0	129	781	259	271	0	0	0	0	0	0	0	0	0	0	0	0	0
ERR527071	0	0	174	73	0	0	73	0	0	161	79	0	0	0	0	0	269	194	0	0	168	93	0	100	0	244	279	124	0	175	85	73	304	745	477	265	61	0	80	65	0	0	0	123	0	0	0	0	0
ERR527072	0	0	213	0	0	0	0	0	0	140	0	0	0	0	0	0	132	221	89	0	200	93	0	101	0	101	234	162	0	0	111	0	126	1167	413	295	0	0	60	0	0	0	0	151	101	72	63	0	0
ERR527073	0	0	577	456	124	0	120	0	0	262	74	0	0	0	180	66	375	507	119	0	451	168	153	84	66	659	553	254	0	281	209	283	367	1432	2471	1158	123	132	283	240	96	0	0	285	258	156	89	126	0
ERR527074	0	0	0	0	0	0	0	0	0	0	0	0	0	0	0	0	0	0	0	0	0	0	0	0	0	0	0	0	0	0	0	0	0	0	0	0	0	0	0	0	0	0	0	0	0	0	0	0	0
ERR527075	0	0	0	0	0	0	0	0	0	0	0	0	0	0	0	0	0	78	0	0	63	0	0	0	0	0	0	0	0	0	0	0	0	0	80	0	0	0	0	0	0	0	0	0	0	0	0	0	0
ERR527076	0	842	631	184	0	272	99	0	0	96	0	0	316	60	99	470	484	499	312	0	900	489	586	667	372	572	281	108	0	0	392	0	552	1016	794	795	125	0	0	84	0	0	0	163	153	0	0	260	0
ERR527077	0	0	254	0	0	0	0	0	0	0	0	0	0	0	0	0	321	322	160	0	86	0	90	0	76	79	358	108	0	0	0	84	137	433	530	327	0	0	0	76	0	0	0	141	153	66	0	0	0
ERR527078	0	95	199	0	0	0	0	0	0	0	0	0	0	0	0	151	159	123	0	0	83	0	77	99	0	84	148	85	0	0	0	81	146	557	608	1003	0	0	0	187	0	0	0	0	0	0	114	0	0
ERR527079	0	131	695	101	92	70	76	0	0	285	105	0	0	94	122	160	517	503	256	140	444	147	297	301	204	416	285	144	0	215	158	115	222	1204	1327	592	87	94	62	264	87	0	0	135	155	80	189	136	0
ERR527080	0	0	227	0	0	0	0	0	0	0	0	0	0	0	0	62	127	187	86	0	0	0	79	0	82	131	207	80	0	0	0	0	105	377	251	296	0	0	0	0	0	0	0	0	0	0	0	0	0
ERR527081	0	108	623	117	123	102	0	0	0	392	115	0	0	107	0	103	494	397	376	188	855	250	266	229	350	567	471	242	0	285	181	172	423	1493	1597	739	130	162	171	287	117	0	0	338	327	185	175	185	0
ERR527082	0	0	172	108	0	0	0	0	0	0	273	0	0	0	0	0	167	155	0	2066	224	90	140	77	0	94	186	104	0	140	0	0	230	668	521	317	0	71	67	68	68	0	0	183	0	0	160	85	0
ERR527083	0	0	0	0	0	0	0	0	0	0	0	0	0	0	0	0	137	146	0	0	83	0	0	0	0	237	0	0	0	0	0	0	77	295	205	133	0	0	0	74	0	0	0	0	0	0	0	0	0
ERR527084	0	0	125	0	0	0	0	0	0	0	121	0	0	118	0	67	296	282	56	0	157	76	0	0	0	500	226	73	0	120	0	0	133	707	501	237	0	0	0	131	0	0	0	135	0	87	0	0	0
ERR527085	0	0	76	0	0	0	0	0	0	0	0	0	0	0	0	0	87	112	0	0	72	0	0	0	0	0	0	0	0	0	0	0	0	282	512	288	0	0	0	0	0	0	0	0	0	0	0	0	0
ERR527086	0	0	0	0	0	0	0	0	0	0	0	0	0	0	0	0	0	0	0	0	0	0	0	0	0	0	0	0	0	0	0	0	0	0	71	0	0	0	0	0	0	0	0	0	0	0	0	0	0
ERR527087	0	0	119	0	0	0	0	0	0	0	0	0	0	0	0	0	123	127	0	0	85	0	0	0	0	86	127	0	0	0	0	0	0	262	170	101	0	0	0	0	0	0	0	0	0	0	0	0	0
ERR527088	0	0	267	0	178	0	96	0	0	0	0	0	0	101	0	63	157	187	209	0	113	112	61	0	0	91	271	100	0	0	90	0	258	764	377	253	0	0	81	104	0	0	0	0	0	0	0	0	0
ERR527089	0	132	393	97	107	82	82	0	0	212	94	0	0	72	0	138	533	440	183	70	773	268	247	297	295	507	283	139	0	177	145	88	280	1053	737	659	84	116	108	140	0	0	0	116	141	102	192	87	0
ERR527090	0	252	235	175	0	0	0	0	0	0	80	0	317	0	0	102	283	211	108	63	206	0	0	228	58	116	149	0	0	0	116	141	177	341	397	272	64	0	63	247	0	0	0	0	0	0	0	75	0
ERR527091	0	364	485	58	0	0	0	0	270	0	0	0	0	0	0	0	90	86	68	0	165	0	68	380	0	148	0	0	0	0	0	457	194	909	304	239	0	0	0	376	0	0	0	0	0	0	0	0	0
ERR527092	0	0	59	0	0	0	0	0	0	0	0	0	0	0	0	0	0	0	101	0	0	0	0	0	0	0	0	0	0	0	0	0	0	222	94	0	0	0	0	0	0	0	0	0	0	0	0	0	0
ERR527093	0	0	206	0	0	0	0	0	0	181	0	0	0	0	0	85	115	197	342	0	117	146	0	73	0	175	220	121	0	0	0	102	136	633	357	181	0	0	0	87	0	0	0	0	0	0	65	76	0
ERR527094	0	0	81	0	83	0	0	0	0	138	0	0	0	0	0	0	0	110	0	0	0	0	0	0	0	0	0	0	0	0	0	0	0	344	0	0	0	0	0	0	0	0	0	0	0	0	0	0	0
ERR527095	0	0	73	0	0	0	0	0	0	114	0	0	0	0	0	0	0	75	0	0	0	0	0	0	0	0	0	0	0	0	0	0	0	317	0	0	0	0	0	0	0	0	0	0	0	0	0	0	0
ERR527096	0	0	0	0	0	0	0	0	0	0	0	0	0	0	0	0	0	79	0	0	0	0	0	0	0	0	0	0	0	0	0	0	0	0	67	94	0	0	0	0	0	0	0	0	0	0	0	0	0
ERR527097	0	0	0	0	0	0	0	0	0	0	0	0	0	0	0	0	0	0	0	0	0	0	0	0	0	0	0	0	0	0	0	0	0	0	65	60	0	0	0	0	0	0	0	0	0	0	0	0	0
ERR527098	0	122	86	0	0	0	0	0	0	114	0	0	0	71	0	144	103	201	58	0	59	0	0	127	0	0	0	0	0	0	0	0	0	405	208	173	0	0	0	0	0	0	0	0	0	0	0	0	0
ERR527099	0	0	0	0	0	0	0	0	0	0	0	0	0	0	0	0	0	62	0	0	84	0	0	70	0	143	0	0	0	0	0	0	0	0	0	0	0	0	0	0	0	0	0	0	0	0	0	0	0
ERR527100	0	79	242	144	0	0	0	0	0	0	0	0	0	0	0	0	155	278	66	0	281	143	160	316	289	310	128	75	0	0	0	0	85	572	241	218	0	0	126	87	0	0	0	0	0	0	0	0	0
ERR527101	0	0	101	0	0	0	0	0	223	0	0	0	0	0	0	0	90	840	0	0	93	0	0	420	0	56	0	0	0	0	0	248	69	532	138	108	0	0	0	447	0	0	0	0	0	0	502	0	0
ERR527102	0	0	0	0	0	0	0	0	0	0	0	0	0	0	0	0	0	0	0	0	0	0	0	0	0	0	0	0	0	0	0	0	0	0	0	0	0	0	0	0	0	0	0	0	0	0	0	0	0
ERR527103	0	0	273	63	281	0	0	0	0	0	0	0	0	0	0	0	199	415	64	0	124	119	165	85	0	101	231	133	0	0	0	0	204	333	486	453	0	0	0	0	0	0	0	0	0	0	0	0	80
ERR527104	0	0	273	0	0	0	0	0	0	0	0	0	0	0	0	0	173	126	0	60	166	155	104	90	0	126	201	79	0	102	0	0	221	631	512	232	0	60	0	94	57	0	0	0	125	78	76	0	0
ERR527105	0	144	77	145	117	0	69	0	0	374	0	0	0	0	0	151	142	174	89	0	60	0	0	0	0	0	504	128	0	299	0	0	167	628	534	370	0	81	114	0	106	0	0	0	0	0	0	68	0
ERR527106	0	0	217	130	0	109	88	0	0	253	0	0	0	67	0	176	203	217	184	0	314	97	159	155	64	72	0	0	0	0	0	0	135	566	315	159	0	0	0	95	0	0	0	0	0	0	122	0	0
ERR527107	0	103	623	74	411	0	119	0	0	471	0	0	0	0	0	171	564	567	230	97	412	296	155	256	196	438	483	201	0	122	99	0	220	1318	795	373	0	101	189	158	61	0	0	99	108	78	167	90	0
ERR527108	0	126	794	83	129	0	122	0	0	300	0	0	0	115	175	142	461	566	245	58	712	254	296	405	187	414	350	161	0	149	89	0	270	806	602	443	128	0	95	213	0	0	0	0	115	84	65	113	0
ERR527109	0	0	0	0	0	0	0	0	0	0	0	0	0	0	0	0	0	0	0	0	0	0	0	0	0	0	0	0	0	0	0	0	0	219	93	0	0	0	0	0	0	0	0	0	0	0	0	0	0
ERR527110	0	0	168	0	0	0	0	0	0	0	0	0	0	0	0	0	133	121	0	0	130	0	0	0	0	129	167	78	0	0	0	0	143	489	266	110	0	0	0	73	0	0	0	0	0	0	0	0	0
ERR527111	0	0	0	0	0	0	0	0	0	0	0	0	0	0	0	0	0	0	0	0	0	0	0	0	0	0	0	0	0	0	0	0	0	341	91	0	0	0	0	0	0	0	0	0	0	0	0	0	0
ERR527112	0	0	299	0	96	0	0	0	0	0	0	0	0	86	126	101	156	206	85	142	120	59	121	94	92	140	0	0	0	0	0	0	94	550	206	173	0	0	0	0	0	0	0	0	0	0	0	0	0
ERR527113	0	0	101	0	0	0	0	0	0	0	0	0	0	0	0	0	107	117	0	0	81	0	0	0	0	0	120	0	0	0	0	0	0	294	193	135	0	0	0	76	0	0	0	0	0	0	0	0	0
ERR527114	0	0	74	0	0	0	0	0	0	0	0	0	0	0	0	0	79	0	0	0	0	0	0	0	0	0	0	0	0	0	0	0	0	189	126	251	0	0	0	0	0	0	0	0	0	0	0	0	0
ERR527115	0	0	98	0	0	0	0	0	0	0	0	0	0	0	0	0	86	66	58	0	75	0	0	71	0	0	0	0	0	0	0	0	0	0	102	207	0	0	0	0	0	0	0	0	0	0	0	0	0
ERR527116	0	0	237	0	130	0	79	0	0	0	98	0	0	90	168	0	267	288	123	0	149	68	0	0	86	70	136	80	0	0	0	0	170	461	569	216	0	123	0	0	0	0	0	0	134	0	73	0	0
ERR527117	0	0	0	0	0	0	0	0	0	0	0	0	0	0	0	0	0	0	0	0	0	0	0	0	0	0	0	0	0	0	0	0	0	0	0	0	0	0	0	0	0	0	0	0	0	0	0	0	0
ERR527118	0	0	98	121	0	0	0	0	0	0	143	0	0	0	0	0	207	114	0	68	0	64	0	0	0	0	319	225	0	187	90	80	298	784	1269	571	0	0	65	128	75	0	0	102	96	103	109	99	0
ERR527119	0	0	98	0	0	0	0	0	0	0	0	0	0	0	0	0	0	0	0	0	0	0	0	0	0	0	0	0	0	0	0	0	0	349	81	65	0	0	0	0	0	0	0	0	0	0	0	0	0
ERR527120	0	0	828	76	0	0	59	0	0	350	0	0	0	78	0	104	376	386	137	0	223	161	59	254	57	163	159	110	0	200	77	189	179	1102	567	496	0	0	60	187	0	0	0	0	0	0	0	113	0
ERR527121	0	476	1170	233	186	64	81	0	0	421	165	0	0	0	0	198	654	636	450	139	1225	319	634	872	409	640	712	161	0	291	126	237	292	1916	3615	2965	86	190	65	534	56	0	0	138	188	81	200	91	0
ERR527122	0	79	188	0	0	0	0	0	0	0	78	0	160	0	0	0	176	226	62	0	70	181	0	69	56	0	216	102	0	0	0	0	0	505	282	325	0	0	69	0	0	0	0	0	0	0	105	0	0
ERR527123	0	438	373	0	300	0	0	0	0	174	0	0	0	62	0	65	560	326	243	0	775	257	289	497	284	262	264	92	0	184	0	276	306	1093	825	319	0	0	0	375	72	0	0	99	93	95	87	94	0
ERR527124	0	102	307	93	0	61	0	0	0	247	71	0	0	59	0	115	320	310	96	0	154	126	79	96	67	168	253	147	0	254	124	85	275	1494	778	369	124	87	0	125	0	0	0	90	91	0	117	99	0
ERR527125	0	0	0	0	0	0	0	0	0	89	0	0	0	0	0	0	0	0	0	0	0	0	0	0	0	0	0	0	0	0	0	0	0	315	129	0	0	0	0	0	0	0	0	0	0	0	0	0	0
ERR527126	0	0	290	0	110	0	0	0	0	134	0	0	0	0	0	65	280	302	98	0	187	0	67	101	0	110	220	0	0	92	0	0	70	361	494	336	0	0	0	191	0	0	0	95	141	0	0	0	0
ERR527127	0	0	314	0	0	0	0	0	0	0	0	0	0	0	0	115	199	136	0	0	185	108	117	253	94	152	122	90	0	0	0	0	88	444	294	152	0	0	0	0	0	0	0	0	0	0	0	90	0
ERR527128	0	0	267	0	0	110	0	0	0	0	96	0	0	0	0	77	277	241	129	0	189	115	129	147	0	108	199	103	0	111	0	0	230	607	529	501	0	66	0	120	60	0	0	0	0	0	59	0	0
ERR527129	0	0	98	0	0	0	0	0	0	0	0	0	0	0	0	0	108	130	0	0	0	0	0	0	0	0	0	0	0	0	0	0	0	0	124	99	0	0	0	0	0	0	0	0	72	0	0	0	0
ERR527130	0	0	86	0	0	0	0	0	0	154	0	0	0	0	0	0	74	175	0	122	0	0	0	96	0	115	0	0	0	0	0	0	0	573	184	136	0	0	0	0	0	0	0	0	0	0	0	0	0
ERR527131	0	0	0	0	0	0	0	0	0	0	0	0	0	0	0	0	0	0	0	0	0	0	0	0	0	0	0	0	0	0	0	0	0	0	0	0	0	0	0	0	0	0	0	0	0	0	0	0	0
ERR527132	0	0	178	0	0	0	0	0	0	0	0	0	0	0	0	66	200	177	56	0	110	84	66	0	0	130	110	0	0	0	0	0	70	322	332	181	0	0	0	0	0	0	0	0	0	0	0	0	0
ERR527133	0	0	92	0	0	0	0	0	0	0	0	0	0	0	0	0	123	97	0	0	71	0	0	0	0	97	0	0	0	0	0	0	76	281	267	150	0	0	0	0	0	0	0	0	0	0	0	0	0
ERR527134	0	0	128	0	0	0	0	0	0	0	0	0	0	0	0	0	65	85	77	0	112	0	0	0	0	91	0	0	0	0	0	0	0	417	198	161	0	0	0	0	0	0	0	0	0	0	0	0	0
ERR527135	0	0	94	0	0	0	0	0	0	0	0	0	0	0	0	0	145	166	0	0	0	0	0	0	0	0	0	0	0	0	0	0	85	503	308	191	0	0	0	65	0	0	0	0	0	0	0	0	0
ERR527136	0	0	256	73	188	0	0	0	0	0	71	0	0	0	0	0	207	267	98	0	95	64	0	124	0	148	205	109	0	128	95	0	113	462	483	430	0	0	137	126	0	0	0	0	91	0	0	0	0
ERR527137	0	0	128	0	0	0	0	0	0	0	0	0	0	0	0	0	0	0	0	0	0	0	0	0	0	72	0	0	0	0	0	0	0	0	0	0	0	0	0	0	0	0	0	0	0	0	0	0	0
ERR527138	0	0	232	0	0	0	0	0	0	183	0	0	0	0	0	128	136	227	76	0	111	0	76	86	79	62	0	0	0	0	0	0	0	602	141	152	0	0	0	0	0	0	0	0	0	0	0	0	0
ERR527139	0	0	73	0	0	0	0	0	0	0	0	0	0	0	0	0	0	0	0	0	0	0	0	0	0	0	0	0	0	0	0	0	0	336	127	67	0	0	0	0	0	0	0	0	0	0	0	0	0
ERR527140	0	0	194	0	0	0	0	0	0	0	0	0	0	0	0	69	107	201	58	0	185	0	0	0	71	96	0	0	0	0	0	0	0	377	211	96	0	0	0	0	0	0	0	0	0	0	0	0	0
ERR527141	0	0	0	0	0	0	0	0	0	0	0	0	0	0	0	0	0	0	0	0	0	0	0	0	0	0	0	0	0	0	0	0	0	0	0	0	0	0	0	0	0	0	0	0	0	0	0	0	0
ERR527142	0	122	100	0	0	0	0	0	0	103	0	0	0	0	0	0	59	109	0	0	0	0	0	0	0	0	155	0	0	0	0	0	0	127	134	0	0	0	76	0	0	0	0	0	0	0	0	0	0
ERR527143	0	155	3429	414	254	238	331	0	301	1247	114	0	0	328	0	396	1622	1728	526	250	937	740	242	1204	259	787	942	659	0	984	294	948	912	5343	2671	2120	143	175	366	1068	233	0	0	220	256	141	230	548	0
ERR527144	0	0	0	0	0	0	0	0	0	0	0	0	0	0	0	0	0	96	0	0	0	0	0	0	0	0	0	0	0	0	0	0	0	0	66	0	0	0	0	0	0	0	0	0	0	0	0	0	0
ERR527145	0	0	0	0	0	0	0	0	0	0	0	0	0	0	0	0	0	0	0	0	0	0	0	0	0	0	0	0	0	0	0	0	0	0	0	0	0	0	0	0	0	0	0	0	0	0	0	0	0
ERR527146	0	0	82	0	0	0	0	0	0	233	0	0	0	0	0	0	86	168	0	0	0	0	0	137	0	155	121	102	0	0	219	391	205	1538	247	226	0	0	0	255	0	0	0	0	0	0	0	111	0
ERR527147	0	0	323	0	0	0	86	0	0	163	0	0	0	0	0	63	241	226	129	0	159	89	85	0	119	72	166	76	0	0	107	0	115	397	440	301	0	0	64	0	0	0	0	0	0	0	0	0	0
ERR527148	0	74	146	489	0	0	0	0	0	0	0	0	0	0	0	143	183	163	93	0	0	141	0	134	65	374	181	275	0	141	0	327	224	1185	4440	2069	0	66	0	409	0	0	0	90	0	0	63	164	0
ERR527149	0	0	210	0	0	0	83	0	0	197	0	0	0	0	0	65	394	243	103	68	91	84	0	0	66	96	234	64	0	0	0	0	146	1219	913	326	0	0	90	97	62	0	0	0	123	0	0	0	0
ERR527150	0	626	0	0	0	0	0	0	0	0	0	0	0	0	0	0	70	82	0	0	0	0	0	0	0	0	0	0	0	0	0	0	0	395	161	0	0	0	0	104	0	0	0	0	0	0	0	0	0
ERR527151	0	0	0	0	0	0	0	0	0	0	0	0	0	0	0	0	0	0	0	0	0	0	0	0	0	0	0	0	0	0	0	0	0	0	0	0	0	0	0	0	0	0	0	0	0	0	0	0	0
ERR527152	0	0	0	0	0	0	0	0	0	0	0	0	0	0	0	0	0	0	0	0	0	0	0	0	0	0	0	0	0	0	0	0	0	0	0	113	0	0	0	0	0	0	0	0	0	0	0	0	0
ERR527153	0	114	85	0	0	0	0	0	0	0	0	0	0	0	0	0	0	275	0	0	143	0	0	147	0	0	0	0	0	366	0	126	0	288	205	204	0	0	0	206	0	0	0	0	0	0	0	0	0
ERR527154	0	61	0	0	0	0	0	0	0	0	0	0	0	0	0	0	0	0	0	0	0	0	0	0	0	0	0	0	0	0	0	0	0	0	112	0	0	0	0	0	0	0	0	0	0	0	0	0	0
ERR527155	0	65	0	0	0	0	0	0	0	0	0	0	0	0	0	0	0	0	0	0	0	0	0	0	0	0	0	0	0	0	0	0	0	0	156	0	0	0	0	0	0	0	0	0	0	0	0	0	0
ERR527156	0	88	114	0	0	0	0	0	0	0	0	0	0	0	0	0	0	0	0	0	68	0	0	140	0	73	0	0	0	0	0	93	0	0	72	0	0	0	0	92	0	0	0	0	0	0	0	0	0
ERR527157	0	0	0	0	0	0	0	0	0	0	0	0	0	0	0	0	0	0	0	0	0	0	0	0	0	0	0	0	0	0	0	0	0	0	0	0	0	0	0	0	0	0	0	0	0	0	0	0	0
ERR527158	0	0	79	0	0	0	0	0	0	0	0	0	0	0	0	0	0	80	0	0	0	0	0	0	0	0	0	75	0	0	0	0	0	150	121	93	0	0	0	0	0	0	0	0	0	0	0	0	0
ERR527159	0	0	371	0	162	0	107	0	0	303	92	0	0	98	114	241	418	542	191	0	374	232	171	166	151	262	555	268	0	170	230	118	602	1777	1079	588	71	85	183	211	0	0	0	237	251	109	143	154	0
ERR527160	0	0	711	0	0	0	0	0	0	322	0	0	0	0	0	217	293	332	220	0	69	0	162	68	94	238	0	0	0	0	0	0	0	692	267	554	0	0	0	0	0	0	0	0	0	0	0	0	0
ERR527161	0	0	0	0	0	0	0	0	0	0	0	0	0	0	0	0	0	0	0	0	0	0	0	0	0	0	0	0	0	0	0	0	0	0	110	0	0	0	0	0	0	0	0	0	0	0	0	0	0
ERR527162	0	0	0	0	0	0	0	0	0	0	0	0	0	0	0	0	65	0	0	0	0	0	0	0	0	0	0	0	0	0	0	0	0	0	149	0	0	0	0	0	0	0	0	0	0	0	0	0	0
ERR527164	0	57	156	0	0	0	0	0	0	286	113	0	0	0	0	59	192	266	78	111	74	87	86	0	62	0	331	69	0	0	0	76	146	925	1108	1771	64	0	0	78	0	0	0	77	77	66	76	0	0
ERR527165	0	0	785	0	0	0	0	0	0	0	0	0	0	0	0	63	323	785	239	0	933	102	215	1380	116	414	100	0	0	0	277	394	63	337	471	758	0	0	0	323	0	0	0	0	88	0	0	0	0
ERR527166	0	0	0	0	0	0	0	0	0	0	0	0	0	0	0	0	0	0	0	0	0	0	0	0	0	0	0	0	0	0	0	0	0	0	0	0	0	0	0	0	0	0	0	0	0	0	0	0	0
ERR527167	0	0	0	0	0	0	0	0	0	0	0	0	0	0	0	0	0	0	0	0	0	0	0	0	0	0	0	0	0	0	0	0	0	0	0	0	0	0	0	0	0	0	0	0	0	0	0	0	0
ERR527168	0	0	123	0	0	0	0	0	0	135	0	0	0	0	0	0	124	117	0	0	175	0	0	0	0	190	240	0	0	0	0	0	0	394	413	142	99	0	147	0	0	0	0	0	0	0	0	0	0
ERR527169	0	0	0	0	0	0	0	0	0	0	0	0	0	0	0	0	0	0	0	0	0	0	0	0	0	0	0	0	0	0	0	0	0	0	0	0	0	0	0	0	0	0	0	0	0	0	0	0	0
ERR527170	0	0	0	0	0	0	0	0	0	0	0	0	0	0	0	0	0	0	0	0	0	0	0	0	0	0	0	0	0	0	0	0	143	0	56	0	0	0	0	0	0	0	0	0	0	0	0	0	0
ERR527171	0	0	60	0	0	0	0	0	0	0	0	0	0	0	0	0	0	0	0	0	0	0	0	0	0	0	0	0	0	0	0	0	193	0	0	0	0	0	0	0	0	0	0	0	0	0	0	0	0
ERR527172	0	0	118	0	0	0	0	0	0	267	0	0	0	0	0	124	140	297	0	0	73	77	63	0	0	0	0	68	0	0	122	0	82	659	325	319	0	0	0	0	0	0	0	0	0	0	0	0	0
ERR527173	0	0	0	0	0	0	0	0	0	0	0	0	0	0	0	0	0	0	0	0	0	0	0	0	0	0	0	0	0	0	0	0	0	0	0	0	0	0	0	0	0	0	0	0	0	0	0	0	0
ERR527174	0	0	0	0	0	0	0	0	0	0	0	0	0	0	0	0	0	0	0	0	0	0	0	0	0	0	0	0	0	0	0	0	0	0	0	0	0	0	0	0	0	0	0	0	0	0	0	0	0
ERR527175	0	0	172	0	0	64	78	0	0	364	128	0	0	64	0	161	231	341	98	0	70	70	0	74	0	84	481	169	0	0	73	90	199	1344	691	331	73	87	62	105	64	0	0	0	99	69	80	276	0
ERR527176	0	0	0	0	0	0	0	0	0	0	0	0	0	0	0	0	0	0	0	0	0	0	0	0	0	0	0	0	0	0	0	0	0	0	0	0	0	0	0	0	0	0	0	0	0	0	0	0	0
ERR527177	0	0	0	0	0	0	0	0	0	0	0	0	0	0	0	0	0	0	0	0	0	0	0	0	0	0	0	0	0	0	0	0	0	0	0	0	0	0	0	0	0	0	0	0	0	0	0	0	0
ERR527178	0	0	0	0	0	0	0	0	0	0	0	0	0	0	0	0	0	0	0	0	0	0	0	0	0	0	194	0	0	0	0	0	0	279	62	0	0	0	0	65	0	0	0	0	0	0	0	0	0
ERR527179	0	117	62	0	0	0	0	0	0	0	0	0	0	0	0	0	66	90	0	0	0	0	0	0	0	0	0	0	0	0	0	0	0	0	169	89	0	0	0	0	0	0	0	0	0	0	0	0	0
ERR527180	0	0	0	0	0	0	0	0	0	0	0	0	0	0	0	0	65	89	0	0	0	0	0	0	0	0	0	0	0	0	0	0	0	185	183	67	0	0	0	0	0	0	0	0	0	0	0	0	0
ERR527181	0	0	174	0	0	0	0	0	0	0	289	0	0	0	0	133	383	323	64	68	73	0	96	65	99	153	127	0	0	0	89	0	187	487	481	295	0	70	0	171	0	0	0	129	0	0	96	0	0
ERR527182	0	0	65	0	0	0	0	0	0	0	0	0	0	0	0	0	102	66	0	0	0	0	0	0	0	0	0	0	0	0	0	0	0	358	257	119	0	0	0	0	0	0	0	0	0	0	0	0	0
ERR527183	0	160	697	110	428	69	113	0	0	402	264	0	0	80	0	219	1161	759	207	223	358	85	503	146	118	325	867	568	0	275	194	167	438	1515	1953	888	134	124	129	420	141	0	310	278	415	216	434	316	0
ERR527184	0	0	0	0	0	0	0	0	0	0	0	0	0	0	0	0	0	0	0	0	0	0	0	0	0	0	0	0	0	0	0	0	0	0	201	90	0	0	0	0	0	0	0	0	0	0	0	0	0
ERR527185	0	0	0	0	0	0	0	0	0	0	0	0	0	0	0	0	0	0	0	0	0	0	0	0	0	0	0	0	0	0	0	0	0	0	144	61	0	0	0	0	0	0	0	0	0	0	0	0	0
ERR527186	0	0	74	0	0	0	0	0	0	0	0	0	0	0	0	0	129	108	0	0	0	0	94	0	0	0	115	82	0	0	0	0	0	192	1152	435	0	0	0	97	0	0	0	0	0	0	0	0	0
ERR527187	0	0	188	0	0	0	0	0	0	0	0	0	0	0	0	0	71	105	0	0	86	0	91	0	0	67	0	0	0	0	0	0	134	287	59	0	0	0	0	0	0	0	0	0	0	0	0	0	0
ERR527188	0	0	310	0	0	0	71	0	0	120	0	0	0	87	0	0	296	317	65	0	237	0	0	104	0	284	141	0	0	0	83	0	0	481	2640	256	0	0	95	0	0	0	0	0	0	0	0	0	0
ERR527189	0	129	309	0	0	0	105	0	0	0	0	0	0	0	0	0	276	308	0	0	130	0	76	175	0	171	139	144	0	0	0	0	95	348	677	333	0	0	0	133	0	0	111	135	0	0	0	0	0
ERR527190	0	0	87	0	0	0	0	0	0	0	0	0	0	0	0	0	66	86	0	0	0	0	0	0	0	0	0	0	0	0	0	0	117	276	159	66	0	0	0	0	0	0	0	0	0	0	0	0	0
ERR527191	0	0	0	0	0	0	0	0	0	0	0	0	0	0	0	0	0	0	0	0	0	0	0	0	0	0	0	0	0	0	0	0	0	324	0	0	0	0	0	0	0	0	0	0	0	0	0	0	0
ERR527192	0	0	0	0	0	0	0	0	0	0	0	0	0	0	0	0	0	0	0	0	0	0	0	0	0	0	0	0	0	0	0	0	0	0	0	0	0	0	0	0	0	0	0	0	0	0	0	0	0
ERR527193	0	0	64	0	0	0	0	0	0	164	0	0	0	0	0	0	96	136	0	0	0	0	0	0	0	0	481	136	0	336	0	136	173	1446	184	264	0	0	119	63	0	0	0	91	224	0	0	0	0
ERR527194	0	0	324	0	150	0	0	0	0	136	78	0	0	0	0	0	148	114	93	0	96	64	0	0	0	99	182	72	0	0	0	0	0	342	779	226	0	0	0	0	0	0	0	0	0	0	0	0	0
ERR527195	0	80	91	0	0	0	0	0	0	0	0	0	0	0	0	106	68	119	0	180	72	0	0	79	0	0	0	0	0	0	0	91	0	266	154	149	0	0	0	115	0	0	0	0	0	0	0	0	0
ERR527196	0	0	66	0	0	0	0	0	0	0	0	0	0	0	0	0	156	147	255	0	79	0	0	151	0	61	0	0	0	0	0	125	92	317	268	125	0	0	0	111	0	0	0	0	0	0	0	0	0
ERR527197	0	102	160	0	0	0	0	0	0	0	0	0	0	0	0	0	109	149	76	0	81	106	0	0	0	0	113	0	0	0	0	0	0	179	327	230	0	0	0	0	0	0	0	0	0	0	0	0	0
ERR527198	0	0	1336	0	0	0	0	0	0	0	219	0	0	0	0	150	274	373	350	92	234	81	703	76	183	157	0	0	0	0	0	0	86	77	956	1892	0	0	0	0	0	0	0	0	0	0	0	0	0
ERR527199	0	0	66	0	0	0	0	0	0	0	0	0	0	0	0	0	59	90	0	0	0	0	0	134	0	0	0	66	0	0	76	111	0	186	138	0	0	0	0	136	0	0	0	0	0	0	69	0	0
ERR527200	0	0	0	0	0	0	0	0	0	0	0	0	0	0	0	0	0	0	0	0	0	0	0	0	0	0	0	0	0	0	0	0	0	0	0	0	0	0	0	0	0	0	0	0	0	0	0	0	0
ERR527201	0	0	277	0	0	0	156	0	0	0	0	0	0	0	0	0	418	374	108	0	166	135	123	86	209	399	0	0	0	0	63	80	0	557	339	416	0	0	0	0	90	0	0	0	0	0	0	129	0
ERR527202	0	0	0	0	0	0	0	0	0	0	0	0	0	0	0	0	0	0	0	0	0	0	0	0	0	0	0	0	0	0	0	0	0	0	0	0	0	0	0	0	0	0	0	0	0	0	0	0	0
ERR527203	0	139	0	0	0	0	0	0	0	0	0	0	0	0	0	155	67	70	0	0	94	0	0	242	0	0	0	0	0	0	0	260	0	293	151	155	0	0	0	276	0	0	0	0	0	0	0	0	0
ERR527204	0	0	0	0	0	0	0	0	0	0	0	0	0	0	0	0	0	0	0	0	0	0	0	0	0	0	0	0	0	0	0	0	0	0	0	0	0	0	0	0	0	0	0	0	0	0	0	0	0
ERR527205	0	0	0	59	136	0	93	0	0	0	76	0	0	105	166	0	77	113	0	0	0	0	0	0	0	0	129	108	0	0	0	0	143	344	174	218	0	0	78	0	0	0	0	0	0	0	0	0	0
ERR527206	0	0	0	0	0	0	0	0	0	0	0	0	0	0	0	0	0	155	0	0	0	0	0	0	0	0	0	0	0	0	0	0	0	0	1517	436	0	0	0	0	0	0	0	0	0	0	0	0	0
ERR527207	0	0	171	0	0	0	0	0	0	0	0	0	0	0	0	0	138	379	0	0	88	0	0	220	0	73	83	288	0	0	0	143	151	388	2490	781	0	0	0	0	0	0	0	0	107	0	0	0	0
ERR527208	0	58	348	0	154	0	85	0	0	295	0	0	0	85	169	74	236	541	153	0	179	92	119	202	0	0	79	0	0	0	0	0	72	756	256	328	0	0	0	0	0	0	0	0	0	0	0	0	0
ERR527209	0	85	491	0	0	0	0	0	0	0	0	0	0	0	0	0	188	225	166	0	499	193	233	259	187	357	0	0	0	0	83	0	186	428	1070	241	0	0	0	0	0	0	0	0	0	0	0	0	0
ERR527210	0	0	195	0	0	0	0	0	0	183	0	0	0	0	0	130	102	249	116	0	0	0	0	0	73	0	0	0	0	0	0	0	0	566	390	275	0	0	0	0	0	0	0	0	0	0	0	0	0
ERR527211	0	0	129	0	0	0	0	0	0	0	0	0	0	0	0	0	90	146	0	0	0	0	0	77	0	0	0	0	0	0	0	0	74	169	225	62	0	0	0	0	0	0	0	0	0	0	0	0	0
ERR527212	0	0	0	0	0	0	0	0	0	0	0	0	0	0	0	0	0	0	0	0	0	0	0	0	0	0	0	0	0	0	0	0	0	0	0	0	0	0	0	0	0	0	0	0	0	0	0	0	0
ERR527213	0	71	285	0	0	0	0	0	0	0	0	0	0	0	0	102	248	301	65	0	206	0	87	74	85	145	211	0	0	0	0	0	101	585	440	188	0	0	0	89	0	0	0	0	0	0	0	0	0
ERR527214	0	0	0	0	0	0	0	0	0	0	0	0	0	0	0	0	0	0	0	0	0	0	0	0	0	0	0	0	0	0	0	0	0	0	0	0	0	0	0	0	0	0	0	0	0	0	0	0	0
ERR527215	0	0	80	0	108	0	0	0	0	0	0	0	0	0	0	0	68	73	0	0	116	0	0	0	0	0	115	0	0	0	0	0	0	127	188	172	0	0	98	0	0	0	0	0	0	0	0	0	0
ERR527216	0	160	0	0	0	0	0	0	0	0	0	0	0	0	0	0	0	0	0	0	0	158	0	0	0	0	0	0	0	0	0	0	0	0	0	1049	0	0	0	0	0	0	0	0	0	0	0	0	0
ERR527217	0	147	94	0	0	0	0	0	0	0	0	0	0	0	0	0	71	91	0	0	0	0	0	118	191	0	0	0	0	0	119	92	0	422	159	128	0	0	0	131	0	0	0	0	0	0	0	0	0
ERR527218	0	0	171	0	0	0	0	0	0	0	0	0	0	0	0	0	146	187	66	0	113	0	0	1102	70	83	0	0	0	0	0	342	95	925	1774	257	0	0	0	396	0	0	0	0	0	0	0	0	0
ERR528329	0	61	182	0	149	0	0	0	0	0	80	0	0	0	0	0	134	286	0	0	59	122	0	72	0	97	0	0	0	0	0	0	0	385	225	164	0	0	0	95	0	0	0	0	0	0	0	0	0
ERR528330	0	81	399	0	155	0	75	0	0	159	0	0	0	0	0	0	267	455	155	0	174	178	78	112	77	129	198	81	0	0	0	0	120	557	397	264	0	0	95	0	0	0	0	0	0	0	0	0	0
ERR528331	0	316	443	0	114	0	0	0	0	0	0	0	0	82	129	76	199	243	121	0	283	91	115	191	95	150	199	0	0	0	138	0	95	279	276	190	0	0	0	0	0	0	0	0	0	0	62	0	0
ERR528332	0	131	1127	115	281	117	99	0	0	458	193	0	0	120	139	271	744	707	543	107	1474	326	542	648	514	609	887	316	0	558	323	191	819	3400	2133	2956	153	261	192	302	150	0	0	288	503	317	183	183	0
ERR528333	0	0	109	0	0	0	0	0	0	257	0	0	0	0	0	95	0	197	0	0	126	0	0	0	0	67	0	0	0	0	0	0	0	445	172	76	0	0	0	0	0	0	0	0	0	0	0	0	0
ERR528334	0	0	230	174	0	0	0	0	0	0	0	0	0	0	0	0	250	222	100	0	173	90	66	72	0	93	0	80	0	0	74	0	178	702	402	194	0	0	76	76	0	0	0	0	0	0	0	0	0
ERR528335	0	0	298	0	0	0	0	0	0	0	0	0	0	0	0	0	86	248	99	0	201	0	0	107	0	271	0	0	0	0	0	0	0	282	94	0	0	0	0	0	0	0	0	0	0	0	0	0	0
ERR528336	0	0	266	0	0	0	0	0	0	144	0	0	0	62	0	0	161	304	64	0	133	89	58	0	0	102	197	81	0	0	0	0	133	951	386	326	0	0	0	0	0	0	0	98	0	0	62	0	0
ERR528337	0	180	641	239	110	0	0	0	0	366	129	0	0	65	0	93	219	291	165	0	551	159	218	449	189	255	518	92	0	204	363	384	300	1870	732	1270	128	119	82	596	0	0	192	111	501	180	135	0	0
ERR528721	0	0	0	0	0	0	0	0	0	0	0	0	0	0	0	0	0	0	0	0	0	0	0	0	0	0	0	0	0	0	0	0	0	0	0	0	0	0	0	0	0	0	0	0	0	0	0	0	0
ERR528722	0	79	390	63	0	0	75	0	0	274	0	0	0	0	144	0	508	439	155	66	175	150	85	110	88	158	268	71	0	106	77	0	539	841	931	555	0	0	118	122	0	0	0	88	130	96	91	0	0
ERR528723	0	0	129	0	0	0	0	0	482	0	0	0	0	0	0	114	107	168	109	0	59	0	0	341	0	131	166	0	0	0	0	285	193	268	1143	622	0	0	0	393	0	0	0	0	0	0	0	0	0
ERR528724	0	0	0	0	0	0	0	0	0	0	0	0	0	0	0	0	0	70	0	0	64	0	0	0	0	0	0	0	0	0	0	0	0	0	138	0	0	0	0	0	0	0	0	0	0	0	0	0	0
ERR528725	0	0	0	0	0	0	0	0	0	0	0	0	0	0	0	0	0	0	0	0	76	0	99	0	0	0	0	0	0	0	0	0	0	0	17902	1752	0	0	0	0	0	0	0	0	0	0	0	0	0
ERR528726	0	0	77	0	0	0	0	0	0	0	0	0	0	0	0	97	0	79	0	0	0	0	0	0	0	0	0	0	0	0	0	0	0	289	108	0	0	0	0	0	0	0	0	0	0	0	0	0	0
ERR528727	0	0	102	0	0	0	0	0	0	0	0	0	0	0	0	0	72	89	0	0	0	0	0	0	0	0	0	0	0	0	0	0	0	0	0	100	0	0	0	0	0	0	0	0	0	0	0	0	0
ERR528728	0	61	209	0	0	0	0	0	0	0	0	0	0	0	0	0	164	262	114	0	66	82	97	0	0	83	0	0	0	0	0	0	0	249	166	274	0	0	0	0	0	0	0	0	0	0	64	0	0
ERR528729	0	0	0	0	0	0	0	0	0	0	0	0	0	0	0	0	0	0	0	0	0	0	0	0	0	0	0	0	0	0	0	0	0	0	0	0	0	0	0	0	0	0	0	0	0	0	0	0	0
ERR528730	0	0	0	0	0	0	0	0	0	0	0	0	0	0	0	0	0	0	0	0	0	0	0	0	0	0	0	0	0	0	0	0	0	0	95	0	0	0	0	0	0	0	0	0	0	0	0	0	0
ERR528731	0	0	0	0	0	0	0	0	0	0	0	0	0	0	0	0	0	0	0	0	0	0	0	0	0	0	0	0	0	0	0	0	104	255	149	75	0	0	0	0	0	0	0	0	0	0	0	0	0
ERR528732	0	0	65	0	0	0	0	0	0	0	0	0	0	0	0	0	0	74	100	0	0	0	0	0	0	0	0	0	0	0	0	0	0	0	307	111	0	0	0	0	0	0	0	0	0	0	0	0	0
ERR528733	0	0	0	0	0	0	0	0	0	0	0	0	0	0	0	0	0	0	0	0	0	0	0	0	0	0	0	127	0	0	0	0	0	0	0	0	0	0	0	0	0	0	0	0	0	0	0	0	0
ERR528734	0	89	0	0	0	0	0	0	0	0	0	0	0	0	0	114	0	66	0	0	85	0	0	0	0	0	0	221	0	0	0	129	98	364	102	0	0	0	0	180	0	0	0	0	0	0	0	0	0
ERR528735	0	175	534	0	0	0	99	0	0	384	0	0	0	0	0	0	299	439	88	0	201	135	77	104	0	156	133	140	0	0	0	0	138	617	722	255	0	0	60	66	0	0	0	82	152	0	80	0	0
ERR528736	0	0	77	0	302	0	84	0	0	208	0	0	0	0	0	0	0	90	0	0	99	0	0	0	0	0	183	0	0	0	0	0	0	287	166	142	0	0	68	0	0	0	0	0	0	0	0	0	0
ERR528737	0	157	190	0	0	0	0	0	0	0	0	0	0	0	0	102	140	98	0	0	0	94	0	241	58	71	0	191	0	0	135	224	0	1164	206	237	0	0	0	121	0	0	0	0	0	0	98	0	0
ERR528738	0	0	0	0	0	0	0	0	0	0	0	0	0	0	0	0	0	0	0	0	0	0	0	0	0	0	0	0	0	0	0	0	0	0	0	0	0	0	0	0	0	0	0	0	0	0	0	0	0
ERR528739	0	68	0	76	0	0	0	0	0	212	0	0	0	0	0	74	71	98	0	0	0	0	0	0	0	0	304	92	0	207	0	0	108	382	303	200	0	0	67	0	66	0	0	0	0	0	0	0	0
ERR528740	0	0	0	0	0	0	0	0	0	0	0	0	0	0	0	0	0	0	0	0	0	0	0	0	0	0	0	0	0	0	0	0	0	0	0	0	0	0	0	0	0	0	0	0	0	0	0	0	0
ERR528741	0	0	240	0	230	0	92	0	0	0	0	0	0	77	256	0	236	272	107	0	103	90	102	198	0	0	0	0	0	0	0	0	111	135	165	99	0	0	0	0	0	0	0	0	0	0	0	0	61
ERR528742	0	203	74	0	0	0	0	0	0	0	0	0	0	0	0	0	67	58	0	0	188	0	0	0	95	126	0	0	0	0	0	75	0	164	149	58	0	0	0	67	0	0	0	0	0	0	0	0	0
ERR528743	0	74	536	0	119	0	0	0	0	0	0	0	0	63	174	115	313	581	203	0	519	81	189	210	116	268	0	0	0	0	95	0	142	429	407	294	0	0	0	60	0	0	0	0	0	0	60	0	0
ERR528744	0	0	1163	0	0	0	238	0	0	325	0	0	0	101	0	215	584	552	122	0	292	379	104	0	138	261	157	109	0	0	0	0	117	652	521	380	166	0	0	71	0	0	0	0	0	0	93	143	0
ERR528745	0	127	693	0	224	0	0	0	0	275	0	0	0	0	130	98	481	826	261	0	692	171	137	287	154	371	304	76	0	231	190	0	206	536	1087	681	0	0	61	196	0	0	0	0	178	0	170	92	0
ERR528746	0	810	261	198	0	176	0	0	0	374	0	0	147	0	0	222	465	263	155	0	106	135	196	70	662	868	259	84	0	121	0	431	369	1719	651	537	0	0	183	108	144	0	217	0	0	0	136	467	0
ERR528747	0	0	681	0	156	98	61	0	0	0	0	0	0	0	0	0	299	570	308	0	248	0	128	89	126	105	0	0	0	0	0	0	0	350	859	571	0	0	0	0	0	0	0	0	0	0	190	0	0
ERR528748	0	0	174	130	0	0	0	0	0	0	0	0	0	0	0	81	348	181	108	0	140	0	124	0	147	196	0	0	0	0	0	0	147	193	223	194	0	0	0	83	0	0	0	0	0	0	145	0	0
ERR528749	0	0	182	0	0	0	0	0	0	0	0	0	0	0	0	165	247	277	107	0	57	0	121	0	77	0	0	0	0	0	0	0	86	356	2055	1553	0	0	0	0	0	0	0	0	0	0	0	0	0
ERR532377	0	0	230	174	0	0	0	0	0	0	0	0	0	0	0	0	250	222	100	0	173	90	66	72	0	93	0	80	0	0	74	0	178	702	402	194	0	0	76	76	0	0	0	0	0	0	0	0	0
ERR532378	0	0	0	0	0	0	0	0	0	0	0	0	0	0	0	0	0	0	0	0	0	0	0	0	0	0	0	0	0	0	0	0	0	228	28587	16107	0	0	0	0	0	0	0	0	0	0	0	0	0
ERR532379	0	101	0	0	0	0	0	0	0	0	0	0	0	0	0	0	0	65	0	0	100	0	0	71	0	0	0	0	0	0	0	82	0	122	297	86	0	0	0	130	0	0	0	0	0	0	0	0	0
ERR532380	0	0	105	0	0	0	0	0	0	0	0	0	0	0	0	75	73	114	0	0	0	0	0	0	0	0	0	0	0	0	0	0	213	418	317	269	265	0	0	0	0	0	0	0	0	0	0	0	0
ERR532381	0	63	682	0	0	0	0	0	0	0	0	0	0	0	0	162	508	462	132	0	259	180	149	95	131	244	120	133	0	92	0	0	79	444	1100	300	0	0	0	72	0	0	0	0	0	0	71	0	0
ERR532382	0	171	84	88	0	0	0	0	0	0	0	0	147	0	0	132	136	110	0	0	67	0	68	0	0	89	200	70	0	0	123	0	259	741	301	146	0	0	0	84	102	0	0	0	0	0	0	0	0
ERR532383	0	0	288	0	109	0	65	0	0	193	116	0	0	84	0	81	563	436	332	211	238	125	0	208	168	187	794	355	0	217	114	276	516	1342	19161	2934	0	85	154	148	59	0	0	0	281	97	97	0	0
ERR532384	0	0	253	0	133	0	0	0	278	0	0	0	0	0	0	0	143	295	165	0	601	96	0	770	0	145	189	183	0	101	133	590	162	1457	863	258	0	70	0	919	0	0	0	0	78	80	514	0	0
ERR532385	0	0	79	0	0	0	0	0	0	0	0	0	0	0	0	72	133	126	0	0	115	66	78	72	0	0	0	0	0	0	0	69	114	337	288	143	0	0	0	159	0	0	0	0	0	0	0	0	0
ERR532386	0	0	0	0	0	0	0	0	0	0	0	0	0	0	0	0	0	0	0	0	0	0	0	0	0	0	0	0	0	0	0	0	0	0	0	0	0	0	0	0	0	0	0	0	0	0	0	0	0
ERR532387	0	0	0	0	0	0	0	0	0	106	0	0	0	0	0	0	0	74	0	87	0	0	0	0	0	0	0	0	0	0	0	0	208	349	93	0	0	0	0	0	0	0	0	0	0	0	0	0	0
ERR532388	0	60	448	173	0	0	173	0	0	0	0	0	0	0	0	63	324	404	121	0	140	73	233	0	68	108	0	139	0	71	0	0	0	234	776	251	0	0	0	0	0	0	121	0	116	0	70	0	0
ERR532389	0	0	0	0	0	0	0	0	0	132	78	0	0	0	0	0	57	121	0	0	0	0	80	0	0	0	240	0	0	0	0	0	0	173	116	1625	0	0	59	0	0	0	0	80	0	0	0	0	0
ERR532390	0	0	114	0	0	0	0	0	0	0	0	0	0	0	0	0	161	126	80	0	85	0	0	77	0	0	0	0	0	0	0	0	0	103	178	272	0	0	0	0	0	0	0	0	0	0	0	0	0
ERR532391	0	0	166	0	0	0	0	0	0	0	0	0	0	0	0	0	0	68	0	0	95	0	0	0	90	123	0	0	0	0	0	0	0	0	84	113	0	0	0	0	0	0	0	0	0	0	0	0	0
ERR532392	0	0	74	0	0	0	0	0	0	0	0	0	0	0	0	0	0	0	0	0	0	0	0	0	0	0	0	0	0	0	0	0	0	0	0	0	0	0	0	0	0	0	0	0	0	0	0	0	0
ERR532393	0	0	383	0	0	136	108	0	0	0	92	0	0	0	0	171	327	205	62	0	154	236	75	0	0	85	278	82	0	0	91	0	231	604	8120	1106	0	0	0	63	0	0	0	89	209	0	87	105	0
ERR532394	0	0	261	0	0	0	0	0	0	0	0	0	0	0	0	107	142	234	57	151	121	74	0	0	0	0	0	0	0	0	0	0	0	288	1463	553	0	0	0	0	0	0	0	0	0	0	0	0	0
ERR532618	0	0	0	0	0	0	0	0	0	0	0	0	0	0	0	0	0	0	0	0	0	0	0	0	0	0	0	0	0	0	0	0	0	0	0	0	0	0	0	0	0	0	0	0	0	0	0	0	0
ERR532619	0	0	0	0	0	0	0	0	0	196	0	0	0	0	0	0	81	135	0	0	0	0	0	0	0	0	0	0	0	0	0	0	0	1030	162	63	0	0	0	0	0	0	0	0	0	0	0	0	0
ERR532620	0	0	0	0	0	0	0	0	0	0	0	0	0	0	0	83	0	86	0	0	0	0	0	0	0	0	0	0	0	0	0	0	0	308	65	95	0	0	0	0	0	0	0	0	0	0	0	0	0
ERR532621	0	462	898	132	141	69	76	0	0	263	80	0	0	80	0	253	507	893	266	99	464	232	293	220	132	389	294	146	0	142	263	119	212	1465	1292	698	0	63	68	129	0	0	0	0	107	73	75	157	0
ERR532622	0	0	127	0	0	0	0	0	0	0	0	0	0	0	0	0	0	117	62	0	152	0	0	69	0	116	0	0	0	0	0	0	0	0	75	0	0	0	0	0	0	0	0	0	0	0	0	0	0
ERR532623	0	0	243	0	107	0	0	0	0	0	0	0	0	0	0	0	0	242	136	0	283	0	0	129	58	210	0	0	0	0	126	0	96	326	163	150	0	0	0	0	0	0	0	0	0	0	0	0	0
[truncated: 5,000 more columns]

## Sheet: example_other_metadata
	Group_filtered	Group	Cohort
DC_02	CTR	CTR	PRJEB17784
PD_17	Case	parkinson	PRJEB17784
PD_22	Case	parkinson	PRJEB17784
DC_12	CTR	CTR	PRJEB17784
PD_21	Case	parkinson	PRJEB17784
CO_03	CTR	CTR	PRJEB17784
PD_20	Case	parkinson	PRJEB17784
PD_01	Case	parkinson	PRJEB17784
DC_14	CTR	CTR	PRJEB17784
PD_11	Case	parkinson	PRJEB17784
PD_36	Case	parkinson	PRJEB17784
DC_06	CTR	CTR	PRJEB17784
PD_38	Case	parkinson	PRJEB17784
PD_28	Case	parkinson	PRJEB17784
DC_15	CTR	CTR	PRJEB17784
CO_11	CTR	CTR	PRJEB17784
CO_07	CTR	CTR	PRJEB17784
PD_30	Case	parkinson	PRJEB17784
PD_42	Case	parkinson	PRJEB17784
PD_16	Case	parkinson	PRJEB17784
DC_04	CTR	CTR	PRJEB17784
CO_12	CTR	CTR	PRJEB17784
DC_01	CTR	CTR	PRJEB17784
PD_03	Case	parkinson	PRJEB17784
DC_10	CTR	CTR	PRJEB17784
PD_15	Case	parkinson	PRJEB17784
PD_07	Case	parkinson	PRJEB17784
DC_07	CTR	CTR	PRJEB17784
DC_03	CTR	CTR	PRJEB17784
PD_05	Case	parkinson	PRJEB17784
DC_11	CTR	CTR	PRJEB17784
PD_23	Case	parkinson	PRJEB17784
CO_04	CTR	CTR	PRJEB17784
CO_02	CTR	CTR	PRJEB17784
PD_37	Case	parkinson	PRJEB17784
PD_08	Case	parkinson	PRJEB17784
DC_09	CTR	CTR	PRJEB17784
PD_25	Case	parkinson	PRJEB17784
CO_01	CTR	CTR	PRJEB17784
CO_13	CTR	CTR	PRJEB17784
PD_02	Case	parkinson	PRJEB17784
PD_13	Case	parkinson	PRJEB17784
PD_31	Case	parkinson	PRJEB17784
CO_05	CTR	CTR	PRJEB17784
PD_14	Case	parkinson	PRJEB17784
DC_08	CTR	CTR	PRJEB17784
PD_06	Case	parkinson	PRJEB17784
PD_18	Case	parkinson	PRJEB17784
PD_19	Case	parkinson	PRJEB17784
CO_08	CTR	CTR	PRJEB17784
PD_04	Case	parkinson	PRJEB17784
CO_09	CTR	CTR	PRJEB17784
DC_05	CTR	CTR	PRJEB17784
DC_13	CTR	CTR	PRJEB17784
CO_06	CTR	CTR	PRJEB17784
PD_26	Case	parkinson	PRJEB17784
PD_12	Case	parkinson	PRJEB17784
CO_10	CTR	CTR	PRJEB17784
PD_41	Case	parkinson	PRJEB17784
ERR260193	CTR	CTR	PRJEB1786
ERR260204	CTR	CTR	PRJEB1786
ERR260209	CTR	CTR	PRJEB1786
ERR260224	CTR	CTR	PRJEB1786
ERR260225	CTR	CTR	PRJEB1786
ERR260226	CTR	CTR	PRJEB1786
ERR260227	CTR	CTR	PRJEB1786
ERR260250	CTR	CTR	PRJEB1786
ERR260251	CTR	CTR	PRJEB1786
ERR260252	CTR	CTR	PRJEB1786
ERR260253	CTR	CTR	PRJEB1786
ERR260268	CTR	CTR	PRJEB1786
ERR260255	CTR	CTR	PRJEB1786
ERR260256	CTR	CTR	PRJEB1786
ERR260258	CTR	CTR	PRJEB1786
ERR260259	CTR	CTR	PRJEB1786
ERR260260	CTR	CTR	PRJEB1786
ERR260261	Case	T2D	PRJEB1786
ERR260263	CTR	CTR	PRJEB1786
ERR260264	CTR	CTR	PRJEB1786
ERR260265	CTR	CTR	PRJEB1786
ERR260266	CTR	CTR	PRJEB1786
ERR260267	CTR	CTR	PRJEB1786
ERR260229	Case	T2D	PRJEB1786
ERR260230	CTR	CTR	PRJEB1786
ERR260231	CTR	CTR	PRJEB1786
ERR260234	CTR	CTR	PRJEB1786
ERR260235	Case	T2D	PRJEB1786
ERR260238	Case	T2D	PRJEB1786
ERR260239	Case	T2D	PRJEB1786
ERR260240	Case	T2D	PRJEB1786
ERR260241	Case	T2D	PRJEB1786
ERR260242	CTR	CTR	PRJEB1786
ERR260243	CTR	CTR	PRJEB1786
ERR260244	CTR	CTR	PRJEB1786
ERR260270	Case	T2D	PRJEB1786
ERR260246	CTR	CTR	PRJEB1786
ERR260271	Case	T2D	PRJEB1786
ERR260139	Case	T2D	PRJEB1786
ERR260140	Case	T2D	PRJEB1786
ERR260144	Case	T2D	PRJEB1786
ERR260147	CTR	CTR	PRJEB1786
ERR260149	Case	T2D	PRJEB1786
ERR260151	Case	T2D	PRJEB1786
ERR260152	Case	T2D	PRJEB1786
ERR260153	CTR	CTR	PRJEB1786
ERR260155	Case	T2D	PRJEB1786
ERR260159	Case	T2D	PRJEB1786
ERR260161	Case	T2D	PRJEB1786
ERR260162	Case	T2D	PRJEB1786
ERR260163	CTR	CTR	PRJEB1786
ERR260165	Case	T2D	PRJEB1786
ERR260166	Case	T2D	PRJEB1786
ERR260167	Case	T2D	PRJEB1786
ERR260169	Case	T2D	PRJEB1786
ERR260170	CTR	CTR	PRJEB1786
ERR260171	CTR	CTR	PRJEB1786
ERR260173	Case	T2D	PRJEB1786
ERR260174	Case	T2D	PRJEB1786
ERR260175	CTR	CTR	PRJEB1786
ERR260176	Case	T2D	PRJEB1786
ERR260273	Case	T2D	PRJEB1786
ERR260274	Case	T2D	PRJEB1786
ERR260178	Case	T2D	PRJEB1786
ERR260179	Case	T2D	PRJEB1786
ERR260180	CTR	CTR	PRJEB1786
ERR260181	Case	T2D	PRJEB1786
ERR260182	Case	T2D	PRJEB1786
ERR260185	Case	T2D	PRJEB1786
ERR260186	Case	T2D	PRJEB1786
ERR260188	Case	T2D	PRJEB1786
ERR260189	Case	T2D	PRJEB1786
ERR260190	Case	T2D	PRJEB1786
ERR260191	Case	T2D	PRJEB1786
ERR260192	Case	T2D	PRJEB1786
ERR260194	Case	T2D	PRJEB1786
ERR260196	Case	T2D	PRJEB1786
ERR260276	Case	T2D	PRJEB1786
ERR260198	Case	T2D	PRJEB1786
ERR260199	Case	T2D	PRJEB1786
ERR260201	Case	T2D	PRJEB1786
ERR260202	Case	T2D	PRJEB1786
ERR260203	Case	T2D	PRJEB1786
ERR260205	CTR	CTR	PRJEB1786
ERR260206	Case	T2D	PRJEB1786
ERR260207	Case	T2D	PRJEB1786
ERR260208	Case	T2D	PRJEB1786
ERR260210	Case	T2D	PRJEB1786
ERR275252	Case	T2D	PRJEB1786
ERR260214	Case	T2D	PRJEB1786
ERR260215	CTR	CTR	PRJEB1786
ERR260216	CTR	CTR	PRJEB1786
ERR260217	CTR	CTR	PRJEB1786
ERR260218	CTR	CTR	PRJEB1786
ERR260221	CTR	CTR	PRJEB1786
ERR260223	CTR	CTR	PRJEB1786
ERR526291	CTR	CTR	PRJEB6337
ERR527046	CTR	CTR	PRJEB6337
ERR527047	CTR	CTR	PRJEB6337
ERR527048	CTR	CTR	PRJEB6337
ERR527049	CTR	CTR	PRJEB6337
ERR527050	CTR	CTR	PRJEB6337
ERR527051	CTR	CTR	PRJEB6337
ERR527052	CTR	CTR	PRJEB6337
ERR527053	CTR	CTR	PRJEB6337
ERR527054	CTR	CTR	PRJEB6337
ERR527055	CTR	CTR	PRJEB6337
ERR527056	CTR	CTR	PRJEB6337
ERR527057	CTR	CTR	PRJEB6337
ERR527058	CTR	CTR	PRJEB6337
ERR527059	CTR	CTR	PRJEB6337
ERR527060	CTR	CTR	PRJEB6337
ERR527061	CTR	CTR	PRJEB6337
ERR527062	CTR	CTR	PRJEB6337
ERR527063	CTR	CTR	PRJEB6337
ERR527064	CTR	CTR	PRJEB6337
ERR527065	CTR	CTR	PRJEB6337
ERR527066	CTR	CTR	PRJEB6337
ERR527067	CTR	CTR	PRJEB6337
ERR527068	CTR	CTR	PRJEB6337
ERR527069	CTR	CTR	PRJEB6337
ERR527070	CTR	CTR	PRJEB6337
ERR527071	CTR	CTR	PRJEB6337
ERR527072	CTR	CTR	PRJEB6337
ERR527073	CTR	CTR	PRJEB6337
ERR527074	CTR	CTR	PRJEB6337
ERR527075	CTR	CTR	PRJEB6337
ERR527076	CTR	CTR	PRJEB6337
ERR527077	CTR	CTR	PRJEB6337
ERR527078	CTR	CTR	PRJEB6337
ERR527079	CTR	CTR	PRJEB6337
ERR527080	CTR	CTR	PRJEB6337
ERR527081	CTR	CTR	PRJEB6337
ERR527082	CTR	CTR	PRJEB6337
ERR527083	CTR	CTR	PRJEB6337
ERR527084	CTR	CTR	PRJEB6337
ERR527085	CTR	CTR	PRJEB6337
ERR527086	CTR	CTR	PRJEB6337
ERR527087	CTR	CTR	PRJEB6337
ERR527088	CTR	CTR	PRJEB6337
ERR527089	CTR	CTR	PRJEB6337
ERR527090	CTR	CTR	PRJEB6337
ERR527091	CTR	CTR	PRJEB6337
ERR527092	CTR	CTR	PRJEB6337
ERR527093	CTR	CTR	PRJEB6337
ERR527094	CTR	CTR	PRJEB6337
ERR527095	CTR	CTR	PRJEB6337
ERR527096	CTR	CTR	PRJEB6337
ERR527097	CTR	CTR	PRJEB6337
ERR527098	CTR	CTR	PRJEB6337
ERR527099	CTR	CTR	PRJEB6337
ERR527100	CTR	CTR	PRJEB6337
ERR527101	CTR	CTR	PRJEB6337
ERR527102	CTR	CTR	PRJEB6337
ERR527103	CTR	CTR	PRJEB6337
ERR527104	CTR	CTR	PRJEB6337
ERR527105	CTR	CTR	PRJEB6337
ERR527106	CTR	CTR	PRJEB6337
ERR527107	CTR	CTR	PRJEB6337
ERR527108	CTR	CTR	PRJEB6337
ERR527109	CTR	CTR	PRJEB6337
ERR527110	CTR	CTR	PRJEB6337
ERR527111	CTR	CTR	PRJEB6337
ERR527112	CTR	CTR	PRJEB6337
ERR527113	CTR	CTR	PRJEB6337
ERR527114	CTR	CTR	PRJEB6337
ERR527115	CTR	CTR	PRJEB6337
ERR527116	CTR	CTR	PRJEB6337
ERR527117	CTR	CTR	PRJEB6337
ERR527118	CTR	CTR	PRJEB6337
ERR527119	CTR	CTR	PRJEB6337
ERR527120	CTR	CTR	PRJEB6337
ERR527121	CTR	CTR	PRJEB6337
ERR527122	CTR	CTR	PRJEB6337
ERR527123	CTR	CTR	PRJEB6337
ERR527124	CTR	CTR	PRJEB6337
ERR527125	CTR	CTR	PRJEB6337
ERR527126	CTR	CTR	PRJEB6337
ERR527127	CTR	CTR	PRJEB6337
ERR527128	CTR	CTR	PRJEB6337
ERR527129	CTR	CTR	PRJEB6337
ERR527130	CTR	CTR	PRJEB6337
ERR527131	CTR	CTR	PRJEB6337
ERR527132	CTR	CTR	PRJEB6337
ERR527133	CTR	CTR	PRJEB6337
ERR527134	CTR	CTR	PRJEB6337
ERR527135	CTR	CTR	PRJEB6337
ERR527136	CTR	CTR	PRJEB6337
ERR527137	CTR	CTR	PRJEB6337
ERR527138	CTR	CTR	PRJEB6337
ERR527139	CTR	CTR	PRJEB6337
ERR527140	Case	LC	PRJEB6337
ERR527141	Case	LC	PRJEB6337
ERR527142	Case	LC	PRJEB6337
ERR527143	Case	LC	PRJEB6337
ERR527144	Case	LC	PRJEB6337
ERR527145	Case	LC	PRJEB6337
ERR527146	Case	LC	PRJEB6337
ERR527147	Case	LC	PRJEB6337
ERR527148	Case	LC	PRJEB6337
ERR527149	Case	LC	PRJEB6337
ERR527150	Case	LC	PRJEB6337
ERR527151	Case	LC	PRJEB6337
ERR527152	Case	LC	PRJEB6337
ERR527153	Case	LC	PRJEB6337
ERR527154	Case	LC	PRJEB6337
ERR527155	Case	LC	PRJEB6337
ERR527156	Case	LC	PRJEB6337
ERR527157	Case	LC	PRJEB6337
ERR527158	Case	LC	PRJEB6337
ERR527159	Case	LC	PRJEB6337
ERR527160	Case	LC	PRJEB6337
ERR527161	Case	LC	PRJEB6337
ERR527162	Case	LC	PRJEB6337
ERR527164	Case	LC	PRJEB6337
ERR527165	Case	LC	PRJEB6337
ERR527166	Case	LC	PRJEB6337
ERR527167	Case	LC	PRJEB6337
ERR527168	Case	LC	PRJEB6337
ERR527169	Case	LC	PRJEB6337
ERR527170	Case	LC	PRJEB6337
ERR527171	Case	LC	PRJEB6337
ERR527172	Case	LC	PRJEB6337
ERR527173	Case	LC	PRJEB6337
ERR527174	Case	LC	PRJEB6337
ERR527175	Case	LC	PRJEB6337
ERR527176	Case	LC	PRJEB6337
ERR527177	Case	LC	PRJEB6337
ERR527178	Case	LC	PRJEB6337
ERR527179	Case	LC	PRJEB6337
ERR527180	Case	LC	PRJEB6337
ERR527181	Case	LC	PRJEB6337
ERR527182	Case	LC	PRJEB6337
ERR527183	Case	LC	PRJEB6337
ERR527184	Case	LC	PRJEB6337
ERR527185	Case	LC	PRJEB6337
ERR527186	Case	LC	PRJEB6337
ERR527187	Case	LC	PRJEB6337
ERR527188	Case	LC	PRJEB6337
ERR527189	Case	LC	PRJEB6337
ERR527190	Case	LC	PRJEB6337
ERR527191	Case	LC	PRJEB6337
ERR527192	Case	LC	PRJEB6337
ERR527193	Case	LC	PRJEB6337
ERR527194	Case	LC	PRJEB6337
ERR527195	Case	LC	PRJEB6337
ERR527196	Case	LC	PRJEB6337
ERR527197	Case	LC	PRJEB6337
ERR527198	Case	LC	PRJEB6337
ERR527199	Case	LC	PRJEB6337
ERR527200	Case	LC	PRJEB6337
ERR527201	Case	LC	PRJEB6337
ERR527202	Case	LC	PRJEB6337
ERR527203	Case	LC	PRJEB6337
ERR527204	Case	LC	PRJEB6337
ERR527205	Case	LC	PRJEB6337
ERR527206	Case	LC	PRJEB6337
ERR527207	Case	LC	PRJEB6337
ERR527208	Case	LC	PRJEB6337
ERR527209	Case	LC	PRJEB6337
ERR527210	Case	LC	PRJEB6337
ERR527211	Case	LC	PRJEB6337
ERR527212	Case	LC	PRJEB6337
ERR527213	Case	LC	PRJEB6337
ERR527214	Case	LC	PRJEB6337
ERR527215	Case	LC	PRJEB6337
ERR527216	Case	LC	PRJEB6337
ERR527217	Case	LC	PRJEB6337
ERR527218	Case	LC	PRJEB6337
ERR528329	CTR	CTR	PRJEB6337
ERR528330	CTR	CTR	PRJEB6337
ERR528331	CTR	CTR	PRJEB6337
ERR528332	CTR	CTR	PRJEB6337
ERR528333	CTR	CTR	PRJEB6337
ERR528334	CTR	CTR	PRJEB6337
ERR528335	CTR	CTR	PRJEB6337
ERR528336	CTR	CTR	PRJEB6337
ERR528337	CTR	CTR	PRJEB6337
ERR528721	Case	LC	PRJEB6337
ERR528722	Case	LC	PRJEB6337
ERR528723	Case	LC	PRJEB6337
ERR528724	Case	LC	PRJEB6337
ERR528725	Case	LC	PRJEB6337
ERR528726	Case	LC	PRJEB6337
ERR528727	Case	LC	PRJEB6337
ERR528728	Case	LC	PRJEB6337
ERR528729	Case	LC	PRJEB6337
ERR528730	Case	LC	PRJEB6337
ERR528731	Case	LC	PRJEB6337
ERR528732	Case	LC	PRJEB6337
ERR528733	Case	LC	PRJEB6337
ERR528734	Case	LC	PRJEB6337
ERR528735	Case	LC	PRJEB6337
ERR528736	Case	LC	PRJEB6337
ERR528737	Case	LC	PRJEB6337
ERR528738	Case	LC	PRJEB6337
ERR528739	Case	LC	PRJEB6337
ERR528740	Case	LC	PRJEB6337
ERR528741	Case	LC	PRJEB6337
ERR528742	Case	LC	PRJEB6337
ERR528743	Case	LC	PRJEB6337
ERR528744	Case	LC	PRJEB6337
ERR528745	Case	LC	PRJEB6337
ERR528746	Case	LC	PRJEB6337
ERR528747	Case	LC	PRJEB6337
ERR528748	Case	LC	PRJEB6337
ERR528749	Case	LC	PRJEB6337
ERR532377	CTR	CTR	PRJEB6337
ERR532378	Case	LC	PRJEB6337
ERR532379	Case	LC	PRJEB6337
ERR532380	Case	LC	PRJEB6337
ERR532381	Case	LC	PRJEB6337
ERR532382	Case	LC	PRJEB6337
ERR532383	Case	LC	PRJEB6337
ERR532384	Case	LC	PRJEB6337
ERR532385	Case	LC	PRJEB6337
ERR532386	Case	LC	PRJEB6337
ERR532387	Case	LC	PRJEB6337
ERR532388	Case	LC	PRJEB6337
ERR532389	Case	LC	PRJEB6337
ERR532390	Case	LC	PRJEB6337
ERR532391	Case	LC	PRJEB6337
ERR532392	Case	LC	PRJEB6337
ERR532393	Case	LC	PRJEB6337
ERR532394	Case	LC	PRJEB6337
ERR532618	Case	LC	PRJEB6337
ERR532619	Case	LC	PRJEB6337
ERR532620	Case	LC	PRJEB6337
ERR532621	Case	LC	PRJEB6337
ERR532622	Case	LC	PRJEB6337
ERR532623	Case	LC	PRJEB6337
